# Supplementary material for: Assembly of a pangenome for global cattle reveals missing sequences and novel structural variations, providing new insights into their diversity and evolutionary history
Source: HighWire-hosted journal article supplement (doi:10.1101/gr.276550.122), 2022-08-01
Supplement: Supplemental_Tables.xlsx [file Supplemental_Tables.xlsx]

## Sheet: Table S1
	Table S1 Whole genome sequencing dataset used in this study
	ID	Breed	Bioproject	Read count	Coverage	Mapping rate
	SRR12452205	Afar	PRJNA574857	250237053	13.8209	99.27%
	SRR12452203	Afar	PRJNA574857	250911526	13.8582	99.08%
	SRR12452208	Afar	PRJNA574857	255459757	14.1094	99.27%
	SRR12452204	Afar	PRJNA574857	281043916	15.5224	99.28%
	SRR12452210	Afar	PRJNA574857	290384002	16.0383	99.35%
	SRR12452202	Afar	PRJNA574857	296549221	16.3788	99.06%
	SRR12452209	Afar	PRJNA574857	301672258	16.6617	99.29%
	SRR12452207	Afar	PRJNA574857	303386382	16.7564	99.34%
	SRR12452211	Afar	PRJNA574857	320660767	17.7105	99.34%
	SRR1525686	Angus	PRJNA256210	163511306	9.03093	98.56%
	SRR1525687	Angus	PRJNA256210	164369360	9.07833	99.09%
	SRR1525693	Angus	PRJNA256210	166376769	9.1892	98.78%
	SRR1525689	Angus	PRJNA256210	166410253	9.19105	98.73%
	SRR1525690	Angus	PRJNA256210	167488499	9.2506	98.96%
	SRR1525692	Angus	PRJNA256210	176281008	9.73622	98.74%
	SRR1525582	Angus	PRJNA256210	181189454	10.0073	98.75%
	SRR1525688	Angus	PRJNA256210	182403184	10.0744	96.78%
	SRR1525583	Angus	PRJNA256210	187482991	10.3549	98.74%
	SRR1525691	Angus	PRJNA256210	190354606	10.5135	98.97%
	SRR7340787	Angus	PRJNA431934	192136946	10.612	99.03%
	SRR7340784	Angus	PRJNA431934	192214446	10.6162	99.14%
	SRR7340781	Angus	PRJNA431934	203604995	11.2454	99.14%
	SRR7340788	Angus	PRJNA431934	209073076	11.5474	99.06%
	SRR7340661	Angus	PRJNA431934	209141783	11.5512	98.76%
	SRR7340782	Angus	PRJNA431934	222377686	12.2822	98.95%
	SRR7340786	Angus	PRJNA431934	222983443	12.3157	99.06%
	SAMN05216013	Angus	PRJNA324822	229628659	12.6827	99.27%
	SRR7340660	Angus	PRJNA431934	232464282	12.8393	98.43%
	SAMN05216010	Angus	PRJNA324822	236223596	13.0469	99.25%
	SRR7340783	Angus	PRJNA431934	238574494	13.1768	98.96%
	SRR1425150	Angus	PRJNA176557	249743220	13.7936	97.42%
	SAMN05216014	Angus	PRJNA324822	254170912	14.0382	99.27%
	SAMN05216011	Angus	PRJNA324822	254755076	14.0704	99.25%
	SAMN05216012	Angus	PRJNA324822	260558869	14.391	99.26%
	SRR1348573	Angus	PRJNA176557	262698215	14.5092	98.99%
	SRR8588238	Angus	PRJNA343262	269400596	14.8793	98.78%
	SRR8588258	Angus	PRJNA343262	284235730	15.6987	98.63%
	SRR7340785	Angus	PRJNA431934	285696048	15.7793	98.71%
	SRR1346391	Angus	PRJNA176557	289161819	15.9708	98.40%
	SRR1343174	Angus	PRJNA176557	290735816	16.0577	99.08%
	SRR1348581	Angus	PRJNA176557	291762977	16.1144	98.28%
	SRR1355257	Angus	PRJNA176557	292775740	16.1704	98.24%
	SAMN05788530	Angus	PRJNA343262	294838882	16.2843	98.89%
	SRR1425149	Angus	PRJNA176557	295156097	16.3018	97.98%
	SRR1425147	Angus	PRJNA176557	299055418	16.5172	98.06%
	SRR8588260	Angus	PRJNA343262	299840683	16.5606	99.02%
	SAMN05216009	Angus	PRJNA324822	299917649	16.5648	99.21%
	SRR1346379	Angus	PRJNA176557	300130473	16.5766	98.49%
	SRR1425148	Angus	PRJNA176557	306066296	16.9044	97.74%
	SRR1355255	Angus	PRJNA176557	307498015	16.9835	98.38%
	SRR1262658	Angus	PRJNA238491	309098367	17.0719	99.19%
	SRR8588259	Angus	PRJNA343262	311534573	17.2064	99.04%
	SRR1348580	Angus	PRJNA176557	312301997	17.2488	98.35%
	SRR1355244	Angus	PRJNA176557	316939144	17.5049	98.85%
	SRR3507168	Angus	PRJNA318087	317450844	17.5332	99.11%
	SRR3507166	Angus	PRJNA318087	317466218	17.5341	99.25%
	SRR1365132	Angus	PRJNA176557	317862314	17.5559	98.32%
	SRR7340780	Angus	PRJNA431934	318104895	17.5693	99.18%
	SRR3507165	Angus	PRJNA318087	320866342	17.7218	98.91%
	SRR1346376	Angus	PRJNA176557	335770446	18.545	98.55%
	SAMN05788480	Angus	PRJNA343262	339300640	18.74	97.68%
	SAMN05948863	Angus	PRJNA343262	352233986	19.4543	99.13%
	SRR3496901	Angus	PRJNA318087	352304027	19.4582	98.08%
	SRR8588136	Angus	PRJNA343262	352440498	19.4657	98.82%
	SRR8587926	Angus	PRJNA343262	355835219	19.6532	98.84%
	SRR8587928	Angus	PRJNA343262	368596237	20.358	99.17%
	SRR8587925	Angus	PRJNA343262	372638480	20.5813	98.91%
	SRR1355237	Angus	PRJNA176557	373818104	20.6464	98.71%
	SRR8588239	Angus	PRJNA343262	377096471	20.8275	98.85%
	SRR8588257	Angus	PRJNA343262	380050410	20.9907	98.86%
	SRR3505366	Angus	PRJNA318087	382868900	21.1463	97.86%
	SRR3506424	Angus	PRJNA318087	389053600	21.4879	97.86%
	SRR3501047	Angus	PRJNA318087	389729427	21.5252	97.93%
	SRR3507147	Angus	PRJNA318087	390641675	21.5756	98.26%
	SRR1425122	Angus	PRJNA176557	391353840	21.615	99.02%
	SRR8587927	Angus	PRJNA343262	391423962	21.6188	98.76%
	SRR3505365	Angus	PRJNA318087	393156113	21.7145	97.99%
	SRR3499149	Angus	PRJNA318087	393677617	21.7433	98.11%
	SAMN05788486	Angus	PRJNA343262	398863709	22.0297	97.74%
	SRR8587922	Angus	PRJNA343262	406113143	22.4301	98.87%
	SRR8587919	Angus	PRJNA343262	411807161	22.7446	98.85%
	SRR1365129	Angus	PRJNA176557	413312126	22.8277	98.25%
	SRR8587924	Angus	PRJNA343262	417658304	23.0678	98.83%
	SRR1365144	Angus	PRJNA176557	428288945	23.6549	98.40%
	SRR1425124	Angus	PRJNA176557	447119895	24.695	98.49%
	SAMN05788483	Angus	PRJNA343262	463365858	25.5923	98.87%
	SRR8587920	Angus	PRJNA343262	488951809	27.0054	97.77%
	SRR8587923	Angus	PRJNA343262	506691143	27.9852	97.75%
	SAMN05788497	Angus	PRJNA343262	516553625	28.5299	98.47%
	SAMN10940522	Angus	PRJNA343262	573716750	31.6871	98.76%
	SAMN10940524	Angus	PRJNA343262	605461043	33.4404	98.45%
	SAMN10940523	Angus	PRJNA343262	605498591	33.4424	99.02%
	SAMN05788511	Angus	PRJNA343262	629728984	34.7807	98.99%
	SAMN05948866	Angus	PRJNA343262	693762441	38.3174	98.91%
	SAMN05788510	Angus	PRJNA343262	733852885	40.5316	99.02%
	SAMN03387020	Angus	PRJNA277147	763360974	42.1614	99.19%
	SAMN08473804	Angus	PRJNA603764	773656040	42.73	99.20%
	SAMN05788482	Angus	PRJNA343262	922940329	50.9751	0.9883
	SAMN05788481	Angus	PRJNA343262	966879432	53.402	0.9885
	SAMN05788479	Angus	PRJNA343262	985258828	54.4171	0.9856
	SRR567198	Angus	PRJNA174819	169087218	9.3389	99.28%
	ERR320251	Ankole	PRJEB1829	347343940	19.1842	98.98%
	ERR320247	Ankole	PRJEB1829	356824020	19.7078	98.89%
	ERR320264	Ankole	PRJEB1829	371776055	20.5337	98.91%
	SRR12452298	Arsi	PRJNA574857	229024913	12.6493	99.01%
	SRR12452217	Arsi	PRJNA574857	251159786	13.8719	99.15%
	SRR12452271	Arsi	PRJNA574857	253126936	13.9805	99.32%
	SRR12452195	Arsi	PRJNA574857	266460396	14.7169	99.12%
	SRR12452228	Arsi	PRJNA574857	280258968	15.4791	99.34%
	SRR12452240	Arsi	PRJNA574857	280977041	15.5187	99.33%
	SRR12452282	Arsi	PRJNA574857	281492310	15.5472	99.35%
	SRR12452293	Arsi	PRJNA574857	297932293	16.4552	99.32%
	SRR12452255	Arsi	PRJNA574857	312579200	17.2641	99.15%
	SRR12452206	Arsi	PRJNA574857	315823801	17.4433	99.15%
	SRR12452248	Barka	PRJNA574857	229208077	12.6594	99.27%
	SRR12452244	Barka	PRJNA574857	255835484	14.1301	99.30%
	SRR12452242	Barka	PRJNA574857	278151771	15.3627	98.90%
	SRR12452245	Barka	PRJNA574857	290693684	16.0554	99.33%
	SRR12452246	Barka	PRJNA574857	293859622	16.2302	99.34%
	SRR12452241	Barka	PRJNA574857	300214629	16.5812	99.35%
	SRR12452247	Barka	PRJNA574857	301982238	16.6789	99.26%
	SRR12452243	Barka	PRJNA574857	309503576	17.0943	98.98%
	SRR12452239	Barka	PRJNA574857	326975420	18.0593	99.05%
	SAMN05216052	Beefmaster	PRJNA324822	213885551	11.8132	99.22%
	SAMN05216055	Beefmaster	PRJNA324822	228870037	12.6408	99.27%
	SAMN05216051	Beefmaster	PRJNA324822	250370840	13.8283	99.26%
	SAMN05216054	Beefmaster	PRJNA324822	313686366	17.3253	99.24%
	SAMN05788551	Beefmaster	PRJNA343262	517327647	28.5727	98.85%
	SAMN05788548	Beefmaster	PRJNA343262	560793059	30.9733	98.92%
	SAMN10940705	Beefmaster	PRJNA343262	560805610	30.974	98.79%
	SAMN05788549	Beefmaster	PRJNA343262	571455465	31.5622	98.86%
	SAMN05788550	Beefmaster	PRJNA343262	597542887	33.003	98.88%
	SAMN05788547	Beefmaster	PRJNA343262	607969947	33.5789	98.88%
	SAMN05788554	Beefmaster	PRJNA343262	614512340	33.9403	98.93%
	SAMN05788553	Beefmaster	PRJNA343262	616332500	34.0408	99.05%
	SAMN05788552	Beefmaster	PRJNA343262	618305849	34.1498	98.87%
	SAMN05216053	Beefmaster	PRJNA324822	623245194	34.4226	99.17%
	SAMN10940704	Beefmaster	PRJNA343262	631735211	34.8915	98.89%
	SAMN09379750	BelgianBlue	PRJNA474946	120262714	6.64226	99.36%
	SAMN09379796	BelgianBlue	PRJNA474946	149307582	8.24644	99.42%
	SAMN09379829	BelgianBlue	PRJNA474946	151055639	8.34299	99.05%
	SAMN09379813	BelgianBlue	PRJNA474946	177443865	9.80045	98.99%
	SAMN09379719	BelgianBlue	PRJNA474946	191641291	10.5846	98.95%
	SAMN09379769	BelgianBlue	PRJNA474946	221624935	12.2406	99.09%
	SAMN09379816	BelgianBlue	PRJNA474946	281794737	15.5639	99.17%
	SRR5507226	BohaiBlackCattle	PRJNA379859	168248618	9.29258	98.65%
	SRR5507224	BohaiBlackCattle	PRJNA379859	186982582	10.3273	98.98%
	SRR5507225	BohaiBlackCattle	PRJNA379859	192971357	10.658	99.00%
	SRR5507223	BohaiBlackCattle	PRJNA379859	193102167	10.6653	86.05%
	SRR3546729	Boran	PRJNA312138	236778162	13.0776	99.31%
	SRR3546728	Boran	PRJNA312138	240944509	13.3077	99.20%
	SRR3546725	Boran	PRJNA312138	241382437	13.3319	99.31%
	SRR3546727	Boran	PRJNA312138	243507242	13.4492	99.34%
	SRR3546777	Boran	PRJNA312138	244396871	13.4983	99.36%
	SRR3508267	Boran	PRJNA312138	245047246	13.5343	99.35%
	SRR3524807	Boran	PRJNA312138	253534152	14.003	99.28%
	SRR3524810	Boran	PRJNA312138	258009537	14.2502	99.01%
	SRR3524756	Boran	PRJNA312138	264570810	14.6126	99.28%
	SRR3546787	Boran	PRJNA312138	274687150	15.1713	97.29%
	SRR2016745	Brahman	PRJNA277147	115113068	6.35784	99.31%
	SRR2016749	Brahman	PRJNA277147	160043771	8.83942	99.14%
	SRR2016795	Brahman	PRJNA277147	168805009	9.32331	99.13%
	SRR2016748	Brahman	PRJNA277147	211487181	11.6807	99.10%
	SRR6650020	Brahman	PRJNA432125	220225247	12.1633	99.80%
	SRR6650031	Brahman	PRJNA432125	349438049	19.2999	99.78%
	SRR6650021	Brahman	PRJNA432125	409652776	22.6256	98.00%
	SRR6650023	Brahman	PRJNA432125	422975663	23.3615	98.69%
	SRR12452233	Butana	PRJNA574857	254357368	14.0485	99.16%
	SRR12452281	Butana	PRJNA574857	254421767	14.052	99.08%
	SRR12452283	Butana	PRJNA574857	257489842	14.2215	98.96%
	SRR12452289	Butana	PRJNA574857	260034867	14.3621	99.09%
	SRR12452294	Butana	PRJNA574857	267407524	14.7693	99.11%
	SRR12452234	Butana	PRJNA574857	268817773	14.8471	99.12%
	SRR12452235	Butana	PRJNA574857	269360445	14.8771	98.95%
	SRR12452237	Butana	PRJNA574857	272228415	15.0355	99.14%
	SRR12452236	Butana	PRJNA574857	273979448	15.1322	99.05%
	SRR12452292	Butana	PRJNA574857	274353431	15.1529	99.15%
	SRR12452284	Butana	PRJNA574857	274431860	15.1572	99.09%
	SRR12452296	Butana	PRJNA574857	289036906	15.9639	99.28%
	SRR12452291	Butana	PRJNA574857	291913318	16.1227	99.12%
	SRR12452295	Butana	PRJNA574857	294167335	16.2472	99.09%
	SRR12452290	Butana	PRJNA574857	311890004	17.2261	99.24%
	SRR12452287	Butana	PRJNA574857	316675746	17.4904	99.39%
	SRR12452238	Butana	PRJNA574857	316898206	17.5027	99.29%
	SRR12452288	Butana	PRJNA574857	318413438	17.5864	99.35%
	SRR12452285	Butana	PRJNA574857	321076059	17.7334	99.25%
	SRR12452286	Butana	PRJNA574857	326477172	18.0317	99.29%
	SRR5507271	ChaidamuYellowCattle	PRJNA379859	171681934	9.48221	98.78%
	SRR5507268	ChaidamuYellowCattle	PRJNA379859	178975204	9.88502	99.05%
	SRR5507272	ChaidamuYellowCattle	PRJNA379859	206660616	11.4141	98.81%
	SRR5507269	ChaidamuYellowCattle	PRJNA379859	224683128	12.4095	98.94%
	SRR866397	Charolais	PRJNA176557	94692329	5.22998	0.9886
	SRR866398	Charolais	PRJNA176557	96512766	5.33052	0.9903
	SRR866395	Charolais	PRJNA176557	97719704	5.39718	98.70%
	SRR866394	Charolais	PRJNA176557	99176410	5.47764	98.90%
	SRR866349	Charolais	PRJNA176557	108272797	5.98004	99.04%
	SRR866331	Charolais	PRJNA176557	109880323	6.06883	99.14%
	SAMN09379830	Charolais	PRJNA474946	122665865	6.77499	98.12%
	SAMN05216033	Charolais	PRJNA324822	128718461	7.10928	99.20%
	SAMN09379814	Charolais	PRJNA474946	146736240	8.10443	98.40%
	SRR1525612	Charolais	PRJNA256210	153833931	8.49644	98.63%
	SRR1525607	Charolais	PRJNA256210	157522538	8.70017	98.83%
	SAMN09379812	Charolais	PRJNA474946	161220469	8.90441	98.40%
	SRR1525602	Charolais	PRJNA256210	161535232	8.92179	98.67%
	SAMN09379736	Charolais	PRJNA474946	168344267	9.29786	98.52%
	SAMN09379805	Charolais	PRJNA474946	174059518	9.61352	98.63%
	SAMN09379749	Charolais	PRJNA474946	177941473	9.82793	98.25%
	SAMN09379811	Charolais	PRJNA474946	180901982	9.99144	96.40%
	SAMN09379704	Charolais	PRJNA474946	181974901	10.0507	98.61%
	SAMN09379762	Charolais	PRJNA474946	184921227	10.2134	98.42%
	SAMN09379735	Charolais	PRJNA474946	188403396	10.4058	98.55%
	SAMN09379765	Charolais	PRJNA474946	189347743	10.4579	79.53%
	SAMN09379729	Charolais	PRJNA474946	196835998	10.8715	98.53%
	SAMN09379781	Charolais	PRJNA474946	209080185	11.5478	97.89%
	SAMN09379716	Charolais	PRJNA474946	209487307	11.5702	98.59%
	SAMN09379740	Charolais	PRJNA474946	209799273	11.5875	98.61%
	SAMN09379799	Charolais	PRJNA474946	209843383	11.5899	98.53%
	SAMN09379705	Charolais	PRJNA474946	210183221	11.6087	98.60%
	SAMN09379798	Charolais	PRJNA474946	213986834	11.8188	98.47%
	SAMN09379826	Charolais	PRJNA474946	214368062	11.8398	98.56%
	SAMN09379783	Charolais	PRJNA474946	217873702	12.0334	73.82%
	SAMN09379733	Charolais	PRJNA474946	220412910	12.1737	98.62%
	SAMN09379742	Charolais	PRJNA474946	221267194	12.2209	98.57%
	SAMN09379802	Charolais	PRJNA474946	223386848	12.3379	98.67%
	SAMN09379779	Charolais	PRJNA474946	224267930	12.3866	86.21%
	SAMN09379744	Charolais	PRJNA474946	229863588	12.6957	98.43%
	SRR8587969	Charolais	PRJNA343262	233080607	12.8733	98.98%
	SAMN09379794	Charolais	PRJNA474946	233840380	12.9153	98.64%
	SAMN09379746	Charolais	PRJNA474946	239678970	13.2378	98.45%
	SAMN09379725	Charolais	PRJNA474946	243823567	13.4667	98.52%
	SAMN05216037	Charolais	PRJNA324822	244164488	13.4855	99.15%
	SAMN05216034	Charolais	PRJNA324822	244426866	13.5	99.15%
	SAMN09379707	Charolais	PRJNA474946	253606991	14.007	98.72%
	SAMN09379771	Charolais	PRJNA474946	263493861	14.5531	88.01%
	SRR8588079	Charolais	PRJNA343262	266003822	14.6917	98.91%
	SAMN09379764	Charolais	PRJNA474946	266090430	14.6965	98.50%
	SAMN05216038	Charolais	PRJNA324822	269956024	14.91	99.14%
	SRR1348574	Charolais	PRJNA176557	275373793	15.2092	98.04%
	SAMN09379760	Charolais	PRJNA474946	276146932	15.2519	98.37%
	SRR1343169	Charolais	PRJNA176557	276390233	15.2654	98.30%
	SAMN09379803	Charolais	PRJNA474946	279065788	15.4132	98.43%
	SAMN09379713	Charolais	PRJNA474946	279757778	15.4514	98.55%
	SRR1348584	Charolais	PRJNA176557	281827859	15.5657	98.24%
	SRR1355254	Charolais	PRJNA176557	285148713	15.7491	98.09%
	SAMN09379738	Charolais	PRJNA474946	294029012	16.2396	98.37%
	SRR8587976	Charolais	PRJNA343262	294992008	16.2928	98.97%
	SRR1348577	Charolais	PRJNA176557	296026645	16.3499	98.01%
	SAMN09379747	Charolais	PRJNA474946	296220097	16.3606	98.46%
	SRR1343173	Charolais	PRJNA176557	305047603	16.8482	98.85%
	SAMN09379761	Charolais	PRJNA474946	306760010	16.9427	98.38%
	SRR1343171	Charolais	PRJNA176557	313771547	17.33	98.83%
	SRR1343168	Charolais	PRJNA176557	313826909	17.3331	98.78%
	SAMN09379801	Charolais	PRJNA474946	319763203	17.6609	98.24%
	SRR1355253	Charolais	PRJNA176557	326380465	18.0264	98.30%
	SAMN09379720	Charolais	PRJNA474946	336691076	18.5959	98.44%
	SRR1348578	Charolais	PRJNA176557	340117852	18.7851	98.31%
	SAMN05216036	Charolais	PRJNA324822	368467434	20.3509	99.12%
	SRR1343167	Charolais	PRJNA176557	374958859	20.7094	99.00%
	SRR1348571	Charolais	PRJNA176557	376735814	20.8076	98.85%
	SAMN09379821	Charolais	PRJNA474946	381106246	21.049	98.31%
	SAMN09379728	Charolais	PRJNA474946	390736101	21.5808	98.62%
	SRR1365122	Charolais	PRJNA176557	395379932	21.8373	98.25%
	SAMN05216035	Charolais	PRJNA324822	401397744	22.1697	99.29%
	SRR1365145	Charolais	PRJNA176557	427579789	23.6158	98.24%
	SRR1355258	Charolais	PRJNA176557	429988301	23.7488	98.01%
	SAMN10940550	Charolais	PRJNA343262	456867313	25.2334	92.69%
	SAMN09379712	Charolais	PRJNA474946	463112120	25.5783	98.39%
	SAMN10940551	Charolais	PRJNA343262	515900917	28.4939	98.94%
	SAMN10940555	Charolais	PRJNA343262	518678029	28.6472	98.96%
	SAMN10940553	Charolais	PRJNA343262	522733529	28.8712	98.96%
	SAMN10940554	Charolais	PRJNA343262	581056118	32.0925	98.96%
	SAMN10940548	Charolais	PRJNA343262	591685211	32.6795	95.14%
	SAMN10940549	Charolais	PRJNA343262	594448584	32.8321	96.98%
	SAMN10940552	Charolais	PRJNA343262	595591047	32.8952	98.95%
	SAMN10940547	Charolais	PRJNA343262	598910350	33.0786	98.32%
	SAMN10940556	Charolais	PRJNA343262	601062677	33.1974	98.81%
	SAMN10940546	Charolais	PRJNA343262	610574277	33.7228	98.47%
	SRR8396974	Charolais-RedAngus	PRJNA513064	114378566	6.31727	99.22%
	SRR5507192	DabieshanCattle	PRJNA379859	165660072	9.14961	98.86%
	SRR6234767	Dengchuan	PRJNA396672	303313149	16.7524	98.98%
	SRR6234766	Dengchuan	PRJNA396672	309857143	17.1138	99.08%
	SRR6024565	DianzhongCattle	PRJNA379859	154436554	8.52972	98.68%
	SRR6024566	DianzhongCattle	PRJNA379859	162026649	8.94893	98.27%
	SRR6024564	DianzhongCattle	PRJNA379859	165974393	9.16697	99.05%
	SRR6024567	DianzhongCattle	PRJNA379859	167346534	9.24276	98.71%
	SRR6024568	DianzhongCattle	PRJNA379859	169339296	9.35282	98.84%
	SRR6024563	DianzhongCattle	PRJNA379859	180373830	9.96227	99.09%
	Bostaurus_K894-01-R09_good	Enshi	PRJNA762638	150747610	8.32598	97.99%
	Bostaurus_K894-01-R04_good	Enshi	PRJNA762638	151602734	8.37321	98.06%
	Bostaurus_K894-01-R10_good	Enshi	PRJNA762638	153483303	8.47707	97.81%
	Bostaurus_K894-01-R02_good	Enshi	PRJNA762638	176466790	9.74648	99.04%
	Bostaurus_K894-01-R07_good	Enshi	PRJNA762638	180929293	9.99295	98.69%
	Bostaurus_K894-01-R03_good	Enshi	PRJNA762638	181245143	10.0104	97.32%
	Bostaurus_K894-01-R06_good	Enshi	PRJNA762638	184313297	10.1799	98.86%
	Bostaurus_K894-01-R01_good	Enshi	PRJNA762638	186555769	10.3037	98.79%
	Bostaurus_K894-01-R08_good	Enshi	PRJNA762638	190177840	10.5038	99.24%
	Bostaurus_K894-01-R05_good	Enshi	PRJNA762638	195107814	10.776	97.40%
	SRR12452274	EthiopianBoran	PRJNA574857	235618847	13.0135	99.34%
	SRR12452273	EthiopianBoran	PRJNA574857	245582895	13.5639	99.06%
	SRR12452272	EthiopianBoran	PRJNA574857	252828882	13.9641	99.01%
	SRR12452276	EthiopianBoran	PRJNA574857	259969228	14.3584	99.34%
	SRR12452270	EthiopianBoran	PRJNA574857	272077803	15.0272	99.02%
	SRR12452275	EthiopianBoran	PRJNA574857	281341645	15.5389	98.99%
	SRR12452278	EthiopianBoran	PRJNA574857	284234756	15.6986	99.31%
	SRR12452279	EthiopianBoran	PRJNA574857	297350443	16.423	99.37%
	SRR12452277	EthiopianBoran	PRJNA574857	307525150	16.985	99.25%
	SRR12452280	EthiopianBoran	PRJNA574857	315187683	17.4082	99.32%
	SRR12452262	Fogera	PRJNA574857	255061044	14.0873	99.04%
	SRR12452186	Fogera	PRJNA574857	272398269	15.0449	99.11%
	SRR12452187	Fogera	PRJNA574857	290759919	16.059	99.27%
	SRR12452185	Fogera	PRJNA574857	292029568	16.1292	99.27%
	SRR12452263	Fogera	PRJNA574857	298307735	16.4759	99.34%
	SRR12452188	Fogera	PRJNA574857	301069746	16.6285	99.30%
	SRR12452261	Fogera	PRJNA574857	306630060	16.9356	99.04%
	SRR12452297	Fogera	PRJNA574857	320948043	17.7264	99.32%
	SRR1343166	Gelbvieh	PRJNA176557	240609908	13.2892	98.77%
	SRR1343161	Gelbvieh	PRJNA176557	280448354	15.4895	98.92%
	SRR1355236	Gelbvieh	PRJNA176557	385380161	21.285	95.86%
	SRR1355260	Gelbvieh	PRJNA176557	450835064	24.9002	98.90%
	SRR2016755	Gir	PRJNA277147	162999551	9.00267	99.14%
	SRR2016754	Gir	PRJNA277147	258622675	14.2841	99.36%
	SRR2016752	Gir	PRJNA277147	333185251	18.4022	99.06%
	SRR12452229	Goffa	PRJNA574857	207363776	11.453	98.99%
	SRR12452266	Goffa	PRJNA574857	228165856	12.6019	99.28%
	SRR12452227	Goffa	PRJNA574857	237568631	13.1212	99.04%
	SRR12452232	Goffa	PRJNA574857	287843385	15.8979	98.89%
	SRR12452265	Goffa	PRJNA574857	290822606	16.0625	99.15%
	SRR12452267	Goffa	PRJNA574857	292442159	16.1519	99.33%
	SRR12452230	Goffa	PRJNA574857	295680285	16.3308	99.05%
	SRR12452268	Goffa	PRJNA574857	306878185	16.9493	99.36%
	SRR12452269	Goffa	PRJNA574857	307998583	17.0111	99.03%
	SRR12452231	Goffa	PRJNA574857	311881155	17.2256	99.10%
	SRR5507284	GuangfengCattle	PRJNA379859	167400492	9.24574	99.05%
	SRR5507286	GuangfengCattle	PRJNA379859	171352295	9.464	99.10%
	SRR5507285	GuangfengCattle	PRJNA379859	184160741	10.1714	99.15%
	SRR5507283	GuangfengCattle	PRJNA379859	206003111	11.3778	99.11%
	SRR934397	Hanwoo	PRJNA210523	210310261	11.6157	98.82%
	SAMN03839032	Hanwoo	PRJNA288838	227583622	12.5697	98.89%
	SRR934395	Hanwoo	PRJNA210523	241005531	13.311	98.84%
	SRR934403	Hanwoo	PRJNA210523	259247886	14.3186	98.78%
	SRR934399	Hanwoo	PRJNA210523	264005559	14.5814	98.89%
	SRR926762	Hanwoo	PRJNA210523	270042948	14.9148	98.91%
	SRR934402	Hanwoo	PRJNA210523	279941007	15.4615	98.44%
	SRR934404	Hanwoo	PRJNA210523	290808029	16.0617	99.32%
	SRR934436	Hanwoo	PRJNA210523	297302526	16.4204	99.02%
	SRR934435	Hanwoo	PRJNA210523	299140823	16.5219	98.85%
	SRR934437	Hanwoo	PRJNA210523	305292765	16.8617	98.82%
	SRR934400	Hanwoo	PRJNA210523	306906616	16.9508	99.31%
	SRR934433	Hanwoo	PRJNA210523	324345328	17.914	98.31%
	SRR934434	Hanwoo	PRJNA210523	326742641	18.0464	98.94%
	SRR934419	Hanwoo	PRJNA210523	328973150	18.1696	98.91%
	SRR934417	Hanwoo	PRJNA210523	338175395	18.6778	99.08%
	SRR934415	Hanwoo	PRJNA210523	341882023	18.8826	99.06%
	SRR934401	Hanwoo	PRJNA210523	346744260	19.1511	99.16%
	SRR934418	Hanwoo	PRJNA210523	349295901	19.292	98.95%
	SRR934432	Hanwoo	PRJNA210523	350480088	19.3575	98.81%
	SRR934416	Hanwoo	PRJNA210523	354505963	19.5798	98.93%
	SRR866340	Hereford	PRJNA176557	113823294	6.2866	98.71%
	SRR866420	Hereford	PRJNA176557	118674656	6.55455	97.26%
	SAMN09379721	Hereford	PRJNA474946	128641386	7.10502	98.73%
	SRR866426	Hereford	PRJNA176557	148545126	8.20433	97.25%
	SAMN09379714	Hereford	PRJNA474946	151127081	8.34694	98.71%
	SRR866421	Hereford	PRJNA176557	163026220	9.00414	97.81%
	SRR4280237	Hereford	PRJNA343262	164921820	9.10884	98.96%
	SAMN09379808	Hereford	PRJNA474946	168447027	9.30354	98.57%
	SRR8588021	Hereford	PRJNA343262	170924681	9.44038	98.47%
	SRR8588151	Hereford	PRJNA343262	192841081	10.6509	98.99%
	SAMN09379697	Hereford	PRJNA474946	193261641	10.6741	98.68%
	SAMN09379795	Hereford	PRJNA474946	202237449	11.1698	98.53%
	SAMN09379727	Hereford	PRJNA474946	202665026	11.1934	98.71%
	SAMN09379755	Hereford	PRJNA474946	209372584	11.5639	98.47%
	SRR1343163	Hereford	PRJNA176557	213922333	11.8152	93.71%
	SAMN05216018	Hereford	PRJNA324822	215075847	11.8789	99.25%
	SAMN05216020	Hereford	PRJNA324822	218225863	12.0529	99.32%
	SRR4280239	Hereford	PRJNA343262	225306917	12.444	99.02%
	SRR1365133	Hereford	PRJNA176557	225513572	12.4554	98.19%
	SAMN09379743	Hereford	PRJNA474946	226045192	12.4848	98.51%
	SAMN09379754	Hereford	PRJNA474946	235498073	13.0069	68.58%
	SRR7790708	Hereford	PRJNA325058	235836397	13.0255	97.50%
	SRR1462188	Hereford	PRJNA176557	244902527	13.5263	98.86%
	SAMN09379810	Hereford	PRJNA474946	250902186	13.8576	98.42%
	SRR8324589	Hereford	PRJNA494431	256044014	14.1416	99.45%
	SRR4280236	Hereford	PRJNA343262	256336833	14.1578	98.91%
	SAMN05216019	Hereford	PRJNA324822	260147408	14.3683	99.28%
	SRR8324575	Hereford	PRJNA494431	267445281	14.7713	99.48%
	SRR2226524	Hereford	PRJNA294306	268637995	14.8372	99.46%
	SRR1343160	Hereford	PRJNA176557	272061517	15.0263	98.83%
	SRR8324595	Hereford	PRJNA494431	272523354	15.0518	99.50%
	SAMN05216015	Hereford	PRJNA324822	273460553	15.1036	99.25%
	SAMN09379753	Hereford	PRJNA474946	275274979	15.2038	98.46%
	SRR8324573	Hereford	PRJNA494431	278198359	15.3652	99.41%
	SAMN09379763	Hereford	PRJNA474946	278565550	15.3855	98.80%
	SAMN09379790	Hereford	PRJNA474946	283713306	15.6698	88.78%
	SAMN09379701	Hereford	PRJNA474946	284366163	15.7059	98.62%
	SRR8324580	Hereford	PRJNA494431	285090686	15.7459	99.43%
	SRR4280238	Hereford	PRJNA343262	286115472	15.8025	98.97%
	SRR8324581	Hereford	PRJNA494431	287631469	15.8862	99.47%
	SRR1346381	Hereford	PRJNA176557	287867064	15.8993	98.12%
	SRR1365109	Hereford	PRJNA176557	291739464	16.1131	97.76%
	SRR8324574	Hereford	PRJNA494431	292372163	16.1481	99.45%
	SRR1346383	Hereford	PRJNA176557	293168570	16.1921	98.23%
	SAMN09379751	Hereford	PRJNA474946	293315253	16.2002	98.50%
	SRR8324576	Hereford	PRJNA494431	295272225	16.3083	99.47%
	SRR1346382	Hereford	PRJNA176557	296544139	16.3785	94.11%
	SRR8324577	Hereford	PRJNA494431	299838893	16.5605	99.28%
	SRR1346385	Hereford	PRJNA176557	302308613	16.6969	98.23%
	SRR8324578	Hereford	PRJNA494431	303272213	16.7501	99.50%
	SRR1346384	Hereford	PRJNA176557	304511555	16.8186	97.65%
	SRR8324583	Hereford	PRJNA494431	305700025	16.8842	99.41%
	SRR1365111	Hereford	PRJNA176557	307511703	16.9843	96.53%
	SRR1346387	Hereford	PRJNA176557	316037952	17.4552	98.57%
	SRR1365105	Hereford	PRJNA176557	318821011	17.6089	92.96%
	SRR1346380	Hereford	PRJNA176557	319608479	17.6524	98.24%
	SRR8324570	Hereford	PRJNA494431	323725048	17.8797	99.49%
	SRR8324579	Hereford	PRJNA494431	325528626	17.9794	99.44%
	SRR1365140	Hereford	PRJNA176557	327896124	18.1101	98.30%
	SRR1365139	Hereford	PRJNA176557	333824079	18.4375	98.60%
	SRR1365137	Hereford	PRJNA176557	338779870	18.7112	98.63%
	SRR2226513	Hereford	PRJNA294306	339317109	18.7409	99.28%
	SRR1365110	Hereford	PRJNA176557	341636441	18.869	98.33%
	SRR1348590	Hereford	PRJNA176557	345253018	19.0688	98.58%
	SRR1365107	Hereford	PRJNA176557	345796691	19.0988	92.61%
	SRR1365106	Hereford	PRJNA176557	357362791	19.7376	98.86%
	SRR1348589	Hereford	PRJNA176557	359238757	19.8412	98.28%
	SRR8324572	Hereford	PRJNA494431	359269235	19.8429	99.29%
	SRR2226514	Hereford	PRJNA294306	363695469	20.0874	99.09%
	SAMN05216017	Hereford	PRJNA324822	364023598	20.1055	99.16%
	SRR8587930	Hereford	PRJNA343262	387127400	21.3815	94.33%
	SRR8324568	Hereford	PRJNA494431	400959630	22.1455	99.49%
	SRR1365128	Hereford	PRJNA176557	405319691	22.3863	98.58%
	SRR1365124	Hereford	PRJNA176557	405560195	22.3996	98.48%
	SRR1365126	Hereford	PRJNA176557	418982285	23.1409	98.52%
	SRR1365131	Hereford	PRJNA176557	421002293	23.2525	98.60%
	SRR1355261	Hereford	PRJNA176557	426313602	23.5458	98.69%
	SRR1365142	Hereford	PRJNA176557	439769988	24.289	98.30%
	SAMN05788559	Hereford	PRJNA343262	440573369	24.3334	98.98%
	SAMN05788536	Hereford	PRJNA343262	441108731	24.363	98.22%
	SAMN05216016	Hereford	PRJNA324822	470205015	25.97	99.21%
	SAMN05788557	Hereford	PRJNA343262	550359673	30.3971	98.91%
	SAMN05788556	Hereford	PRJNA343262	551640033	30.4678	99.14%
	SAMN05788555	Hereford	PRJNA343262	556912225	30.759	96.80%
	SAMN10940541	Hereford	PRJNA343262	558847162	30.8658	97.94%
	SAMN05788534	Hereford	PRJNA343262	561374649	31.0054	98.63%
	SAMN10598558	Hereford	PRJNA494431	565460924	31.2311	99.43%
	SAMN05788537	Hereford	PRJNA343262	570487443	31.5087	97.28%
	SAMN05788558	Hereford	PRJNA343262	571053945	31.54	98.94%
	SAMN10940543	Hereford	PRJNA343262	583072763	32.2038	98.56%
	SAMN05788538	Hereford	PRJNA343262	593241234	32.7655	97.23%
	SAMN05788539	Hereford	PRJNA343262	601063762	33.1975	98.43%
	SAMN10940542	Hereford	PRJNA343262	601822955	33.2394	98.06%
	SAMN05788507	Hereford	PRJNA343262	606940926	33.5221	94.82%
	SAMN05788535	Hereford	PRJNA343262	608029078	33.5822	98.78%
	SAMN05788540	Hereford	PRJNA343262	614583988	33.9442	98.97%
	SAMN05788531	Hereford	PRJNA343262	631443016	34.8754	99.09%
	SRR7340737	Holstein	PRJNA431934	92017593	5.08225	0.989
	SRR7340752	Holstein	PRJNA431934	100191403	5.5337	97.53%
	SRR4435587	Holstein	PRJNA349121	109656119	6.05644	99.06%
	SRR7340805	Holstein	PRJNA431934	110206729	6.08686	98.34%
	SRR7340700	Holstein	PRJNA431934	113690173	6.27925	98.20%
	SRR1262538	Holstein	PRJNA238491	120790742	6.67142	99.15%
	SRR7340675	Holstein	PRJNA431934	127614870	7.04833	98.14%
	SRR1262663	Holstein	PRJNA238491	131212606	7.24704	99.77%
	SRR1262539	Holstein	PRJNA238491	135119968	7.46284	99.29%
	SRR1262724	Holstein	PRJNA238491	139633986	7.71216	99.13%
	SRR7340757	Holstein	PRJNA431934	139794354	7.72102	98.69%
	SRR4280177	Holstein	PRJNA343262	141753552	7.82923	99.27%
	SRR2016797	Holstein	PRJNA277147	141842549	7.83414	99.26%
	SRR4279978	Holstein	PRJNA343262	143459615	7.92345	98.94%
	SRR7340672	Holstein	PRJNA431934	143737222	7.93879	98.02%
	SRR1262662	Holstein	PRJNA238491	144177581	7.96311	99.35%
	SRR1262536	Holstein	PRJNA238491	144982524	8.00757	98.99%
	SRR1262660	Holstein	PRJNA238491	145574587	8.04027	99.49%
	SRR7340722	Holstein	PRJNA431934	152862031	8.44276	97.82%
	SRR7340674	Holstein	PRJNA431934	153147005	8.4585	98.14%
	SRR7340756	Holstein	PRJNA431934	153541652	8.4803	98.55%
	SRR4279977	Holstein	PRJNA343262	158072432	8.73054	96.77%
	SRR1262533	holstein	PRJNA238491	159303426	8.79853	99.50%
	SRR7340754	Holstein	PRJNA431934	160598119	8.87003	98.54%
	SRR4279979	Holstein	PRJNA343262	160798040	8.88108	96.88%
	SRR7340802	Holstein	PRJNA431934	161539852	8.92205	98.16%
	SRR7340726	Holstein	PRJNA431934	163367877	9.02301	97.99%
	SRR7340673	Holstein	PRJNA431934	165704881	9.15209	98.53%
	SRR4280060	Holstein	PRJNA343262	166262981	9.18291	99.13%
	SRR1262728	Holstein	PRJNA238491	166565934	9.19964	98.88%
	SRR7340753	Holstein	PRJNA431934	167522596	9.25248	97.42%
	SRR1425161	Holstein	PRJNA176557	171989327	9.49919	98.37%
	SRR7340671	Holstein	PRJNA431934	171997102	9.49961	98.34%
	SRR7340750	Holstein	PRJNA431934	173068839	9.55881	98.43%
	SRR7340677	Holstein	PRJNA431934	173998629	9.61016	98.21%
	SRR7340751	Holstein	PRJNA431934	175661670	9.70201	97.57%
	SRR7340798	Holstein	PRJNA431934	180003360	9.94181	97.72%
	SRR7340801	Holstein	PRJNA431934	180214071	9.95345	98.34%
	SRR7340804	Holstein	PRJNA431934	180665247	9.97837	98.03%
	SRR7340830	Holstein	PRJNA431934	181685920	10.0347	97.98%
	SRR7340758	Holstein	PRJNA431934	186017121	10.274	98.49%
	SRR7340800	Holstein	PRJNA431934	193317312	10.6772	96.79%
	SRR7340796	Holstein	PRJNA431934	202513251	11.1851	98.13%
	SRR2016769	Holstein	PRJNA277147	206487324	11.4046	97.95%
	SRR1346386	Holstein	PRJNA176557	208437895	11.5123	98.17%
	SRR1262788	Holstein	PRJNA238491	211989009	11.7084	99.75%
	SRR7340729	Holstein	PRJNA431934	213119729	11.7709	98.41%
	SRR1262664	Holstein	PRJNA238491	226511180	12.5105	99.46%
	SRR7340705	Holstein	PRJNA431934	243821532	13.4666	96.51%
	SRR7340703	Holstein	PRJNA431934	253789903	14.0171	95.78%
	SRR2016771	Holstein	PRJNA277147	256407786	14.1617	98.90%
	SRR7340734	Holstein	PRJNA431934	257291474	14.2105	99.20%
	SRR2770344	Holstein	PRJNA299394	263667051	14.5627	96.63%
	SRR6116785	Holstein	PRJNA299394	263667051	14.5627	96.63%
	SRR1262679	Holstein	PRJNA238491	267317730	14.7643	99.63%
	SRR1262725	Holstein	PRJNA238491	268193128	14.8126	99.00%
	SRR1346392	Holstein	PRJNA176557	268277667	14.8173	98.56%
	SRR7340829	Holstein	PRJNA431934	271196151	14.9785	99.20%
	SRR1262672	Holstein	PRJNA238491	274140875	15.1411	99.66%
	SRR934405	Holstein	PRJNA210521	274384933	15.1546	98.40%
	SRR1262661	Holstein	PRJNA238491	275102201	15.1942	99.80%
	SRR7340855	Holstein	PRJNA431934	280651848	15.5008	98.79%
	SRR7340735	Holstein	PRJNA431934	281761689	15.5621	99.00%
	SRR1262770	Holstein	PRJNA238491	284290310	15.7017	96.92%
	SRR7340850	Holstein	PRJNA431934	286614741	15.8301	98.65%
	SRR1262776	Holstein	PRJNA238491	288017999	15.9076	97.35%
	SRR1262777	Holstein	PRJNA238491	289106890	15.9677	97.43%
	SRR7340718	Holstein	PRJNA431934	289910866	16.0121	98.58%
	SRR7340701	Holstein	PRJNA431934	290798445	16.0612	95.83%
	SRR7340803	Holstein	PRJNA431934	295257275	16.3074	99.27%
	SRR7340706	Holstein	PRJNA431934	298299132	16.4754	95.20%
	SRR7340688	Holstein	PRJNA431934	299107497	16.5201	96.44%
	SRR7340724	Holstein	PRJNA431934	300989171	16.624	99.05%
	SRR7340847	Holstein	PRJNA431934	302652662	16.7159	98.90%
	SRR1425139	Holstein	PRJNA176557	307496929	16.9834	97.12%
	SRR1425164	Holstein	PRJNA176557	307721075	16.9958	98.34%
	SRR1262756	Holstein	PRJNA238491	307926030	17.0071	98.27%
	SRR7340755	Holstein	PRJNA431934	310914288	17.1722	98.70%
	SRR7340702	Holstein	PRJNA431934	311570955	17.2085	96.45%
	SRR1262736	Holstein	PRJNA238491	312303850	17.2489	98.73%
	SRR8588198	Holstein	PRJNA343262	313467845	17.3132	96.57%
	SRR1262727	Holstein	PRJNA238491	313995010	17.3423	98.73%
	SRR7340731	Holstein	PRJNA431934	314852631	17.3897	98.65%
	SRR1425160	Holstein	PRJNA176557	315117390	17.4043	97.32%
	SRR4435546	Holstein	PRJNA349121	318200835	17.5746	98.81%
	SRR7340832	Holstein	PRJNA431934	319002841	17.6189	99.37%
	SRR1262787	Holstein	PRJNA238491	319090843	17.6238	99.68%
	SRR7340670	Holstein	PRJNA431934	319567897	17.6501	99.53%
	SRR1425137	Holstein	PRJNA176557	320567363	17.7053	97.26%
	SRR8588199	Holstein	PRJNA343262	320627479	17.7087	96.18%
	SRR1425140	Holstein	PRJNA176557	321564171	17.7604	97.15%
	SRR8588190	Holstein	PRJNA343262	322720971	17.8243	96.03%
	SRR1348592	Holstein	PRJNA176557	326653254	18.0415	98.99%
	SRR7340852	Holstein	PRJNA431934	326738059	18.0462	98.85%
	SRR1262738	Holstein	PRJNA238491	328628074	18.1505	98.98%
	SRR1262737	Holstein	PRJNA238491	329878733	18.2196	99.07%
	SRR7340736	Holstein	PRJNA431934	331187144	18.2919	98.17%
	SRR1425165	Holstein	PRJNA176557	331608463	18.3151	98.33%
	SRR8587918	Holstein	PRJNA343262	334437292	18.4714	96.06%
	SRR1425138	Holstein	PRJNA176557	334806803	18.4918	97.68%
	SRR1346389	Holstein	PRJNA176557	335471598	18.5285	98.23%
	SRR1365104	Holstein	PRJNA176557	335685295	18.5403	98.59%
	SRR1346390	Holstein	PRJNA176557	340596860	18.8116	98.26%
	SRR1365114	Holstein	PRJNA176557	340959543	18.8316	96.22%
	SRR8587916	Holstein	PRJNA343262	342421158	18.9123	96.05%
	SRR8587999	Holstein	PRJNA343262	343955907	18.9971	96.03%
	SRR1262726	Holstein	PRJNA238491	343978692	18.9984	98.93%
	SRR8588200	Holstein	PRJNA343262	346782332	19.1532	95.68%
	SRR8587907	Holstein	PRJNA343262	349710098	19.3149	95.78%
	SRR1262718	Holstein	PRJNA238491	355656597	19.6434	98.59%
	SRR8587906	Holstein	PRJNA343262	358134812	19.7802	95.38%
	SRR8587904	Holstein	PRJNA343262	363878350	20.0975	95.24%
	SRR8587917	Holstein	PRJNA343262	370444408	20.4601	95.68%
	SRR8588194	Holstein	PRJNA343262	370741144	20.4765	95.13%
	SRR1425156	Holstein	PRJNA176557	370767467	20.478	98.75%
	SRR1425166	Holstein	PRJNA176557	372912646	20.5964	98.65%
	SRR8588085	Holstein	PRJNA343262	373402593	20.6235	95.35%
	SRR8588195	Holstein	PRJNA343262	374359334	20.6763	95.10%
	SRR8587910	Holstein	PRJNA343262	381580930	21.0752	94.88%
	SRR1425157	Holstein	PRJNA176557	384988977	21.2634	97.57%
	SRR1425163	Holstein	PRJNA176557	396073093	21.8756	98.46%
	SRR1425159	Holstein	PRJNA176557	396456663	21.8968	98.45%
	SRR1425158	Holstein	PRJNA176557	400503680	22.1203	97.53%
	SRR1425155	Holstein	PRJNA176557	403611335	22.292	98.58%
	SRR1425134	Holstein	PRJNA176557	423412399	23.3856	98.28%
	SRR1425133	Holstein	PRJNA176557	431815837	23.8497	98.21%
	SRR1425144	Holstein	PRJNA176557	434368434	23.9907	98.53%
	SRR1365147	Holstein	PRJNA176557	437967676	24.1895	98.15%
	SRR11235444	Holstein	PRJNA610216	475509062	26.263	99.45%
	SRR11235445	Holstein	PRJNA610216	559289643	30.8903	99.61%
	SRR12452260	Horro	PRJNA574857	204426670	11.2907	99.33%
	SRR12452251	Horro	PRJNA574857	207174547	11.4425	98.99%
	SRR12452254	Horro	PRJNA574857	217805735	12.0297	99.30%
	SRR12452257	Horro	PRJNA574857	222514146	12.2897	99.29%
	SRR12452256	Horro	PRJNA574857	242998548	13.4211	98.12%
	SRR12452259	Horro	PRJNA574857	251244238	13.8765	99.24%
	SRR12452253	Horro	PRJNA574857	273539897	15.108	99.22%
	SRR12452252	Horro	PRJNA574857	276324225	15.2617	99.22%
	SRR12452250	Horro	PRJNA574857	286264536	15.8107	98.93%
	SRR12452249	Horro	PRJNA574857	288790798	15.9503	98.50%
	SRR12452258	Horro	PRJNA574857	302404464	16.7022	99.35%
	SRR2016773	Jersey	PRJNA277147	94997787	5.24685	0.9935
	SRR2016799	Jersey	PRJNA277147	100688026	5.56113	99.38%
	SRR1262796	Jersey	PRJNA238491	154125231	8.51253	99.01%
	SRR1262794	Jersey	PRJNA238491	160269043	8.85186	98.58%
	SAMN05788517	Jersey	PRJNA343262	161537849	8.92194	99.53%
	SRR1262792	Jersey	PRJNA238491	172350002	9.51911	98.58%
	SRR1262800	Jersey	PRJNA238491	179183471	9.89653	98.70%
	SRR1262795	Jersey	PRJNA238491	183023334	10.1086	98.91%
	SAMN05788516	Jersey	PRJNA343262	194043124	10.7172	99.40%
	SRR2016774	Jersey	PRJNA277147	195280953	10.7856	99.40%
	SRR1262790	Jersey	PRJNA238491	214058237	11.8227	99.13%
	SRR1262789	Jersey	PRJNA238491	225389409	12.4485	99.20%
	SRR1262791	Jersey	PRJNA238491	241099979	13.3163	99.36%
	SRR2016776	Jersey	PRJNA277147	247267178	13.6569	99.36%
	SRR1262803	Jersey	PRJNA238491	268025137	14.8034	99.48%
	SRR1262797	Jersey	PRJNA238491	276021195	15.245	98.30%
	SRR1262802	Jersey	PRJNA238491	283000977	15.6305	99.45%
	SAMN05788518	Jersey	PRJNA343262	283543437	15.6605	99.40%
	SRR1262799	Jersey	PRJNA238491	290837698	16.0633	99.69%
	SRR1262801	Jersey	PRJNA238491	299616518	16.5482	97.37%
	SRR1262793	Jersey	PRJNA238491	347704197	19.2041	99.15%
	SRR8588176	Jersey	PRJNA343262	353996350	19.5517	99.11%
	SRR8588175	Jersey	PRJNA343262	453371531	25.0403	99.08%
	SRR8588062	Jersey	PRJNA343262	503599467	27.8144	99.06%
	SRR5507281	JianCattle	PRJNA379859	177041701	9.77823	99.03%
	SRR5507280	JianCattle	PRJNA379859	191360985	10.5691	99.10%
	SRR5507282	JianCattle	PRJNA379859	198558886	10.9667	99.11%
	SRR5507279	JianCattle	PRJNA379859	207247311	11.4465	99.19%
	SRR5507230	JiaxianRedCattle	PRJNA379859	204264148	11.2818	98.90%
	SRR5507231	JiaxianRedCattle	PRJNA379859	219937481	12.1474	99.06%
	SRR5507229	JiaxianRedCattle	PRJNA379859	249641022	13.788	99.15%
	SRR5507275	JinjiangCattle	PRJNA379859	174659587	9.64667	98.97%
	SRR5507278	JinjiangCattle	PRJNA379859	190791562	10.5377	99.01%
	SRR5507252	KazakhCattle	PRJNA379859	173552236	9.58551	99.05%
	SRR5507254	KazakhCattle	PRJNA379859	178578707	9.86313	99.10%
	SRR5507255	KazakhCattle	PRJNA379859	185204569	10.2291	99.12%
	SRR5507257	KazakhCattle	PRJNA379859	196557945	10.8561	98.93%
	SRR5507253	KazakhCattle	PRJNA379859	202980184	11.2108	99.04%
	SRR5507256	KazakhCattle	PRJNA379859	204699964	11.3058	99.05%
	SRR5507259	KazakhCattle	PRJNA379859	214330050	11.8377	99.16%
	SRR5507260	KazakhCattle	PRJNA379859	230071489	12.7071	99.17%
	SRR3694656	KENANA	PRJNA312138	193950538	10.7121	99.33%
	SRR12452226	Kenana	PRJNA574857	248111691	13.7035	98.65%
	SRR3694657	KENANA	PRJNA312138	254048624	14.0314	99.24%
	SRR3694651	KENANA	PRJNA312138	257777753	14.2374	99.18%
	SRR3694658	KENANA	PRJNA312138	257856820	14.2418	99.00%
	SRR3694659	KENANA	PRJNA312138	258955800	14.3025	99.27%
	SRR3694653	KENANA	PRJNA312138	260235325	14.3731	99.33%
	SRR3694652	KENANA	PRJNA312138	261421356	14.4386	99.30%
	SRR12452223	Kenana	PRJNA574857	278756226	15.3961	99.14%
	SRR12452225	Kenana	PRJNA574857	283694942	15.6688	99.16%
	SRR12452224	Kenana	PRJNA574857	292245054	16.1411	99.30%
	SRR5507188	LeiqiongCattle	PRJNA379859	194217075	10.7269	98.91%
	SRR5507189	LeiqiongCattle	PRJNA379859	203645684	11.2476	98.72%
	SRR5507190	LeiqiongCattle	PRJNA379859	209708265	11.5824	98.45%
	SRR866387	Limousin	PRJNA176557	96425777	5.32572	0.9866
	SRR866392	Limousin	PRJNA176557	97440945	5.38179	98.89%
	SRR8727721	Limousin	PRJNA526664	99661989	5.50446	99.09%
	SRR866391	Limousin	PRJNA176557	100615196	5.5571	98.67%
	SRR8727725	Limousin	PRJNA526664	107472117	5.93582	90.66%
	SAMN01915358	Limousin	PRJNA176557	109356891	6.03992	98.82%
	SRR866389	Limousin	PRJNA176557	109356891	6.03992	98.82%
	SRR8727724	Limousin	PRJNA526664	110207074	6.08687	99.37%
	SRR8727726	Limousin	PRJNA526664	113751280	6.28263	99.01%
	SRR7946693	Limousin	PRJNA474946	117414760	6.48496	99.23%
	SRR8727723	Limousin	PRJNA526664	118386158	6.53862	99.40%
	SAMN09379815	Limousin	PRJNA474946	132821089	7.33587	98.98%
	SAMN09379817	Limousin	PRJNA474946	138158628	7.63067	98.77%
	SAMN09379818	Limousin	PRJNA474946	157429046	8.695	98.82%
	SAMN09379819	Limousin	PRJNA474946	158696061	8.76498	98.75%
	SAMN09379737	Limousin	PRJNA474946	163343228	9.02165	98.56%
	SAMN09379806	Limousin	PRJNA474946	168335924	9.2974	98.86%
	SAMN09379752	Limousin	PRJNA474946	181522682	10.0257	98.51%
	SAMN09379770	Limousin	PRJNA474946	185516529	10.2463	98.49%
	SAMN09379724	Limousin	PRJNA474946	185590466	10.2504	98.48%
	SAMN05216025	Limousin	PRJNA324822	186694493	10.3114	99.08%
	SAMN09379792	Limousin	PRJNA474946	190809557	10.5387	98.98%
	SAMN09379793	Limousin	PRJNA474946	192642938	10.6399	98.66%
	SAMN09379797	Limousin	PRJNA474946	193466299	10.6854	99.07%
	SAMN09379756	Limousin	PRJNA474946	194471451	10.7409	86.70%
	SAMN09379741	Limousin	PRJNA474946	199226812	11.0035	98.48%
	SAMN01915360	Limousin	PRJNA176557	200481765	11.0729	98.90%
	SAMN05216026	Limousin	PRJNA324822	203922204	11.2629	99.17%
	SAMN01920653	Limousin	PRJNA176557	204278952	11.2826	98.66%
	SAMN09379732	Limousin	PRJNA474946	205387517	11.3438	98.54%
	SAMN09379723	Limousin	PRJNA474946	212578089	11.741	98.58%
	SAMN09379757	Limousin	PRJNA474946	212595720	11.7419	98.62%
	SAMN09379776	Limousin	PRJNA474946	217654659	12.0213	97.56%
	SAMN09379773	Limousin	PRJNA474946	219669693	12.1326	85.22%
	SAMN09379709	Limousin	PRJNA474946	222651699	12.2973	98.76%
	SAMN09379766	Limousin	PRJNA474946	231267362	12.7732	98.70%
	SAMN09379722	Limousin	PRJNA474946	233812629	12.9138	98.59%
	SAMN09379710	Limousin	PRJNA474946	242245749	13.3795	98.60%
	SAMN09379774	Limousin	PRJNA474946	244403330	13.4987	98.36%
	SAMN05216024	Limousin	PRJNA324822	256716540	14.1788	99.18%
	SAMN09379695	Limousin	PRJNA474946	257108391	14.2004	98.56%
	SAMN05216023	Limousin	PRJNA324822	261675873	14.4527	99.23%
	SAMN09379726	Limousin	PRJNA474946	269351983	14.8766	98.57%
	SAMN09379820	Limousin	PRJNA474946	269418825	14.8803	99.12%
	SAMN09379784	Limousin	PRJNA474946	282565924	15.6065	98.57%
	SAMN05216022	Limousin	PRJNA324822	285024724	15.7423	99.18%
	SAMN09379748	Limousin	PRJNA474946	307523066	16.9849	98.69%
	SAMN09379791	Limousin	PRJNA474946	315138371	17.4055	93.41%
	SRR1365134	Limousin	PRJNA176557	315859633	17.4453	98.30%
	SRR1365136	Limousin	PRJNA176557	319911314	17.6691	98.41%
	SAMN05216021	Limousin	PRJNA324822	334629029	18.482	99.05%
	SAMN10940545	Limousin	PRJNA343262	583863190	32.2475	98.93%
	SAMN10940544	Limousin	PRJNA343262	611879471	33.7949	99.19%
	SAMN03387023	Limousin	PRJNA277147	876197490	48.3935	0.9891
	SRR5507221	LingnanCattle	PRJNA379859	140516254	7.76089	98.65%
	SRR5507216	LingnanCattle	PRJNA379859	179677203	9.9238	99.17%
	SRR5507220	LingnanCattle	PRJNA379859	181843349	10.0434	98.85%
	SRR5507219	LingnanCattle	PRJNA379859	184573944	10.1942	99.11%
	SRR5507239	LuxiCattle	PRJNA379859	154161158	8.51451	98.66%
	SRR5507240	LuxiCattle	PRJNA379859	162922832	8.99843	98.59%
	SRR5507241	LuxiCattle	PRJNA379859	184845477	10.2092	98.62%
	SRR5507238	LuxiCattle	PRJNA379859	186046329	10.2756	98.78%
	SRR1365127	MaineAnjou	PRJNA176557	418600080	23.1198	98.81%
	SRR1365130	MaineAnjou	PRJNA176557	430457946	23.7747	98.65%
	SRR5507264	MongolianCattle	PRJNA379859	210719582	11.6383	98.96%
	SRR5507263	MongolianCattle	PRJNA379859	212209140	11.7206	99.08%
	SRR5507262	MongolianCattle	PRJNA379859	214461477	11.845	99.13%
	SRR12452214	Mursi	PRJNA574857	198808211	10.9804	99.35%
	SRR12452215	Mursi	PRJNA574857	240609754	13.2892	99.30%
	SRR12452216	Mursi	PRJNA574857	241376733	13.3315	99.18%
	SRR12452221	Mursi	PRJNA574857	243521348	13.45	99.15%
	SRR12452218	Mursi	PRJNA574857	246171011	13.5963	99.30%
	SRR12452212	Mursi	PRJNA574857	263062037	14.5292	99.04%
	SRR12452213	Mursi	PRJNA574857	267755530	14.7885	99.10%
	SRR12452222	Mursi	PRJNA574857	291603378	16.1056	99.22%
	SRR12452219	Mursi	PRJNA574857	325215987	17.9621	98.97%
	SRR10992777	Muturu	PRJNA604048	143834662	7.94417	98.96%
	SRR10992776	Muturu	PRJNA604048	145093879	8.01372	99.36%
	SRR10992775	Muturu	PRJNA604048	161311969	8.90946	99.02%
	SRR10992774	Muturu	PRJNA604048	179821559	9.93177	99.46%
	Sample_Ndama188	Ndama		188618462	10.4176	99.04%
	SRR12452199	NDama	PRJNA574857	262433968	14.4946	99.18%
	SRR12452200	NDama	PRJNA574857	265241676	14.6496	99.30%
	SRR12452201	NDama	PRJNA574857	299937979	16.5659	99.32%
	SRR8249134	Nelore	PRJNA507259	98918599	5.4634	99.16%
	SAMN05788525	Nelore	PRJNA343262	132450578	7.31541	99.25%
	SAMN05788521	Nelore	PRJNA343262	141504449	7.81547	99.10%
	SRR2016757	Nelore	PRJNA277147	142006855	7.84322	99.11%
	SAMN05788523	Nelore	PRJNA343262	155469207	8.58676	99.01%
	SAMN05788520	Nelore	PRJNA343262	182858836	10.0995	99.24%
	SRR2016756	Nelore	PRJNA277147	184091652	10.1676	99.24%
	SAMN05788522	Nelore	PRJNA343262	191925452	10.6003	99.18%
	SRR2016759	Nelore	PRJNA277147	192977433	10.6584	99.18%
	SRR8249135	Nelore	PRJNA507259	196497804	10.8528	99.39%
	SRR8249136	Nelore	PRJNA507259	204467600	11.293	99.26%
	SAMN05788524	Nelore	PRJNA343262	276432412	15.2677	99.55%
	SRR2016762	Nelore	PRJNA277147	280582420	15.4969	99.55%
	SRR3592093	Ogaden	PRJNA312138	230071187	12.7071	98.94%
	SRR3219049	Ogaden	PRJNA312138	240000464	13.2555	99.21%
	SRR3592091	Ogaden	PRJNA312138	246102706	13.5926	99.11%
	SRR3508266	Ogaden	PRJNA312138	250459437	13.8332	99.22%
	SRR3490689	Ogaden	PRJNA312138	251076956	13.8673	99.24%
	SRR3491019	Ogaden	PRJNA312138	257176804	14.2042	99.19%
	SRR3592092	Ogaden	PRJNA312138	260026553	14.3616	98.93%
	SRR3225526	Ogaden	PRJNA312138	264737331	14.6218	99.24%
	SRR5137243	PolishHolstein-Friesian	PRJNA359667	154960106	8.55864	92.72%
	SRR5137237	PolishHolstein-Friesian	PRJNA359667	226961004	12.5353	97.85%
	SRR5137248	PolishHolstein-Friesian	PRJNA359667	244592035	13.5091	98.03%
	SRR5137227	PolishHolstein-Friesian	PRJNA359667	261342805	14.4343	98.06%
	SRR5137222	PolishHolstein-Friesian	PRJNA359667	268493089	14.8292	97.95%
	SRR5137235	PolishHolstein-Friesian	PRJNA359667	290209714	16.0286	98.43%
	SRR5137236	PolishHolstein-Friesian	PRJNA359667	290826189	16.0627	98.31%
	SRR5137226	PolishHolstein-Friesian	PRJNA359667	321397909	17.7512	98.12%
	SRR5137247	PolishHolstein-Friesian	PRJNA359667	333399166	18.4141	98.29%
	SRR5137239	PolishHolstein-Friesian	PRJNA359667	354878122	19.6004	98.92%
	SRR5137246	PolishHolstein-Friesian	PRJNA359667	356390813	19.6839	98.22%
	SRR5137234	PolishHolstein-Friesian	PRJNA359667	364469997	20.1301	98.74%
	SRR5137225	PolishHolstein-Friesian	PRJNA359667	365601309	20.1926	99.00%
	SRR5137228	PolishHolstein-Friesian	PRJNA359667	379194261	20.9434	99.04%
	SRR5137233	PolishHolstein-Friesian	PRJNA359667	382084184	21.103	98.87%
	SRR5137220	PolishHolstein-Friesian	PRJNA359667	382392770	21.12	98.94%
	SRR5137241	PolishHolstein-Friesian	PRJNA359667	383852118	21.2006	98.57%
	SRR5137242	PolishHolstein-Friesian	PRJNA359667	393012665	21.7066	97.64%
	ERR454993	Rashoki	PRJEB5462	319835115	17.6649	99.03%
	SRR1525600	RedAngus	PRJNA256210	172730290	9.54011	98.68%
	SRR8396975	RedAngus	PRJNA513064	182210355	10.0637	98.81%
	SRR8396976	RedAngus	PRJNA513064	208570889	11.5196	98.85%
	SRR1525580	RedAngus	PRJNA256210	239400891	13.2224	98.59%
	SRR1365113	RedAngus	PRJNA176557	373795801	20.6452	98.45%
	SRR1365103	RedAngus	PRJNA176557	412180905	22.7653	97.95%
	SRR8396977	RedAngus	PRJNA513064	495992155	27.3943	97.66%
	SRR1525608	Salers	PRJNA256210	176164478	9.72978	98.80%
	SRR12452194	Sheko	PRJNA574857	264100164	14.5866	99.32%
	SRR12452191	Sheko	PRJNA574857	272435992	15.047	99.30%
	SRR12452192	Sheko	PRJNA574857	279676242	15.4469	99.35%
	SRR12452190	Sheko	PRJNA574857	284457755	15.711	99.35%
	SRR12452189	Sheko	PRJNA574857	291264885	16.0869	99.26%
	SRR12452198	Sheko	PRJNA574857	292840090	16.1739	99.34%
	SRR12452197	Sheko	PRJNA574857	303669373	16.772	99.30%
	SRR12452196	Sheko	PRJNA574857	316051694	17.4559	99.37%
	SAMN09379809	Simmental	PRJNA474946	147642564	8.15448	98.47%
	SAMN09379832	Simmental	PRJNA474946	159790784	8.82544	98.49%
	SAMN09379706	Simmental	PRJNA474946	176357348	9.74044	98.39%
	SAMN09379828	Simmental	PRJNA474946	177472938	9.80205	98.39%
	SAMN09379698	Simmental	PRJNA474946	179772704	9.92907	98.50%
	SAMN09379778	Simmental	PRJNA474946	188668112	10.4204	76.76%
	SAMN09379786	Simmental	PRJNA474946	191951515	10.6017	85.93%
	SAMN09379772	Simmental	PRJNA474946	194904444	10.7648	85.24%
	SAMN09379696	Simmental	PRJNA474946	198017906	10.9368	98.59%
	SAMN09379767	Simmental	PRJNA474946	201715017	11.141	98.51%
	SAMN09379718	Simmental	PRJNA474946	207745428	11.474	98.51%
	SAMN09379831	Simmental	PRJNA474946	209607535	11.5769	98.47%
	SAMN09379807	Simmental	PRJNA474946	213029366	11.7659	96.92%
	SAMN09379768	Simmental	PRJNA474946	215598540	11.9078	98.63%
	SAMN09379731	Simmental	PRJNA474946	216934272	11.9816	98.72%
	SAMN09379717	Simmental	PRJNA474946	223922664	12.3675	98.50%
	SAMN09379782	Simmental	PRJNA474946	224591161	12.4045	89.49%
	SAMN09379825	Simmental	PRJNA474946	228460409	12.6182	97.79%
	SAMN09379823	Simmental	PRJNA474946	233717035	12.9085	95.40%
	SAMN05216032	Simmental	PRJNA324822	238409687	13.1677	99.23%
	SAMN09379777	Simmental	PRJNA474946	245331468	13.55	78.29%
	SAMN09379827	Simmental	PRJNA474946	247020471	13.6432	98.03%
	SAMN09379730	Simmental	PRJNA474946	255595740	14.1169	98.66%
	SAMN09379734	Simmental	PRJNA474946	257428667	14.2181	98.53%
	SRR1525710	Simmental	PRJNA256210	269321264	14.875	98.74%
	SAMN05216031	Simmental	PRJNA324822	269694780	14.8956	99.07%
	SRR1525719	Simmental	PRJNA256210	272110979	15.029	98.82%
	SAMN09379824	Simmental	PRJNA474946	272718716	15.0626	98.28%
	SAMN05216028	Simmental	PRJNA324822	280979547	15.5189	99.18%
	SRR1525718	Simmental	PRJNA256210	284634242	15.7207	98.65%
	SAMN05216029	Simmental	PRJNA324822	290504540	16.0449	99.13%
	SRR1525625	Simmental	PRJNA256210	294569306	16.2694	98.10%
	SRR1525711	Simmental	PRJNA256210	300467713	16.5952	98.57%
	SRR1525627	Simmental	PRJNA256210	300894084	16.6188	98.66%
	SAMN09379708	Simmental	PRJNA474946	304139511	16.798	98.54%
	SRR1525704	Simmental	PRJNA256210	306336530	16.9193	98.17%
	SRR1525713	Simmental	PRJNA256210	307725700	16.9961	98.21%
	SRR1525621	Simmental	PRJNA256210	309127735	17.0735	98.20%
	SRR1525712	Simmental	PRJNA256210	310652546	17.1577	98.56%
	SRR1525714	Simmental	PRJNA256210	311483555	17.2036	97.31%
	SRR1525624	Simmental	PRJNA256210	312550277	17.2625	98.95%
	SAMN05216030	Simmental	PRJNA324822	313117839	17.2939	99.21%
	SRR1525619	Simmental	PRJNA256210	313222839	17.2997	98.56%
	SRR1525707	Simmental	PRJNA256210	313605781	17.3208	98.39%
	SRR7976618	Simmental	PRJNA176557	313813399	17.3323	97.69%
	SRR1525623	Simmental	PRJNA256210	316840259	17.4995	98.54%
	SRR7976535	Simmental	PRJNA176557	318165341	17.5727	95.57%
	SRR1525618	Simmental	PRJNA256210	320268079	17.6888	98.25%
	SRR1525622	Simmental	PRJNA256210	320539809	17.7038	98.48%
	SRR1525626	Simmental	PRJNA256210	327091303	18.0657	98.16%
	SRR1525617	Simmental	PRJNA256210	328791752	18.1596	98.73%
	SRR1525700	Simmental	PRJNA256210	337334632	18.6314	98.54%
	SRR1525709	Simmental	PRJNA256210	337411263	18.6356	98.56%
	SRR1525717	Simmental	PRJNA256210	339325475	18.7414	97.50%
	SAMN09379822	Simmental	PRJNA474946	339643899	18.759	98.47%
	SRR1525701	Simmental	PRJNA256210	339868311	18.7714	98.13%
	SRR1525716	Simmental	PRJNA256210	342787790	18.9326	98.42%
	SRR1525706	Simmental	PRJNA256210	343369526	18.9647	98.57%
	SRR1525708	Simmental	PRJNA256210	344216684	19.0115	98.38%
	SRR7976539	Simmental	PRJNA176557	344807736	19.0442	97.64%
	SAMN09379785	Simmental	PRJNA474946	345269753	19.0697	87.70%
	SRR1525620	Simmental	PRJNA256210	345623651	19.0892	98.52%
	SAMN05216027	Simmental	PRJNA324822	348724596	19.2605	99.08%
	SRR1525715	Simmental	PRJNA256210	361096629	19.9438	98.43%
	SRR1525702	Simmental	PRJNA256210	365865789	20.2072	98.48%
	SRR1525705	Simmental	PRJNA256210	373855304	20.6485	98.17%
	SRR1525703	Simmental	PRJNA256210	423702414	23.4016	93.59%
	SAMN05788543	Simmental	PRJNA343262	456833142	25.2315	99.09%
	SRR10752677	Simmental	PRJNA343262	484404870	26.7543	98.65%
	SRR10752701	Simmental	PRJNA343262	486964035	26.8956	99.35%
	SRR10752700	Simmental	PRJNA343262	512110282	28.2845	99.16%
	SAMN10940558	Simmental	PRJNA343262	515159232	28.4529	95.34%
	SAMN10940562	Simmental	PRJNA343262	517285213	28.5703	98.95%
	SAMN10940559	Simmental	PRJNA343262	531369292	29.3482	95.08%
	SAMN05788545	Simmental	PRJNA343262	541081564	29.8846	95.62%
	SAMN05788546	Simmental	PRJNA343262	554262906	30.6126	96.95%
	SAMN10940561	Simmental	PRJNA343262	573770129	31.69	97.01%
	SAMN05788544	Simmental	PRJNA343262	580109519	32.0402	95.32%
	SAMN10940560	Simmental	PRJNA343262	585124942	32.3172	98.71%
	SAMN05788541	Simmental	PRJNA343262	607713598	33.5648	98.97%
	SAMN05788542	Simmental	PRJNA343262	619652952	34.2242	98.95%
	SRR5507246	TibetanYellowCattle	PRJNA379859	166735347	9.209	98.88%
	SRR5507250	TibetanYellowCattle	PRJNA379859	181450473	10.0217	98.69%
	SRR5507251	TibetanYellowCattle	PRJNA379859	184857205	10.2099	98.92%
	SRR5507245	TibetanYellowCattle	PRJNA379859	191791269	10.5929	98.98%
	SRR5507247	TibetanYellowCattle	PRJNA379859	197000419	10.8806	99.10%
	SRR5507244	TibetanYellowCattle	PRJNA379859	199238543	11.0042	99.08%
	SRR5507193	WandongCattle	PRJNA379859	141851956	7.83466	97.44%
	SRR5507194	WandongCattle	PRJNA379859	170602571	9.42259	99.05%
	SRR5507197	WannanCattle	PRJNA379859	177429695	9.79966	98.28%
	SRR6024573	WannanCattle	PRJNA379859	220644014	12.1864	95.56%
	SRR5507201	WeiningCattle	PRJNA379859	158489618	8.75358	98.81%
	SRR5507200	WeiningCattle	PRJNA379859	172245094	9.51331	98.38%
	SRR5507202	WeiningCattle	PRJNA379859	186229346	10.2857	98.70%
	SRR6024576	WenshanCattle	PRJNA379859	176720066	9.76047	98.67%
	SRR6024575	WenshanCattle	PRJNA379859	198759027	10.9777	98.47%
	SRR6024570	WenshanCattle	PRJNA379859	201242276	11.1149	98.10%
	SRR6024577	WenshanCattle	PRJNA379859	201431992	11.1253	98.30%
	SRR6024578	WenshanCattle	PRJNA379859	255295283	14.1003	98.47%
	SRR5507206	XuanhanCattle	PRJNA379859	173766070	9.59732	99.01%
	SRR5507208	XuanhanCattle	PRJNA379859	179619886	9.92063	98.95%
	SRR5507205	XuanhanCattle	PRJNA379859	196305696	10.8422	98.96%
	SRR5507209	XuanhanCattle	PRJNA379859	201221702	11.1137	98.93%
	SRR5507207	XuanhanCattle	PRJNA379859	208666808	11.5249	99.02%
	SRR5507273	YanbianCattle	PRJNA379859	179744717	9.92753	99.14%
	SRR5507213	ZaobeiCattle	PRJNA379859	170295241	9.40562	98.49%
	SRR5507212	ZaobeiCattle	PRJNA379859	191060698	10.5525	98.65%
	SRR5507210	ZaobeiCattle	PRJNA379859	192492185	10.6316	98.98%

## Sheet: Table S2
	Table S2 Statistics of the SV number detected by integrated software for 898 animals
		SV events	Unique SV number	SV region number	Total Length
	Deletion	3340168	1612379	148370	738667545
	Duplication	181109	90995	7467	892002019
	Inversion	113310	93584	9339	547661403

## Sheet: Table S3
	Table S3A Locations and overlapped genes in SV desert regions							Table S3B Locations and overlapped genes in SV cluster regions
	Chr	Start	End	Overlapped_gene	Overlapped_gene_number			Chr	Start	End	Overlapped_gene	Overlapped_gene_number
	chr1	4060001	4800000	TIAM1, KRTAP11-1, KRTAP7-1, KRTAP8-1	4			chr1	210001	720000	LOC618219, LOC112447010, LOC618212	3
	chr1	5820001	6370000	CLDN17, GRIK1	2			chr1	32230001	33730000	CADM2	1
	chr1	17270001	17840000		0			chr1	86180001	87960000	CCDC39, TTC14, PEX5L, USP13, NDUFB5, MRPL47, ACTL6A, GNB4, MFN1, ZNF639, KCNMB3, PIK3CA	12
	chr1	24620001	25360000	ROBO2	1			chr1	92560001	93320000	NAALADL2, LOC616200, NLGN1	3
	chr1	26140001	26900000	ROBO1	1			chr1	122740001	123810000		0
	chr1	28590001	29100000		0			chr1	130120001	130640000	FOXL2, PIK3CB, FAIM, CEP70, ESYT3	5
	chr1	34180001	34860000		0			chr1	140930001	142100000	BACE2, FAM3B, MX2, MX1, TMPRSS2, LOC783811, LOC782628, RIPK4, PRDM15	9
	chr1	40490001	41030000	LOC782966, EPHA6	2			chr1	147430001	149550000	SETD4, CBR1, LOC112441473, MGC127133, CBR3, DOPEY2, MORC3, CHAF1B, CLDN14, SIM2, HLCS, RIPPLY3, PIGP, TTC3, VPS26C	15
	chr1	48260001	48760000		0			chr1	155950001	156970000	KCNH8	1
	chr1	60270001	60930000	GAP43, LSAMP	2			chr2	2080001	3400000		0
	chr1	61220001	61890000		0			chr2	5770001	7110000	NEMP2, MFSD6, INPP1, HIBCH, C2H2orf88, MSTN, PMS1, ORMDL1, OSGEPL1, ANKAR, ASNSD1, SLC40A1, WDR75	13
	chr1	73110001	73770000	ATP13A3, GP5, LRRC15, CPN2, LOC101905099, HES1, OPA1	7			chr2	10060001	10810000	FSIP2	1
	chr1	73860001	74380000	ATP13A4, ATP13A5, HRASLS	3			chr2	13320001	14760000	NUP35, DUSP19, NCKAP1, FRZB, DNAJC10, PDE1A, PPP1R1C, SSFA2	8
	chr1	74700001	75420000	FGF12	1			chr2	16130001	17100000	CWC22, ZNF385B	2
	chr1	79180001	79810000	LPP, BCL6, RTP2, SST	4			chr2	31420001	33800000	COBLL1, GRB14, FIGN	3
	chr1	88980001	90110000	TBL1XR1	1			chr2	48700001	50340000		0
	chr1	98020001	98870000	MECOM, LOC107131228	2			chr2	51560001	54590000	LOC101904069, LOC613677, ZEB2, GTDC1, ARHGAP15, KYNU	6
	chr1	107210001	107980000	IFT80, C1H3orf80, LOC511229, IL12A, SCHIP1	5			chr2	57610001	59110000	LOC101906569, NXPH2, SPOPL	3
	chr1	110160001	111510000	VEPH1, PTX3, CCNL1, LEKR1, TIPARP, SSR3, KCNAB1	7			chr2	104330001	104860000	4-Mar, SMARCAL1, RPL37A, IGFBP2, IGFBP5, TNP1	6
	chr1	125230001	125920000	SLC9A9, CHST2	2			chr2	109850001	114100000	PAX3, SGPP2, FARSB, LOC538702, MOGAT1, ACSL3, KCNE4, SCG2, AP1S3, WDFY1, MRPL44, SERPINE2, FAM124B, CUL3, DOCK10, NYAP2	16
	chr1	127580001	128440000	ZBTB38, PXYLP1, SPSB4, SLC25A36, TRIM42, CLSTN2	6			chr3	25570001	26160000	TENT5C, MAN1A2, VTCN1, TRIM45, TTF2	5
	chr1	139600001	140240000	SH3BGR, B3GALT5, IGSF5, PCP4, DSCAM	5			chr3	26410001	28550000	CD2, IGSF3, CD58, ATP1A1, MAB21L3, SLC22A15, NHLH2, CASQ2, VANGL1, NGF, TSPAN2, TSHB, SYCP1	13
	chr1	157630001	158220000	LOC538060, ZBED9, GPX5, GPX6, LOC112448270, LOC527195, ZSCAN23, TXLNA	8			chr3	37520001	40670000	LOC539383, AMY2B, RNPC3, LOC533361, COL11A1	5
	chr2	11450001	11950000	ZNF804A, LOC614531	2			chr3	54190001	54870000	GBP4, LOC112445996, LOC112445995, LOC781710, GBP6, LOC100336669, LOC112445998, LOC507055, LOC511531, LOC785445, LOC100336443, LOC783604	12
	chr2	20040001	20560000		0			chr3	75080001	75610000	LRRC7	1
	chr2	25690001	26240000	ERICH2, SP5, MYO3B	3			chr3	87550001	89510000	OMA1, DAB1, C8B, C8A, FYB2, PRKAA2	6
	chr2	41710001	42350000	GALNT13	1			chr3	103440001	104440000	TMEM269, C3H1orf50, P3H1, CLDN19, YBX1, PPIH, CCDC30, PPCS, ZMYND12, RIMKLA, FOXJ3, GUCA2A, GUCA2B, HIVEP3	14
	chr2	42450001	42960000	RPRM	1			chr3	119010001	119630000	LOC112445898, LOC112445899, LOC613418, LOC782152, LOC782114, LOC789457, LOC112445900, LOC112445901, LOC782190, LOC618660, LOC782255, LOC615009, LOC530175, CSF2RA, LOC100336476, IL3RA, LOC107131293, P2RY8, LOC112445918, AKAP17A, LOC112445919, LOC112446047	22
	chr2	50650001	51160000		0			chr4	780001	2370000		0
	chr2	59120001	59660000	HNMT, THSD7B	2			chr4	8120001	12860000	CDK14, FZD1, MTERF1, AKAP9, CYP51A1, LRRD1, KRIT1, ANKIB1, TMBIM7, GATAD1, PEX1, RBM48, LOC524650, FAM133B, CDK6, SAMD9, HEPACAM2, VPS50, CALCR, TFPI2, GNGT1, GNG11, BET1, COL1A2, CASD1, SGCE, PEG10, PPP1R9A, PON1, PON3, PON2, ASB4, LOC613363	33
	chr2	59700001	60220000	THSD7B	1			chr4	32100001	33870000	TRA2A, CCDC126, DBF4, SLC25A40, LOC785370, LOC100296627, RUNDC3B, LOC101902435, ABCB1, ABCB4, CROT, LOC511386, TMEM243, DMTF1, KIAA1324L, GRM3	16
	chr2	64360001	65020000	NCKAP5, LYPD1, GPR39	3			chr4	85510001	86640000	CPED1, WNT16, FAM3C, PTPRZ1, AASS	5
	chr2	69830001	70690000	EN1	1			chr4	92850001	95380000	KCP, IRF5, TNPO3, TSPAN33, SMO, AHCYL2, STRIP2, SMKR1, NRF1, UBE2H, ZC3HC1, KLHDC10, TMEM209, SSMEM1, LOC101903427, CPA5, CPA1, CEP41, MEST, COPG2, MARK4, TSGA13, KLF14, MKLN1, PODXL	25
	chr2	72210001	72870000	GLI2	1			chr4	112770001	113290000	REPIN1, ZNF775, LOC112446454, GIMAP8, GIMAP7, LOC511617, GIMAP4, LOC512867, LOC768255, LOC101902675, GIMAP6, LOC615733	12
	chr2	73450001	75260000	LOC784679	1			chr4	115070001	116610000	ACTR3B, DPP6	2
	chr2	76360001	76910000	CNTNAP5	1			chr5	2720001	3470000		0
	chr2	78730001	79300000	GYPC, TEX51	2			chr5	28140001	29870000	SCN8A, SLC4A8, GALNT6, CELA1, BIN2, SMAGP, DAZAP2, POU6F1, TFCP2, CSRNP2, LETMD1, SLC11A2, LOC512464, LOC112441543, HIGD1C, METTL7A, TMPRSS12, ATF1, DIP2B, LOC619094, LARP4, FAM186A, LIMA1, CERS5, COX14, GPD1, SMARCD1, ASIC1, RACGAP1	29
	chr2	84380001	84930000	DNAH7, STK17B, HECW2	3			chr5	47210001	51640000	GRIP1, HELB, IRAK3, TMBIM4, LLPH, HMGA2, MSRB3, LEMD3, WIF1, TBC1D30, LOC101906182, GNS, RASSF3, TBK1, XPOT, C5H12orf56, C5H12orf66, SRGAP1, RXYLT1, AVPR1A, PPM1H, MON2, USP15, FAM19A2	24
	chr2	86690001	87270000		0			chr5	92050001	92850000		0
	chr2	87340001	88110000	SATB2	1			chr5	112680001	114800000	DESI1, XRCC6, SNU13, C5H22orf46, MEI1, LOC785386, CCDC134, SREBF2, SHISA8, TNFRSF13C, CENPM, LOC535121, 3-Sep, WBP2NL, NAGA, PHETA2, SMDT1, NDUFA6, LOC785804, MGC127055, CYP2D14, TCF20, NFAM1, SERHL2, RRP7A, POLDIP3, CYB5R3, A4GALT, ARFGAP3, PACSIN2, TTLL1, BIK, MCAT, TSPO, TTLL12, SCUBE1, MPPED1, EFCAB6, SULT4A1, PNPLA5, LOC786474, PNPLA3, SAMM50, PARVB	44
	chr2	91790001	92550000	CD28, CTLA4, ICOS	3			chr5	115810001	117780000	SMC1B, RIBC2, FBLN1, ATXN10, WNT7B, LOC101903200, PPARA, CDPF1, PKDREJ, LOC104972622, LOC101904413, TTC38, GTSE1, TRMU, CELSR1, GRAMD4, LOC112446784, CERK, TBC1D22A	19
	chr2	92810001	93420000	PARD3B	1			chr6	13300001	14310000	FAM241A	1
	chr2	99970001	101070000	ERBB4, IKZF2	2			chr6	27020001	27800000		0
	chr2	105160001	105900000		0			chr6	37490001	39090000	LCORL	1
	chr2	107500001	108390000	OBSL1, INHA, STK11IP, SLC4A3	4			chr6	58810001	61910000	UBE2K, PDS5A, N4BP2, RHOH, CHRNA9, RBM47, NSUN7, APBB2, UCHL1, LIMCH1, PHOX2B, TMEM33, SLC30A9, BEND4, SHISA3, ATP8A1, GRXCR1	17
	chr2	108910001	109820000	EPHA4	1			chr6	72920001	74160000		0
	chr2	132010001	132530000	CDA, FAM43B, MUL1, CAMK2N1, VWA5B1, UBXN10, PLA2G2C, PLA2G2F	8			chr6	81940001	83130000		0
	chr2	135150001	135810000	ARHGEF10L, RCC2, PADI6, PADI4, PADI3, PADI1, PADI2, SDHB, ATP13A2, MFAP2, CROCC, NECAP2, SPATA21, SZRD1, FBXO42, LOC112443502	16			chr6	106180001	107230000	HS3ST1, LOC101906339	2
	chr3	5040001	5560000		0			chr6	115970001	117610000	LOC104968954, TNIP2, FAM193A, RNF4, CFAP99, ZFYVE28, MXD4, HAUS3, POLN, NAT8L, C6H4orf48, NELFA, NSD2, LETM1, FGFR3, LOC112447024, TACC3, TMEM129, SLBP, FAM53A, LOC104972780, NKX1-1, UVSSA, MAEA, LOC100848325, CTBP1, SPON2, RNF212, FGFRL1, IDUA, SLC26A1, DGKQ, TMEM175, GAK, CPLX1, PCGF3, LOC101906985	37
	chr3	9560001	10180000	IGSF8, KCNJ9, KCNJ10, PIGM, SLAMF9, IGSF9, TAGLN2, CFAP45, VSIG8, SLAMF8, FCRL6, DUSP23, CRP, APCS, OR10J5	15			chr7	1590001	2940000	MAML1, CANX, CBY3, HNRNPH1, RUFY1, ADAMTS2, ZNF354C, ZNF879, GRM6, ZFP2, RNF187, HIST3H2BB, HIST3H2A, LOC518318, TRIM17, TRIM11, OBSCN	17
	chr3	24690001	25570000	SPAG17, WDR3, GDAP2	3			chr7	8210001	10090000	OR7C2, LOC107131149, OR7A5, LOC510712, LOC112447429, LOC507726, LOC782513, LOC100299465, LOC107131150, LOC509641, LOC104972795, LOC504888, LOC787574, LOC100847239, LOC100847281, LOC616964, LOC787665, LOC533983, LOC618007, LOC509410, LOC787882, LOC112447485, LOC783492, LOC512948, LOC100298119, LOC507378, LOC510625, LOC541022, LOC785624, LOC107131239, LOC104968437, LOC789554, LOC789504, LOC10084730…	40
	chr3	30830001	31840000	ST7L, CTTNBP2NL, KCND3, DDX20, FAM212B, RAP1A, TMIGD3, ADORA3, C3H1orf162	9			chr7	25680001	27820000	FBN2, SLC12A2, CCDC192, CTXN3, PRRC1, MEGF10, C7H5orf63, 3-Mar, LMNB1, TEX43, PHAX, ALDH7A1, GRAMD2B	13
	chr3	32640001	33370000	KCNA3, KCNA2, KCNA10, CYM, PROK1, LAMTOR5, SLC16A4, RBM15, KCNC4, SLC6A17, UBL4B, ALX3	12			chr7	29520001	30030000	LOC107132619	1
	chr3	35420001	36280000	VAV3, NTNG1	2			chr7	36510001	37920000	SEMA6A, COMMD10, ARL10, NOP16, HIGD2A, CLTB, FAF2	7
	chr3	49350001	49890000	ABCA4, GCLM, DNTTIP2, BCAR3	4			chr7	78230001	80750000	LOC112447478, LOC101905951, TENM2, WWC1, RARS, FBLL1, ZFYVE16, FAM151B, ANKRD34B, DHFR, MSH3	11
	chr3	57870001	58800000	COL24A1, ZNHIT6, CYR61, DDAH1	4			chr7	91080001	92490000		0
	chr3	61050001	61660000		0			chr8	20060001	21500000	ELAVL2	1
	chr3	67570001	68400000	ST6GALNAC5, ST6GALNAC3	2			chr8	37890001	39730000	KDM4C, GLDC, UHRF2, TPD52L3, IL33, RANBP6, KIAA2026, MLANA, ERMP1, RIC1, PDCD1LG2, CD274, PLGRKT, INSL6, JAK2, RCL1	16
	chr3	68460001	69820000	ST6GALNAC3, ASB17, MSH4, RABGGTB, ACADM, SLC44A5, LHX8	7			chr8	95240001	97880000	SLC44A1, FSD1L, FKTN, TAL2, TMEM38B, ZNF462, RAD23B, LOC104969469, KLF4	9
	chr3	73200001	73740000	NEGR1	1			chr8	99400001	99990000	PALM2, AKAP2, C8H9orf152, TXN, TXNDC8, SVEP1	6
	chr3	92450001	93000000	NDC1, GLIS1, DMRTB1, LOC616319, LRP8	5			chr9	8490001	9130000	LMBRD1, COL19A1	2
	chr3	98090001	98880000	SKINT1, TRABD2B, FOXD2, FOXE3	4			chr9	20420001	21260000		0
	chr3	101180001	101700000	PTCH2, BTBD19, TCTEX1D4, PLK3, BEST4, RPS8, KIF2C, ARMH1, TMEM53, RNF220	10			chr9	54370001	58690000	MANEA, LOC782527, EPHA7	3
	chr3	107260001	107940000	POU3F1	1			chr9	84710001	87540000	LOC100850276, SAMD5, SASH1, UST, TAB2, ZC3H12D, PPIL4, GINM1, KATNA1, LATS1, NUP43, PCMT1, LRP11, ULBP21, RAET1L, LOC101903261, LOC785982, ULBP17, LOC100336795, RAET1G, IYD, PPP1R14C, LOC100848331	23
	chr3	108760001	109480000	GRIK3, MRPS15, OSCP1	3			chr9	92960001	94830000	ARID1B, LOC101902301, TMEM242, LDHAL6B, ZDHHC14, SNX9, SYNJ2, SERAC1, GTF2H5, TULP4	10
	chr3	118310001	118870000	HDAC4, LOC112445916	2			chr10	23300001	24880000	LOC100336282, LOC100295645	2
	chr3	119680001	120330000	LOC104970266, GPC1, ANKMY1, DUSP28, RNPEPL1, CAPN10, GPR35, AQP12B, KIF1A, AGXT, C3H2orf54, CROCC2, LOC107132365, SNED1, MTERF4	15			chr10	50900001	51410000	MYO1E, CCNB2, RNF111, SLTM	4
	chr4	7190001	7790000	ABCA13, LOC107132374, UPP1, C4H7orf57, SUN3, CLDN12	6			chr10	74280001	74810000		0
	chr4	21680001	22250000	ETV1	1			chr10	96600001	99140000	FLRT2	1
	chr4	27300001	28060000	HDAC9, LOC112446361, TWIST1, FERD3L	4			chr11	820001	2140000	BCL2L11, ACOXL, BUB1, TPC3, NPHP1, LOC107133459, MALL, MAL, LOC617833, MRPS5, ZNF514, ZNF2, PROM2, KCNIP3	14
	chr4	29320001	29990000	ABCB5, SP8	2			chr11	4930001	5570000	AFF3, LONRF2, CHST10, NMS	4
	chr4	35180001	35800000	SEMA3D	1			chr11	28010001	31470000	SRBD1, PRKCE, EPAS1, TMEM247, ATP6V1E2, RHOQ, PIGF, CRIPT, SOCS5, MCFD2, TTC7A, STPG4, CALM2, EPCAM, MSH2, KCNK12, LOC107132921, MSH6, FBXO11, FOXN2, PPP1R21, STON1, GTF2A1L, LHCGR, FSHR	25
	chr4	36440001	37190000	SEMA3A, SEMA3E	2			chr11	40310001	40960000	VRK2, FANCL	2
	chr4	37230001	37790000	SEMA3E, PCLO	2			chr11	49180001	50490000	LOC100300483, LOC104968634, LOC112448791, LOC616323, SFTPB, USP39, C11H2orf68, TMEM150A, RNF181, VAMP5, VAMP8, GGCX, MAT2A, SH2D6, CAPG, ELMOD3, RETSAT, TGOLN2, TCF7L1, LOC101907084, KCMF1, TMSB10, DNAH6	23
	chr4	41850001	42380000	MAGI2	1			chr11	60540001	61620000	COMMD1, B3GNT2, TMEM17, EHBP1, OTX1	5
	chr4	42420001	43030000	MAGI2	1			chr11	75160001	76840000	ATAD2B, KLHL29, LOC112448894	3
	chr4	44590001	45170000	SLC26A5, RELN	2			chr11	83480001	85490000	FAM84A, LOC782101, TRIB2	3
	chr4	45280001	46190000	ORC5, LHFPL3	2			chr11	89580001	91390000	RNF144A, RSAD2, CMPK2, SOX11	4
	chr4	54850001	55480000	GPR85, BMT2	2			chr11	96740001	99010000	PBX3, MVB12B, LMX1B, ZBTB43, ZBTB34, RALGPS1, ANGPTL2, GARNL3, SLC2A8, RPL12, LRSAM1, FAM129B, STXBP1, LOC100847700, CFAP157, PTRH1, TTC16, TOR2A, SH2D3C, CDK9, FPGS, ENG, AK1, ST6GALNAC6, ST6GALNAC4, PIP5KL1, DPM2, FAM102A, NAIF1, SLC25A25, PTGES2, LCN2, C11H9orf16, CIZ1, DNM1, GOLGA2, SWI5, TRUB2, COQ4, SLC27A4, URM1, CERCAM	42
	chr4	62570001	63290000	BMPER, BBS9	2			chr12	1980001	2560000	DIAPH3	1
	chr4	65200001	65700000	ADCYAP1R1, GHRHR, AQP1, MINDY4, INMT, CRHR2	6			chr12	2630001	3180000	DIAPH3	1
	chr4	66510001	67840000	PRR15, CHN2, CPVL, TRIL, CREB5	5			chr12	8500001	9270000	LOC101905933, LOC100141168	2
	chr4	68590001	69120000	EVX1, LOC112446393, HOXA13, HOXA11, HOXA10, HOXA9, HOXA7, HOXA6, HOXA5, HOXA3, HOXA4, HOXA2, HOXA1	13			chr12	16250001	17240000	LCP1, LRRC63, RUBCNL, LRCH1, ESD, HTR2A	6
	chr4	79900001	80540000	SUGCT	1			chr12	42650001	43360000		0
	chr4	81480001	82000000	POU6F2, VPS41	2			chr13	11000001	12800000	LOC615768, LOC112449366, LOC112449356, LOC112449367, LOC112441530, LOC112449357, LOC100337293, CCDC3, CAMK1D, CDC123, NUDT5, SEC61A2, DHTKD1, UPF2, PROSER2, ECHDC3, USP6NL	17
	chr4	83440001	83940000		0			chr13	79070001	79870000	NFATC2, ATP9A, SALL4, ZFP64	4
	chr4	84140001	85150000	LOC112446347, KCND2	2			chr13	81090001	81840000	ZNF217, BCAS1, CYP24A1, PFDN4	4
	chr4	99870001	100410000		0			chr14	23650001	25130000	IMPAD1, FAM110B, LOC101902490, UBXN2B, CYP7A1, SDCBP, NSMAF, TOX	8
	chr4	101030001	101890000	DGKI, CREB3L2, AKR1D1	3			chr14	50690001	52080000	CSMD3, LOC112449555, LOC101905320, LOC112449525	4
	chr4	109770001	110440000	CNTNAP2	1			chr14	54280001	55540000	KCNV1, SYBU, LOC107133125, EBAG9, PKHD1L1, ENY2, NUDCD1, TRHR	8
	chr4	116610001	117370000	DPP6, PAXIP1, HTR5A, INSIG1, EN2, CNPY1, RBM33	7			chr14	61750001	62620000	KLF10, ODF1, UBR5, RRM2B, NCALD	5
	chr5	7860001	8450000	LOC101907549, SYT1	2			chr14	72050001	73090000	RUNX1T1, SLC26A7	2
	chr5	29890001	30540000	AQP6, AQP5, AQP2, FAIM2, BCDIN3D, NCKAP5L, TMBIM6, FMNL3, PRPF40B, FAM186B, MCRS1, KCNH3, SPATS2, DNAJC22, C1QL4, TROAP, PRPH	17			chr14	76430001	78780000	ATP6V0D2, PSKH2, LOC100196897, CA2, CA3, CA1, LOC784254, LOC100847874, CA13, C14H8orf59, E2F5, LRRCC1, LOC518422, LOC506670, RALYL	15
	chr5	39810001	40360000	CNTN1, MUC19	2			chr14	79310001	80300000		0
	chr5	51660001	52200000	FAM19A2	1			chr15	15820001	19110000	PIWIL4, FUT4, C15H11orf97, CWF19L2, GUCY1A2, LOC112441599, ALKBH8, ELMOD1, SLN, SLC35F2, RAB39A, CUL5, ACAT1, NPAT, ATM, C15H11orf65, KDELC2, DDX10	18
	chr5	54200001	54710000	LRIG3	1			chr15	58960001	59700000	METTL15	1
	chr5	61160001	61660000		0			chr15	59840001	61090000	KCNA4, LOC787432, FSHB, ARL14EP	4
	chr5	66180001	66790000	IGF1, PAH, ASCL1	3			chr15	80710001	81600000	RTN4RL2, SLC43A1, TIMM10, SMTNL1, UBE2L6, SERPING1, YPEL4, CLP1, LOC112441555, ZDHHC5, MED19, TMX2, SELENOH, LOC101905538, CTNND1, LOC101905743, LOC524304, LOC615808, OR9Q2, LOC107133203, LOC104974344, LOC531571, LOC518442, OR5B2, LOC104968576, LOC615941, LOC509369, LOC104968563	28
	chr5	68020001	68630000	CHST11, SLC41A2, C5H12orf45, ALDH1L2	4			chr16	5700001	6240000	LOC100336868, LOC514121, LOC112441814, LOC112441815, LOC101905630, LOC790886, LOC781004, CFH	8
	chr5	68900001	69470000	C5H12orf75	1			chr16	13410001	14430000		0
	chr5	72420001	73510000	ISX, HMGXB4	2			chr16	31600001	32990000	KIF26B, EFCAB2, HNRNPU, COX20, DESI2, CATSPERE, ADSS, C16H1orf100	8
	chr5	80290001	81170000	FAR2	1			chr16	45710001	46670000	CAMTA1	1
	chr5	85610001	86330000	SOX5	1			chr16	66720001	67440000	HMCN1, PRG4, TPR	3
	chr5	90560001	91080000	PLEKHA5, LOC112446825	2			chr17	4390001	5800000	TRIM2, FHDC1, ARFIP1, TIGD4, TMEM154, FBXW7	6
	chr5	94700001	95270000	RERG, PDE6H, ARHGDIB, ERP27, MGP, ART4, SMCO3, C5H12orf60, WBP11, H2AFJ, LOC530773, GUCY2C	12			chr17	20910001	23900000	LOC618377	1
	chr5	96660001	97160000	GSG1, FAM234B, HEBP1, GPRC5D, GPRC5A, DDX47, APOLD1, CDKN1B, GPR19	9			chr17	24620001	25120000	LOC112442019, PCDH10	2
	chr5	104690001	105470000	ANO2, NTF3, KCNA5, KCNA1, KCNA6, GALNT8	6			chr17	41090001	42790000	GRIA2, GLRB, PDGFC	3
	chr5	110810001	111440000	TAB1, MGAT3, MIEF1, ATF4, RPS19BP1, LOC112446630, LOC112441544, CACNA1I, ENTHD1, GRAP2, FAM83F, TNRC6B	12			chr17	61350001	62380000	OAS2, OAS1Y, OAS1X, OAS1Z, RPH3A, PTPN11, RPL6, HECTD4, TRAFD1, NAA25, ERP29, TMEM116, LOC112442047, ADAM1A, LOC112442048, LOC112442049, MAPKAPK5, ALDH2	18
	chr6	1230001	1750000		0			chr18	1320001	2110000	VSTM2B, VAC14, LOC112442247, MTSS1L, IL34, SF3B3, COG4, FUK, ST3GAL2, DDX19A, AARS, DDX19B, EXOSC6, CLEC18C, PDPR, GLG1, RFWD3	17
	chr6	14340001	14910000	PITX2, LOC101906682	2			chr18	2790001	3850000	BCNT2, TMEM170A, CHST6, TMEM231, GABARAPL2, ADAT1, KARS, TERF2IP, CNTNAP4	9
	chr6	16800001	17500000	LEF1, HADH, CYP2U1, SGMS2, PAPSS1	5			chr18	58810001	59740000	LOC100847180, LOC100336734, LOC515089, LOC787858, LOC112442408, LOC100335467, LOC787812, LOC100139996, LOC100335553, LOC101902926, LOC101907570, LOC100299712, LOC100848077, LOC508131, LOC101903454, LOC100300095, LOC112442409	17
	chr6	20540001	21310000	CXXC4	1			chr19	5450001	6490000	HLF, MMD, TMEM100, LOC513767, LOC781298, PCTP, LOC616574, LOC528282	8
	chr6	28620001	29380000	PDHA2, UNC5C, BMPR1B	3			chr19	33910001	35590000	SLC47A2, ALDH3A2, SLC47A1, RNF112, MFAP4, MAPK7, LOC112442748, B9D1, EPN2, GRAP, SLC5A10, FAM83G, PRPSAP2, SHMT1, SMCR8, TOP3A, MIEF2, FLII, LLGL1, ALKBH5, MYO15A, DRG2, GID4, ATPAF2, DRC3, TOM1L2, SREBF1, RAI1, LOC104975050, PEMT, RASD1, MED9, NT5M, COPS3, FLCN, PLD6, MPRIP, TNFRSF13B, USP22, DHRS7B, TMEM11, NATD1, MAP2K3, KCNJ12, UTP18, MBTD1, NME2	47
	chr6	29430001	30060000	BMPR1B, PDLIM5	2			chr19	61970001	63280000	RGS9, AXIN2, CEP112, APOH, PRKCA, CACNG5, CACNG4, CACNG1, HELZ	9
	chr6	43430001	44130000	PPARGC1A	1			chr20	51840001	52370000		0
	chr6	55990001	56500000	LOC525433	1			chr21	17280001	17990000	AGBL1	1
	chr6	65220001	66030000	COX7B2, GABRA4, GABRB1	3			chr21	19670001	20260000	LOC522763, LOC107131588, LOC512440, LOC618633, LOC781494, LOC101905669, LOC529925, LOC101906218, LOC522540, LOC782682, LOC107131597, LOC520626, LOC508153, LOC526149, LOC526148, LOC100298625, LOC100298937, LOC100299845, LOC512617, LOC531169, LOC523057, LOC515149, LOC100298453, LOC100335635, LOC512149	25
	chr6	83390001	84090000	UBA6, GNRHR, LOC100140490, TMPRSS11D, TMPRSS11A, LOC518437, TMPRSS11F, TMPRSS11BNL, LOC100140029, TMPRSS11E	10			chr21	25090001	27280000	MORF4L1, CTSH, RASGRF1, ANKRD34C, TMED3, KIAA1024, MTHFS, BCL2A1, ZFAND6, FAH, CTXND1, ARNT2, ABHD17C, CEMIP, MESD, TLNRD1, CFAP161, IL16, STARD5, TMC3	20
	chr6	87300001	87810000	NPFFR2, ADAMTS3	2			chr21	38080001	39000000		0
	chr6	88280001	88940000	ANKRD17, ALB, AFP, AFM, LOC100140503, RASSF6, CXCL8, LOC534181, CXCL5, PPBP, PF4	11			chr21	54060001	56510000	FSCB, C21H14orf28, KLHL28, TOGARAM1, PRPF39, FKBP3, FANCM, MIS18BP1, TGM5, TGM7, LCMT2, ADAL, ZSCAN29, TUBGCP4, TP53BP1, MAP1A, PPIP5K1, CKMT1A, STRC, CATSPER2, PDIA3, ELL3, SERF2, SERINC4, HYPK, MFAP1, WDR76, FRMD5, GPR68, CCDC88C, PPP4R3A, LOC505600, CATSPERB, TC2N	34
	chr6	91230001	91770000	CCDC158, SHROOM3, SOWAHB, 11-Sep	4			chr22	4160001	7620000	RBMS3, TGFBR2, GADL1, STT3B, OSBPL10, GPD1L, CMTM8, CMTM7, CMTM6, DYNC1LI1, CNOT10, TRIM71, CCR4, GLB1, TMPPE, CRTAP, SUSD5, FBXL2	18
	chr6	92760001	93320000	FRAS1, ANXA3	2			chr22	11180001	12810000	ITGA9, CTDSPL, VILL, PLCD1, DLEC1, ACAA1, MYD88, OXSR1, SLC22A13, SLC22A14, XYLB, ACVR2B, EXOG, SCN5A, SCN10A, SCN11A, WDR48, GORASP1, TTC21A, CSRNP1, XIRP1, CX3CR1, CCR8, LOC615277, SLC25A38, LOC515736, RPSA, MOBP	28
	chr6	99910001	100420000	ARHGAP24	1			chr23	2080001	2960000	PRIM2	1
	chr6	104020001	104580000	STK32B, CYTL1, MSX1, LOC112447021	4			chr23	9650001	10430000	FKBP5, ARMC12, CLPSL2, CLPS, LOC107131713, LHFPL5, SRPK1, SLC26A8, MAPK14, MAPK13, BRPF3, PNPLA1, C23H6orf222, PXT1, KCTD20, STK38	16
	chr7	17510001	18010000	LOC518134, LOC508459, VAV1, SH2D3A, TRIP10, GPR108, C3, TNFSF14, CD70, TNFSF9, LOC101905992, TUBB4A, DENND1C, CRB3, SLC25A23	15			chr23	17750001	22150000	HSP90AB1, SLC35B2, NFKBIE, TMEM151B, TCTE1, AARS2, SPATS1, CDC5L, CCNI2, SUPT3H, RUNX2, CLIC5, ENPP4, ENPP5, RCAN2, CYP39A1, SLC25A27, TDRD6, PLA2G7, ANKRD66, MEP1A, ADGRF5, ADGRF1, LOC100296156, TNFRSF21, CD2AP, ADGRF2, ADGRF4, OPN5, LOC107131722, PTCHD4, OR9G1, OR5M10, LOC100138976, LOC613394, LOC781635	36
	chr7	28890001	29520000	ZNF608	1			chr23	37600001	39110000	MBOAT1, ID4	2
	chr7	32940001	33480000	PRR16	1			chr24	3400001	4220000	TSHZ1, ZADH2, ZNF407, LOC112444151, CNDP1, CNDP2, FAM69C, C24H18orf63, CYB5A	9
	chr7	53230001	54340000	LOC100847454, SPRY4, FGF1, ARHGAP26	4			chr24	8930001	12740000	DSEL, CDH19, CDH7, SERPINB8, LOC281376, LOC100848171, SYT4	7
	chr7	54490001	55440000	NR3C1, YIPF5, KCTD16	3			chr24	20860001	22340000	MOCOS, ELP2, SLC39A6, RPRD1A, C24H18orf21, GALNT1, INO80C, ZNF24, ZNF397, ZSCAN30, MAPRE2, DTNA	12
	chr7	58650001	59780000	DPYSL3, JAKMIP2, SPINK1, SCGB3A2, C7H5orf46, SPINK5, LOC100296105, LOC112447524, SPINK6, LOC112447447, LOC101903018, LOC112447448, LOC100295995, LOC104972858, LOC112447449, LOC777593, SPINK13, SPINK7, SPINK9	19			chr24	27270001	28790000	CDH2	1
	chr7	64620001	65280000	GRIA1	1			chr24	56700001	57240000	ONECUT2, FECH, NARS, ATP8B1, NEDD4L	5
	chr7	70880001	71420000	IL12B	1			chr25	3990001	5540000	PPL, SEC14L5, NAGPA, C25H16orf89, ALG1, EEF2KMT, LOC521021, RBFOX1	8
	chr7	72590001	73140000	GABRB2	1			chr25	6930001	8230000	TMEM114, METTL22, ABAT, TMEM186, PMM2, CARHSP1, LOC101906055, USP7, C25H16orf72	9
	chr7	75240001	76220000		0			chr25	23000001	24010000	HS3ST4	1
	chr7	77020001	77530000		0			chr25	38810001	40450000	FBXL18, TNRC18, SLC29A4, WIPI2, MMD2, RADIL, PAPOLB, AP5Z1, FOXK1, SDK1, LOC107131851, CARD11	12
	chr7	83550001	84350000	HAPLN1, EDIL3	2			chr26	14590001	16190000	MYOF, CEP55, FFAR4, RBP4, PDE6C, FRA10AC1, LOC112444479, ASMTL, SLC25A6, LOC112444532, LGI1, SLC35G1, PLCE1, NOC3L, TBC1D12, HELLS, CYP2C18, CYP2C87	18
	chr7	84700001	85300000		0			chr27	6230001	7230000	LAP, LOC783012, DEFB13, LOC100296035, LOC101907227, LOC107131528, LOC112444640, DEFB10, LOC101902646, DEFB7, DEFB1, DEFB, DEFB4A, EBD	14
	chr7	88350001	89390000	MEF2C, LOC112447530	2			chr27	19400001	20180000	FGL1, MTUS1, PDGFRL, SLC7A2, MTMR7, VPS37A, CNOT7, ZDHHC2, MICU3	9
	chr7	94160001	94750000	MCTP1, FAM81B	2			chr27	40100001	41180000	TOP2B, RARB	2
	chr7	110050001	110620000	TSLP, WDR36, CAMK4, ARHGEF12	4			chr28	590001	3290000	RHOU, RAB4A, SPHAR, CCSAP, ACTA1, NUP133, ABCB10, TAF5L, URB2, GALNT2, PGBD5, LOC100337323, LOC614741	13
	chr8	18910001	19530000		0			chr28	3850001	5250000	TRIM67, C28H1orf131, GNPAT, EXOC8, SPRTN, EGLN1, LOC533307, TSNAX, DISC1, SIPA1L2	10
	chr8	21540001	22040000	DMRTA1	1			chr28	8110001	9890000	TBCE, B3GALNT2, GNG4, LYST, NID1, GPR137B, ERO1B, LOC107131919, EDARADD, LGALS8, HEATR1, ACTN2, MTR, RYR2	14
	chr8	25180001	25960000	HAUS6, RRAGA, SAXO1, ADAMTSL1	4			chr28	14280001	16430000	BICC1, PHYHIPL, FAM13C, SLC16A9, MRLN, CCDC6, ANK3	7
	chr8	26140001	26950000	ADAMTSL1, SH3GL2, CNTLN	3			chr29	1410001	2000000	DEUP1, SLC36A4, MTNR1B, FAT3	4
	chr8	27580001	28400000	BNC2, LOC616199	2			chr29	2610001	5170000	FAT3, LOC112444871, CHORDC1, NAALAD2	4
	chr8	29170001	29990000	FREM1, CER1, ZDHHC21, LOC101903205, NFIB	5			chr29	37790001	39390000	PAG5, LOC504812, PAG18, PAG7, PAG15, PAG4, PAG14, PAG16, PAG20, PAG21, PAG1, LOC784867, PAG19, MGC157408, LOC614287, PAG17, LOC616004, MGC157405, LOC520130, PAG9, PAG3, PAG6	22
	chr8	30160001	31060000	MPDZ	1
	chr8	31760001	32490000		0
	chr8	34590001	35090000		0
	chr8	39910001	40440000	SPATA6L, SLC1A1, GLIS3	3
	chr8	42950001	43460000		0
	chr8	48010001	48640000	ABHD17B, C8H9orf85, LOC104969352, C8H9orf57, GDA, ZFAND5	6
	chr8	56970001	57530000		0
	chr8	64180001	64940000	TGFBR1, ALG2, SEC61B, LOC539818, NR4A3	5
	chr8	68620001	69140000	GFRA2, LOC104969383	2
	chr8	71000001	71500000	LOC539009, ADAMDEC1	2
	chr8	71540001	72240000	ADAMDEC1, ADAM7, NEFM, NEFL	4
	chr8	74150001	74800000	STMN4, TRIM35, PTK2B, CHRNA2, EPHX2, GULO, HTD2, LOC781261, APTX, DNAJA1	10
	chr8	77390001	78420000	SLC28A3, NTRK2	2
	chr8	80260001	80820000	DAPK1	1
	chr8	102660001	103460000	C8H9orf43, RGS3, ZNF618, AMBP, KIF12, COL27A1	6
	chr8	106100001	106660000	ASTN2	1
	chr9	11160001	12020000	RIMS1, KCNQ5	2
	chr9	21260001	21920000	FAM46A	1
	chr9	27810001	28340000	LOC112448021, LOC112448154, LOC101904186, LOC100848869, CLVS2	5
	chr9	36910001	37710000		0
	chr9	46580001	47310000		0
	chr9	50890001	51550000	POU3F2	1
	chr9	51600001	52170000		0
	chr9	63950001	65180000	NT5E, TBX18, CEP162	3
	chr9	65710001	66330000	THEMIS, PTPRK	2
	chr9	68390001	68930000	TMEM200A, SMLR1	2
	chr9	74980001	75740000	IL20RA, IL22RA2, IFNGR1, OLIG3	4
	chr9	87660001	88370000	PLEKHG1, MTHFD1L, AKAP12	3
	chr9	89370001	89870000	SYNE1, MYCT1, VIP	3
	chr9	104440001	105450000		0
	chr10	12660001	13180000	DENND4A, RAB11A, MEGF11	3
	chr10	15660001	16390000	SPESP1, NOX5, GLCE, PAQR5, KIF23, RPLP1	6
	chr10	16470001	17510000	TLE3	1
	chr10	30430001	31010000	AQR, ZNF770, DPH6	3
	chr10	33350001	33930000	TMCO5A, SPRED1	2
	chr10	34640001	35350000	THBS1, FSIP1	2
	chr10	43780001	44470000	PYGL, LOC107132849, TRIM9, TMX1, FRMD6	5
	chr10	51940001	52560000	AQP9, ALDH1A2	2
	chr10	58510001	59110000	TMOD3, TMOD2, LYSMD2, SCG3, DMXL2, GLDN, CYP19A1	7
	chr10	61970001	62470000	DUT, SLC12A1, CTXN2, MYEF2, SLC24A5	5
	chr10	63650001	64770000		0
	chr10	69100001	69620000	OTX2, EXOC5	2
	chr10	69690001	70270000	AP5M1, NAA30, CCDC198, SLC35F4	4
	chr10	74890001	75640000	KCNH5, RHOJ, GPHB5, PPP2R5E	4
	chr10	77850001	78450000		0
	chr10	82710001	83290000	SIPA1L1	1
	chr10	83430001	84170000	RGS6, DPF3	2
	chr10	89630001	90370000	NRXN3	1
	chr11	5600001	6170000	LOC112448743, NPAS2, LOC107132896, RPL31, TBC1D8, CNOT11	6
	chr11	7680001	8800000		0
	chr11	22350001	23310000	SLC8A1	1
	chr11	23910001	24580000	PKDCC, EML4	2
	chr11	25050001	25700000	MTA3, HAAO, ZFP36L2, THADA	4
	chr11	27060001	27770000	CAMKMT, LOC107132919, SIX3, SIX2	4
	chr11	42510001	43050000		0
	chr11	44930001	45740000	SLC5A7, ST6GAL2, UXS1	3
	chr11	46580001	47110000	IL37, IL36G, IL36A, IL36B, IL36RN, IL1F10, IL1RN, PSD4, PAX8	9
	chr11	54550001	55120000	CTNNA2	1
	chr11	63620001	64260000	ACTR2, SPRED2	2
	chr11	64960001	65460000		0
	chr11	77080001	78400000	TDRD15, APOB, LDAH, GDF7, HS1BP3, RHOB	6
	chr11	78830001	80280000	MATN3, WDR35, TTC32, OSR1, NT5C1B, RDH14	6
	chr11	81980001	82670000	MYCN, MYCNOS	2
	chr12	13240001	14060000	ENOX1, CCDC122	2
	chr12	14390001	15100000	SMIM2, SERP2, TSC22D1	3
	chr12	22170001	22700000	COG6	1
	chr12	25210001	26060000	SOHLH2, DCLK1, NBEA, MAB21L1	4
	chr12	29820001	30490000	LOC101906564, TEX26, MEDAG, ALOX5AP, USPL1, HMGB1, KATNAL1	7
	chr12	33130001	33880000	CDK8, RNF6, LOC536660, SHISA2, ATP8A2	5
	chr12	34720001	35430000	SGCG, FGF9	2
	chr12	46120001	47460000	DACH1	1
	chr12	47750001	49170000	PIBF1, KLF5, KLF12	3
	chr12	49260001	49800000		0
	chr12	50900001	51580000		0
	chr12	65300001	65800000	LOC112449108, GPC5	2
	chr12	70890001	72790000	LOC100336232, LOC522174, LOC107131273, LOC107131218, LOC112449073, LOC100337053, LOC100337076, LOC100337108, LOC112449109, LOC112449072, LOC104970698, LOC112449074, LOC100337390	13
	chr12	73440001	74200000	HS6ST3, OXGR1	2
	chr12	79130001	80120000	SLC10A2	1
	chr12	80300001	81190000		0
	chr12	81270001	82240000	EFNB2	1
	chr13	880001	1390000	PLCB1	1
	chr13	1550001	2120000	PLCB1, PLCB4	2
	chr13	14720001	15950000	GATA3	1
	chr13	16380001	16950000	SFMBT2, PRKCQ	2
	chr13	26350001	27230000	MYO3A, GAD2, GJD4, FZD8	4
	chr13	28570001	29210000	FRMD4A	1
	chr13	30370001	30900000	MINDY3	1
	chr13	35280001	36040000	MAP3K8, LYZL1, BAMBI	3
	chr13	39770001	40610000	CFAP61, INSM1, RALGAPA2, LOC104973781, KIZ	5
	chr13	41410001	42100000	FOXA2, THBD, CD93, NXT1, GZF1, NAPB, CSTL1, CST11	8
	chr13	43790001	44590000	20ALPHA-HSD, LOC112441521, LOC615959, LOC515358	4
	chr13	44630001	45360000	LOC112449302, PITRM1, PFKP	3
	chr13	47800001	48600000	LOC513580, SHLD1, CHGB, TRMT6, MCM8, CRLS1, LRRN4, FERMT1	8
	chr13	54070001	54820000	RTEL1, STMN3, GMEB2, FNDC11, SRMS, PTK6, PPDPF, EEF1A2, KCNQ2, CHRNA4, COL20A1, ARFGAP1, NKAIN4, BIRC7, LOC112449235, YTHDF1, BHLHE23, SLC17A9, GID8, DIDO1, TCFL5, COL9A3, OGFR, MRGBP, NTSR1, SLCO4A1, GATA5	27
	chr13	55170001	55750000	CDH4	1
	chr13	56030001	57350000	CDH26, FAM217B, PPP1R3D, SYCP2, PHACTR3, EDN3, ZNF831, PRELID3B	8
	chr13	75190001	75780000	LOC100847115, OCSTAMP, SLC13A3, TP53RK, SLC2A10, EYA2, ZMYND8	7
	chr14	1	600000	LOC112449588, LOC782261, LOC789384, ZNF16, C14H8orf33, ZNF34, RPL8, ZNF7, COMMD5, ARHGAP39, C14H8orf82, LRRC24, LRRC14, RECQL4, MFSD3, GPT, PPP1R16A, FOXH1, KIFC2, CYHR1, TONSL, VPS28, SLC39A4, CPSF1, ADCK5, SLC52A2, FBXL6, TMEM249, SCRT1	29
	chr14	1680001	2200000	LYPD2, SLURP1, THEM6, PSCA, JRK, ARC, LOC101905222, ADGRB1, TSNARE1	9
	chr14	3630001	4650000	KCNK9, COL22A1, FAM135B	3
	chr14	6190001	7450000	KHDRBS3, LOC112449602, ZFAT	3
	chr14	7490001	8160000	ST3GAL1, NDRG1, WISP1	3
	chr14	8570001	9070000	TMEM71, LRRC6, KCNQ3, HHLA1	4
	chr14	9530001	10720000	ADCY8, ASAP1, FAM49B	3
	chr14	10780001	11330000	GSDMC, LOC100299192	2
	chr14	11430001	11940000		0
	chr14	12220001	12920000	MYC	1
	chr14	18460001	19040000	LOC529047, LOC100297500	2
	chr14	19620001	20330000	EFCAB1, SNAI2, PPDPFL, SNTG1	4
	chr14	22440001	22970000	XKR4	1
	chr14	23010001	23650000	TMEM68, TGS1, LYN, RPS20, MOS, PLAG1, CHCHD7, SDR16C5, SDR16C6, PENK	10
	chr14	25130001	25880000	TOX	1
	chr14	26510001	27010000	CLVS1	1
	chr14	27320001	28090000	NKAIN3, GGH, TTPA	3
	chr14	28180001	29470000	CYP7B1, BHLHE22	2
	chr14	35340001	36380000	MSC, TRPA1, KCNB2	3
	chr14	40620001	41300000	LOC782385	1
	chr14	41920001	42590000	ZC2HC1A, IL7	2
	chr14	47670001	48480000		0
	chr14	48570001	49230000	TRPS1	1
	chr14	58820001	59370000	ZFPM2	1
	chr14	59540001	60070000	LRP12	1
	chr14	66730001	67240000	TSPYL5, CPQ	2
	chr14	68310001	69030000		0
	chr15	7780001	8390000	PGR, ARHGAP42	2
	chr15	20670001	21230000	ARHGAP20	1
	chr15	22730001	23470000		0
	chr15	26340001	27400000		0
	chr15	27980001	28810000	BACE1, CEP164, DSCAML1, FXYD2, FXYD6, TMPRSS13, IL10RA, SMIM35, TMPRSS4	9
	chr15	30220001	30920000	NECTIN1, TRIM29, OAF, POU2F3, TMEM136	5
	chr15	31100001	31970000	ARHGEF12, GRIK4, TBCEL, TECTA, SC5D	5
	chr15	32500001	33330000	UBASH3B	1
	chr15	37040001	37560000	INSC, CALCB	2
	chr15	43960001	44500000	STK33, LMO1, RIC3, TUB	4
	chr16	2280001	2860000	MDM4, LRRN2, NFASC, CNTN2	4
	chr16	6360001	6910000	KCNT2, LOC101907330	2
	chr16	7300001	9590000	LOC789494	1
	chr16	12620001	13400000	RGS13, RGS1, RGS21, RGS18	4
	chr16	15990001	16750000		0
	chr16	20110001	20620000	ESRRG	1
	chr16	41760001	42370000	NPPB, NPPA, CLCN6, MTHFR, C16H1orf167, AGTRAP, DRAXIN, MAD2L2, FBXO6, FBXO44, FBXO2, DISP3	12
	chr16	47090001	47690000	GPR153, HES3, ICMT, RNF207, RPL22, CHD5, KCNAB2, NPHP4	8
	chr16	49820001	50510000	PRDM16, ACTRT2, LOC101904409, TTC34, MMEL1, FAM213B, HES5, PANK4, PLCH2, PEX10, RER1, MORN1	12
	chr16	52000001	52930000	CASP9, CELA2A, CTRC, EFHD2, FHAD1, TMEM51, KAZN	7
	chr16	53290001	53790000	LOC112441849, PRDM2	2
	chr16	56270001	57200000	TNN, KIAA0040, TNR	3
	chr16	57440001	58670000	PAPPA2, ASTN1, BRINP2	3
	chr16	62350001	62960000	CACNA1E	1
	chr16	67500001	68210000	PDC, PTGS2, PLA2G4A	3
	chr16	69780001	70340000		0
	chr16	72780001	73440000	HHAT, SERTAD4, SYT14	3
	chr16	77210001	77970000	NEK7, ATP6V1G3, PTPRC	3
	chr17	1310001	1970000	TLL1, MAP9	2
	chr17	19650001	20160000		0
	chr17	28990001	29550000	JADE1, LOC100140839, LOC101903064, PGRMC2, LARP1B	5
	chr17	33660001	34350000		0
	chr17	38900001	39430000		0
	chr17	44530001	45050000	POLE, P2RX2, LRCOL1, FBRSL1, GALNT9, NOC4L, DDX51, EP400	8
	chr17	54590001	55170000	CCDC63, MYL2, CUX2, PHETA1, SH2B3	5
	chr17	57210001	57800000	KSR2, NOS1	2
	chr17	58140001	58640000	FBXW8, HRK, RNFT2, C17H12orf49, MED13L	5
	chr17	58890001	60620000	MED13L, TBX3, TBX5, RBM19	4
	chr17	65750001	67170000	SEZ6L, ASPHD2, HPS4, SRRD, TFIP11, TPST2, CRYBB1, CRYBA4, LOC614881	9
	chr18	4120001	4950000	LOC112442231, MON1B, SYCE1L, ADAMTS18	4
	chr18	5290001	7280000	WWOX, MAF	2
	chr18	7420001	8480000	CDYL2, CMC2, CENPN, ATMIN, C18H16orf46, GCSH, PKD1L2, BCO1, GAN, CMIP, PLCG2	11
	chr18	11650001	12310000	GINS2, C18H16orf74, EMC8, COX4I1, IRF8	5
	chr18	22470001	23950000	IRX3, IRX5, IRX6, MMP2, LPCAT2, CAPNS2, SLC6A2, CES1	8
	chr18	24900001	25430000	SLC12A3, HERPUD1, NLRC5, CPNE2, FAM192A, RSPRY1, ARL2BP, PLLP, CCL22, CX3CL1, CCL17	11
	chr18	29150001	29690000	LOC100139919, CDH8	2
	chr18	31360001	31920000		0
	chr18	32290001	32820000	CDH11	1
	chr18	33160001	34140000	CDH5	1
	chr18	35610001	36130000	NFATC3, ESRP2, PLA2G15, SLC7A6, SLC7A6OS, PRMT7, SMPD3, ZFP90, CDH3, CDH1, TANGO6	11
	chr18	37100001	38120000		0
	chr18	39460001	40540000	TAT, CHST4, ZNF19, ZNF23, LOC505120, CALB2, CMTR2, LOC112442305, HYDIN, POP4, PLEKHF1, C18H19orf12, CCNE1	13
	chr18	40610001	41650000	ZNF536	1
	chr18	47460001	48060000	ZNF570, ZNF420, ZNF345, LOC519309, ZFP30, LOC787397, LOC112442402, LOC107131422, WDR87, SIPA1L3, DPF1	11
	chr18	53050001	53590000	FOSB, RTN2, PPM1N, VASP, OPA3, GPR4, EML2, GIPR, SNRPD2, QPCTL, FBXO46, BHMG1, SIX5, DMPK, DMWD, RSPH6A, SYMPK, FOXA3, IRF2BP1, MYPOP, NANOS2, NOVA2, CCDC61, PGLYRP1, IGFL1, HIF3A	26
	chr19	24890001	25490000	SPNS2, MYBBP1A, GGT6, TEKT1, SMTNL2, FBXO39, XAF1, SLC13A5, C19H17orf100, MED31, TXNDC17, KIAA0753, PITPNM3, PIMREG, AIPL1	15
	chr19	28140001	29310000	MYH10, CCDC42, MFSD6L, PIK3R6, PIK3R5, NTN1, LOC104975027, STX8, CFAP52, USP43, DHRS7C, GSG1L2, GLP2R, RCVRN, GAS7	15
	chr19	29770001	30280000	PIRT, SHISA6	2
	chr19	31380001	31880000	HS3ST3A1	1
	chr19	31930001	32720000	COX10, HS3ST3B1	2
	chr19	57250001	58250000	LOC112442754, SDK2, CDC42EP4, CPSF4L, C19H17orf80, FAM104A, COG1, SLC39A11, SSTR2	9
	chr20	1290001	2290000	SPDL1, DOCK2, FAM196B, FOXI1, C20H5orf58, LCP2, KCNIP1, KCNMB1	8
	chr20	2350001	2930000	KCNIP1, GABRP, RANBP17	3
	chr20	4080001	4590000	SH3PXD2B, NEURL1B, DUSP1	3
	chr20	14770001	15390000	SHISAL2B, RGS7BP, RNF180	3
	chr20	17260001	17850000	LOC781741, ZSWIM6	2
	chr20	21330001	21980000	ACTBL2	1
	chr20	24610001	25400000	HSPB3, ARL15	2
	chr20	25520001	26080000	FST, MOCS2, ITGA2	3
	chr20	26730001	27520000		0
	chr20	29020001	29730000	HCN1	1
	chr20	33740001	34480000	PTGER4	1
	chr20	36050001	36690000	EGFLAM, GDNF, WDR70	3
	chr20	42200001	42920000	CDH6	1
	chr20	48380001	49010000	CDH10	1
	chr20	52380001	52900000		0
	chr20	54410001	55240000		0
	chr20	58880001	59400000	TRIO, DNAH5	2
	chr20	63230001	64210000	TAS2R1, SEMA5A	2
	chr20	67100001	67600000		0
	chr20	68510001	69120000		0
	chr21	8110001	8850000	PGPEP1L, FAM169B, ARRDC4	3
	chr21	11550001	12070000		0
	chr21	12930001	13960000		0
	chr21	18360001	19010000	NTRK3	1
	chr21	29490001	30010000	CHRNA7, OTUD7A	2
	chr21	35350001	36460000		0
	chr21	39120001	39830000	FOXG1, LOC101905308	2
	chr21	43650001	44360000	NPAS3	1
	chr21	47910001	48640000	TTC6, SSTR1, CLEC14A	3
	chr21	58770001	59330000	PPP4R4, SERPINA10, SERPINA6, SERPINA1, SERPINA11, SERPINA14, SERPINA12, SERPINA4, SERPINA5, SERPINA3-8	10
	chr21	62780001	63370000		0
	chr21	63430001	63950000		0
	chr21	65780001	66680000	RTL1, DIO3, PPP2R5C	3
	chr22	1780001	2690000	SLC4A7, EOMES, CMC1	3
	chr22	19340001	19850000	GRM7	1
	chr22	29280001	29990000	PROK2, GPR27, EIF4E3	3
	chr22	36510001	37420000	ADAMTS9, PRICKLE2	2
	chr22	39640001	40540000	PTPRG, FHIT	2
	chr22	40890001	41730000	FHIT	1
	chr22	45120001	46380000	ERC2, WNT5A, CACNA2D3, LRTM1	4
	chr22	54490001	55580000	ATP2B2, SLC6A11, SLC6A1, HRH1, ATG7, VGLL4	6
	chr23	4710001	5310000	HMGCLL1, GFRAL, HCRTR2	3
	chr23	14030001	14970000	LRFN2, UNC5CL, TSPO2	3
	chr23	15710001	16230000	CCND3, TAF8, C23H6orf132, MGC137036, GUCA1A, GUCA1B, MRPS10, TRERF1	8
	chr23	33370001	34100000	DCDC2, NRSN1	2
	chr23	36170001	36730000	SOX4	1
	chr23	43380001	43900000	PHACTR1	1
	chr23	48180001	48730000	RREB1, LY86	2
	chr24	1280001	1910000		0
	chr24	4700001	5590000	NETO1, CBLN2	2
	chr24	29680001	30330000	CHST9, AQP4, KCTD1	3
	chr24	36040001	36740000		0
	chr24	42160001	43040000	APCDD1, NAPG, PIEZO2, GNAL, CHMP1B, MPPE1, IMPA2, CIDEA, TUBB6, AFG3L2, PRELID3A, SPIRE1	12
	chr24	47860001	48550000	ZBTB7C, LOC112444196, CTIF	3
	chr24	49510001	50360000	MYO5B, CFAP53, MBD1, CXXC1, SKA1, MAPK4, MRO	7
	chr24	53940001	54590000	LOC100137989, DYNAP, RAB27B, CCDC68	4
	chr24	54850001	55940000	TCF4, TXNL1	2
	chr25	5550001	6210000	RBFOX1	1
	chr25	15840001	16420000	XYLT1	1
	chr25	17310001	18090000	KNOP1, IQCK, GPRC5B, GPR139, GP2, UMOD, PDILT	7
	chr25	21330001	22050000	DCTN5, PLK1, ERN2, CHP2, PRKCB, CACNG3	6
	chr25	25120001	25620000	KIAA0556, GSG1L	2
	chr25	26220001	26980000	ALDOA, FAM57B, C25H16orf92, DOC2A, INO80E, HIRIP3, TAOK2, TMEM219, KCTD13, ASPHD1, SEZ6L2, LOC112444288, CDIPT, MVP, PAGR1, PRRT2, MAZ, KIF22, ZG16, C25H16orf54, QPRT, SPN, CD2BP2, LOC614614, TBC1D10B, MYLPF, 1-Sep, ZNF48, ZNF771, DCTPP1, SEPHS2, ITGAL, ZNF768, LOC100847190, ZNF688, ZNF689, PRR14, FBRS, LOC112444289, TMEM265, PHKG2, CCDC189, RNF40, ZNF629, BCL7C, CTF1	46
	chr25	31930001	32550000		0
	chr26	19490001	20090000	PYROXD2, HPS1, HPSE2	3
	chr26	29820001	30430000		0
	chr26	31640001	32510000		0
	chr26	40220001	40840000	PLPP4, WDR11	2
	chr26	40900001	41650000	FGFR2	1
	chr26	43120001	44040000	GPR26, CPXM2, CHST15	3
	chr26	44710001	45250000	CTBP2, TEX36	2
	chr26	46230001	46860000	DOCK1, FAM196A	2
	chr26	46950001	47620000	NPS, FOXI2, CLRN3, PTPRE, MKI67	5
	chr26	47660001	48480000		0
	chr27	590001	1230000	DLGAP2, CLN8	2
	chr27	4290001	5210000		0
	chr27	7790001	8300000	VEGFC	1
	chr27	10520001	11270000		0
	chr27	12140001	13040000		0
	chr27	15760001	16460000	SORBS2, TLR3, FAM149A, CYP4V2, KLKB1, F11, MTNR1A, FAT1	8
	chr27	23620001	24420000	DLC1, LOC104976084, TRMT9B, LONRF1	4
	chr27	25660001	26230000	DUSP4, LOC101904305	2
	chr27	27570001	28970000	NRG1	1
	chr27	29290001	30190000		0
	chr27	31550001	33010000	KCNU1, LOC112444612, ZNF703	3
	chr28	9930001	10810000	RYR2, ZP4	2
	chr28	11270001	12740000	CHRM3	1
	chr28	27070001	27640000	PCBD1, UNC5B, SLC29A3, CDH23	4
	chr28	30940001	31890000	VDAC2, COMTD1, LOC508976, LOC101903749, ZNF503, LRMDA	6
	chr28	34010001	34750000		0
	chr29	10730001	11840000	DLG2	1
	chr29	13990001	14490000		0
	chr29	16850001	17450000	TENM4, LOC100126230	2
	chr29	19890001	20740000	LUZP2	1
	chr29	23160001	23690000	NELL1	1
	chr29	24740001	25620000	DBX1, NAV2	2
	chr29	29650001	31060000	DCPS, ST3GAL4, KIRREL3	3

## Sheet: Table S4
	Table S4 Unmapped reads and contig information for 897 animals
	ID	contig number(>=1000bp)	purfied contig number(>=1000bp)
	Bostaurus_K894-01-R01_good	2438	1095
	Bostaurus_K894-01-R02_good	1095	897
	Bostaurus_K894-01-R03_good	11587	1636
	Bostaurus_K894-01-R04_good	5727	872
	Bostaurus_K894-01-R05_good	11340	1668
	Bostaurus_K894-01-R06_good	2989	1075
	Bostaurus_K894-01-R07_good	2659	1139
	Bostaurus_K894-01-R08_good	1134	1094
	Bostaurus_K894-01-R09_good	3581	962
	Bostaurus_K894-01-R10_good	5427	903
	ERR320247	895	895
	ERR320251	958	958
	ERR320264	1051	1051
	ERR454993	914	914
	SAMN01915358	253	252
	SAMN01915360	429	428
	SAMN01920653	375	374
	SAMN03387020	1652	1652
	SAMN03387023	3115	1727
	SAMN03839032	144	144
	SAMN05216009	1736	1736
	SAMN05216010	1486	1486
	SAMN05216011	1494	1494
	SAMN05216012	1637	1637
	SAMN05216013	1497	1497
	SAMN05216014	1481	1481
	SAMN05216015	1654	1653
	SAMN05216016	2102	2100
	SAMN05216017	1483	1483
	SAMN05216018	1258	1258
	SAMN05216019	1713	1713
	SAMN05216020	1350	1350
	SAMN05216021	1563	1561
	SAMN05216022	1656	1656
	SAMN05216023	1770	1770
	SAMN05216024	1487	1486
	SAMN05216025	1188	1187
	SAMN05216026	1237	1236
	SAMN05216027	1636	1635
	SAMN05216028	1519	1519
	SAMN05216029	1571	1570
	SAMN05216030	2098	2098
	SAMN05216031	1586	1584
	SAMN05216032	1481	1481
	SAMN05216033	663	663
	SAMN05216034	1551	1550
	SAMN05216035	2239	2238
	SAMN05216036	2022	2021
	SAMN05216037	1546	1546
	SAMN05216038	1593	1593
	SAMN05216051	1831	1830
	SAMN05216052	1340	1339
	SAMN05216053	3141	3139
	SAMN05216054	2340	2340
	SAMN05216055	1454	1454
	SAMN05788479	2014	2012
	SAMN05788480	745	740
	SAMN05788481	1926	1924
	SAMN05788482	1901	1899
	SAMN05788483	1089	1089
	SAMN05788486	4238	899
	SAMN05788497	1296	1296
	SAMN05788507	3475	1545
	SAMN05788510	2025	2023
	SAMN05788511	1694	1694
	SAMN05788516	472	472
	SAMN05788517	245	244
	SAMN05788518	740	716
	SAMN05788520	544	544
	SAMN05788521	296	295
	SAMN05788522	388	388
	SAMN05788523	347	347
	SAMN05788524	667	667
	SAMN05788525	216	216
	SAMN05788530	1339	747
	SAMN05788531	1589	1589
	SAMN05788534	1895	1464
	SAMN05788535	2113	1593
	SAMN05788536	2299	1163
	SAMN05788537	1597	1529
	SAMN05788538	1675	1542
	SAMN05788539	3041	1658
	SAMN05788540	1625	1625
	SAMN05788541	1673	1673
	SAMN05788542	1641	1636
	SAMN05788543	1281	1275
	SAMN05788544	1649	1545
	SAMN05788545	3346	1506
	SAMN05788546	1688	1477
	SAMN05788547	1810	1810
	SAMN05788548	1730	1730
	SAMN05788549	1619	1619
	SAMN05788550	1699	1698
	SAMN05788551	1630	1630
	SAMN05788552	1954	1954
	SAMN05788553	1836	1836
	SAMN05788554	1851	1849
	SAMN05788555	7982	2645
	SAMN05788556	1314	1312
	SAMN05788557	1446	1446
	SAMN05788558	1584	1583
	SAMN05788559	1268	1268
	SAMN05948863	823	823
	SAMN05948866	1767	1765
	SAMN08473804	3001	2998
	SAMN09379695	1946	1946
	SAMN09379696	1554	1554
	SAMN09379697	1475	1475
	SAMN09379698	1136	1123
	SAMN09379701	2188	2187
	SAMN09379704	1350	1342
	SAMN09379705	1456	1453
	SAMN09379706	1263	1251
	SAMN09379707	1839	1839
	SAMN09379708	2093	2089
	SAMN09379709	1694	1691
	SAMN09379710	1786	1786
	SAMN09379712	2817	2817
	SAMN09379713	1982	1962
	SAMN09379714	972	972
	SAMN09379716	1509	1508
	SAMN09379717	1637	1637
	SAMN09379718	1509	1501
	SAMN09379719	1241	1241
	SAMN09379720	2254	2254
	SAMN09379721	833	833
	SAMN09379722	1737	1737
	SAMN09379723	1617	1617
	SAMN09379724	1378	1378
	SAMN09379725	1886	1886
	SAMN09379726	1880	1880
	SAMN09379727	1454	1454
	SAMN09379728	2433	2432
	SAMN09379729	1431	1350
	SAMN09379730	1803	1803
	SAMN09379731	1586	1586
	SAMN09379732	1439	1439
	SAMN09379733	1551	1551
	SAMN09379734	1710	1710
	SAMN09379735	1421	1417
	SAMN09379736	1221	1221
	SAMN09379737	1271	1271
	SAMN09379738	2231	2231
	SAMN09379740	1496	1494
	SAMN09379741	1604	1468
	SAMN09379742	1560	1551
	SAMN09379743	1923	1757
	SAMN09379744	1624	1613
	SAMN09379746	1711	1711
	SAMN09379747	2096	2093
	SAMN09379748	2123	2108
	SAMN09379749	1570	1533
	SAMN09379750	353	353
	SAMN09379751	2174	2174
	SAMN09379752	1454	1344
	SAMN09379753	2094	2091
	SAMN09379754	1297	1176
	SAMN09379755	1460	1448
	SAMN09379756	1293	1214
	SAMN09379757	1557	1550
	SAMN09379760	2223	2223
	SAMN09379761	2459	2459
	SAMN09379762	1306	1306
	SAMN09379763	2203	2197
	SAMN09379764	1763	1763
	SAMN09379765	1178	950
	SAMN09379766	1691	1686
	SAMN09379767	1674	1666
	SAMN09379768	1545	1539
	SAMN09379769	1615	1599
	SAMN09379770	1365	1248
	SAMN09379771	1991	1931
	SAMN09379772	2995	1201
	SAMN09379773	2189	1456
	SAMN09379774	2521	1874
	SAMN09379776	1847	1514
	SAMN09379777	1436	1381
	SAMN09379778	1629	926
	SAMN09379779	1812	1611
	SAMN09379781	1814	1647
	SAMN09379782	4193	2511
	SAMN09379783	1866	1159
	SAMN09379784	1824	1812
	SAMN09379785	2405	2164
	SAMN09379786	3947	1142
	SAMN09379790	1884	1778
	SAMN09379791	3506	2045
	SAMN09379792	2184	1521
	SAMN09379793	1360	1347
	SAMN09379794	1715	1715
	SAMN09379795	1563	1562
	SAMN09379796	511	511
	SAMN09379797	1670	1667
	SAMN09379798	1599	1599
	SAMN09379799	1476	1474
	SAMN09379801	2302	2302
	SAMN09379802	1736	1728
	SAMN09379803	1780	1780
	SAMN09379805	1172	1172
	SAMN09379806	1292	1292
	SAMN09379807	1734	1573
	SAMN09379808	1125	1125
	SAMN09379809	924	924
	SAMN09379810	1830	1768
	SAMN09379811	1497	1207
	SAMN09379812	1012	1012
	SAMN09379813	1088	1088
	SAMN09379814	933	933
	SAMN09379815	928	928
	SAMN09379816	2199	2199
	SAMN09379817	881	881
	SAMN09379818	1157	1157
	SAMN09379819	1026	1026
	SAMN09379820	2165	2149
	SAMN09379821	2596	2596
	SAMN09379822	2327	2327
	SAMN09379823	1672	1634
	SAMN09379824	2105	2002
	SAMN09379825	5056	1690
	SAMN09379826	1393	1393
	SAMN09379827	1764	1643
	SAMN09379828	1069	1069
	SAMN09379829	834	822
	SAMN09379830	712	712
	SAMN09379831	1538	1529
	SAMN09379832	1113	1113
	SAMN10598558	2097	2095
	SAMN10940522	3591	1709
	SAMN10940523	1857	1856
	SAMN10940524	4101	1260
	SAMN10940541	1232	894
	SAMN10940542	1260	916
	SAMN10940543	864	864
	SAMN10940544	1626	1626
	SAMN10940545	1603	1602
	SAMN10940546	4031	1642
	SAMN10940547	2090	1757
	SAMN10940548	1876	1757
	SAMN10940549	5117	1715
	SAMN10940550	2809	935
	SAMN10940551	1636	1636
	SAMN10940552	1638	1638
	SAMN10940553	1487	1484
	SAMN10940554	1679	1679
	SAMN10940555	1557	1557
	SAMN10940556	2605	1632
	SAMN10940558	2094	1786
	SAMN10940559	4391	2414
	SAMN10940560	2086	1538
	SAMN10940561	2524	1615
	SAMN10940562	1576	1576
	SAMN10940704	1842	1842
	SAMN10940705	1718	1718
	SRR10992777	708	708
	SRR10992776	401	401
	SRR10992775	298	298
	SRR10992774	731	731
	SRR10752677	501	501
	SRR10752700	7820	3425
	SRR10752701	3172	3125
	SRR11235444	2192	2190
	SRR11235445	1065	1065
	SRR12452185	1064	1064
	SRR12452186	1091	1091
	SRR12452187	1687	1085
	SRR12452188	1094	1093
	SRR12452189	1122	1122
	SRR12452190	1049	1048
	SRR12452191	998	998
	SRR12452192	1028	1027
	SRR12452194	1022	1021
	SRR12452195	909	909
	SRR12452196	870	870
	SRR12452197	1115	1115
	SRR12452198	1043	1043
	SRR12452199	1126	1126
	SRR12452200	885	885
	SRR12452201	952	952
	SRR12452202	974	974
	SRR12452203	947	947
	SRR12452204	777	777
	SRR12452205	1042	1042
	SRR12452206	937	936
	SRR12452207	1196	1196
	SRR12452208	1165	1165
	SRR12452209	998	998
	SRR12452210	1108	1107
	SRR12452211	1101	1101
	SRR12452212	1122	1122
	SRR12452213	830	830
	SRR12452214	867	867
	SRR12452215	702	702
	SRR12452216	944	944
	SRR12452217	917	914
	SRR12452218	984	984
	SRR12452219	950	950
	SRR12452221	1133	1121
	SRR12452222	2212	971
	SRR12452223	1033	1033
	SRR12452224	2331	1113
	SRR12452225	2420	1214
	SRR12452226	1447	1123
	SRR12452227	1040	770
	SRR12452228	696	695
	SRR12452229	1122	1122
	SRR12452230	603	603
	SRR12452231	988	987
	SRR12452232	1114	1113
	SRR12452233	950	945
	SRR12452234	2012	965
	SRR12452235	1910	1036
	SRR12452236	1111	997
	SRR12452237	1246	1025
	SRR12452238	1322	1061
	SRR12452239	1761	1155
	SRR12452240	1384	1246
	SRR12452241	1070	1069
	SRR12452242	1142	1142
	SRR12452243	1151	1096
	SRR12452244	1330	1202
	SRR12452245	993	993
	SRR12452246	1074	1074
	SRR12452247	1189	1189
	SRR12452248	1102	1102
	SRR12452249	854	854
	SRR12452250	1258	989
	SRR12452251	958	956
	SRR12452252	598	595
	SRR12452253	1184	1184
	SRR12452254	1061	1059
	SRR12452255	757	756
	SRR12452256	1073	1073
	SRR12452257	933	930
	SRR12452258	810	808
	SRR12452259	1076	1075
	SRR12452260	939	937
	SRR12452261	708	707
	SRR12452262	1005	1004
	SRR12452263	2312	1033
	SRR12452265	1092	1092
	SRR12452266	1106	1106
	SRR12452267	853	851
	SRR12452268	1103	1101
	SRR12452269	1146	1146
	SRR12452270	1066	1064
	SRR12452271	874	874
	SRR12452272	930	927
	SRR12452273	761	761
	SRR12452274	776	776
	SRR12452275	849	849
	SRR12452276	1578	1135
	SRR12452277	968	968
	SRR12452278	1164	1164
	SRR12452279	1036	1034
	SRR12452280	1131	1130
	SRR12452281	1284	1284
	SRR12452282	1453	991
	SRR12452283	1070	1070
	SRR12452284	1143	966
	SRR12452285	2322	1105
	SRR12452286	1440	1132
	SRR12452287	1554	1100
	SRR12452288	1184	1105
	SRR12452289	1592	1127
	SRR12452290	1359	937
	SRR12452291	1771	1153
	SRR12452292	1320	1027
	SRR12452293	1656	1013
	SRR12452294	1126	1126
	SRR12452295	1527	992
	SRR12452296	1157	1036
	SRR12452297	1943	1119
	SRR12452298	1188	1188
	SRR1262533	674	674
	SRR1262536	265	265
	SRR1262538	292	291
	SRR1262539	190	189
	SRR1262658	198	197
	SRR1262660	809	808
	SRR1262661	233	233
	SRR1262662	741	741
	SRR1262663	327	326
	SRR1262664	204	204
	SRR1262672	129	129
	SRR1262679	1210	1210
	SRR1262718	1241	1240
	SRR1262724	725	725
	SRR1262725	122	122
	SRR1262726	271	271
	SRR1262727	666	665
	SRR1262728	547	547
	SRR1262736	136	136
	SRR1262737	757	740
	SRR1262738	595	594
	SRR1262756	596	595
	SRR1262770	709	706
	SRR1262776	505	503
	SRR1262777	523	522
	SRR1262787	546	545
	SRR1262788	1393	1393
	SRR1262789	571	571
	SRR1262790	365	363
	SRR1262791	352	350
	SRR1262792	307	305
	SRR1262793	260	259
	SRR1262794	496	494
	SRR1262795	289	285
	SRR1262796	378	376
	SRR1262797	233	232
	SRR1262799	514	512
	SRR1262800	229	226
	SRR1262801	332	331
	SRR1262802	564	562
	SRR1262803	410	408
	SRR1343160	751	749
	SRR1343161	651	651
	SRR1343163	634	634
	SRR1343166	4047	390
	SRR1343167	471	471
	SRR1343168	1113	1085
	SRR1343169	975	850
	SRR1343171	860	755
	SRR1343173	867	867
	SRR1343174	718	718
	SRR1346376	706	701
	SRR1346379	973	960
	SRR1346380	757	750
	SRR1346381	1396	877
	SRR1346382	753	752
	SRR1346383	961	706
	SRR1346384	720	719
	SRR1346385	2354	738
	SRR1346386	779	776
	SRR1346387	489	488
	SRR1346389	806	805
	SRR1346390	852	851
	SRR1346391	819	818
	SRR1346392	722	718
	SRR1348571	563	562
	SRR1348573	990	989
	SRR1348574	516	515
	SRR1348577	653	652
	SRR1348578	698	697
	SRR1348580	921	920
	SRR1348581	831	827
	SRR1348584	663	659
	SRR1348589	687	682
	SRR1348590	908	896
	SRR1348592	655	653
	SRR1355236	881	880
	SRR1355237	1108	952
	SRR1355244	1069	1068
	SRR1355253	917	910
	SRR1355254	867	866
	SRR1355255	595	594
	SRR1355257	809	802
	SRR1355258	708	706
	SRR1355260	1339	1026
	SRR1355261	1148	1144
	SRR1365103	1133	1132
	SRR1365104	1791	1232
	SRR1365105	858	857
	SRR1365106	3020	652
	SRR1365107	942	941
	SRR1365109	1144	807
	SRR1365110	782	780
	SRR1365111	849	847
	SRR1365113	993	861
	SRR1365114	2808	1056
	SRR1365122	889	885
	SRR1365124	1431	1166
	SRR1365126	1145	1143
	SRR1365127	1311	1310
	SRR1365128	804	802
	SRR1365129	1109	1107
	SRR1365130	1244	1210
	SRR1365131	1250	1249
	SRR1365132	1166	1163
	SRR1365133	884	882
	SRR1365134	501	480
	SRR1365136	834	788
	SRR1365137	834	833
	SRR1365139	1315	649
	SRR1365140	812	810
	SRR1365142	2929	878
	SRR1365144	3504	1319
	SRR1365145	1200	1199
	SRR1365147	1293	1292
	SRR1425122	1393	1389
	SRR1425124	1201	1200
	SRR1425133	1298	1297
	SRR1425134	1328	1319
	SRR1425137	1440	1437
	SRR1425138	794	788
	SRR1425139	939	937
	SRR1425140	840	835
	SRR1425144	834	832
	SRR1425147	1291	1289
	SRR1425148	745	743
	SRR1425149	772	770
	SRR1425150	743	742
	SRR1425155	603	599
	SRR1425156	718	716
	SRR1425157	599	598
	SRR1425158	810	808
	SRR1425159	938	685
	SRR1425160	694	693
	SRR1425161	772	770
	SRR1425163	218	217
	SRR1425164	788	787
	SRR1425165	586	585
	SRR1425166	2101	653
	SRR1462188	905	904
	SRR1525580	431	425
	SRR1525582	513	512
	SRR1525583	400	399
	SRR1525600	356	355
	SRR1525602	358	357
	SRR1525607	365	364
	SRR1525608	341	340
	SRR1525612	386	381
	SRR1525617	338	337
	SRR1525618	782	781
	SRR1525619	723	722
	SRR1525620	603	602
	SRR1525621	858	857
	SRR1525622	692	691
	SRR1525623	682	681
	SRR1525624	736	735
	SRR1525625	780	779
	SRR1525626	679	678
	SRR1525627	802	800
	SRR1525686	646	645
	SRR1525687	365	364
	SRR1525688	354	353
	SRR1525689	427	371
	SRR1525690	367	366
	SRR1525691	361	360
	SRR1525692	406	405
	SRR1525693	412	411
	SRR1525700	345	344
	SRR1525701	889	888
	SRR1525702	771	770
	SRR1525703	929	928
	SRR1525704	2343	1073
	SRR1525705	680	678
	SRR1525706	1061	940
	SRR1525707	788	787
	SRR1525708	766	765
	SRR1525709	867	866
	SRR1525710	815	814
	SRR1525711	580	579
	SRR1525712	685	679
	SRR1525713	710	709
	SRR1525714	725	724
	SRR1525715	993	699
	SRR1525716	997	983
	SRR1525717	871	870
	SRR1525718	1104	822
	SRR1525719	641	640
	SRR2016745	573	572
	SRR2016748	257	257
	SRR2016749	604	604
	SRR2016752	315	314
	SRR2016754	1172	1169
	SRR2016755	535	535
	SRR2016756	346	346
	SRR2016757	570	570
	SRR2016759	316	315
	SRR2016762	406	406
	SRR2016769	726	726
	SRR2016771	241	241
	SRR2016773	485	485
	SRR2016774	215	215
	SRR2016776	486	486
	SRR2016795	735	638
	SRR2016797	331	331
	SRR2016799	268	268
	SRR2226513	250	250
	SRR2226514	719	719
	SRR2226524	713	713
	SRR2770344	1189	1189
	SRR3219049	442	440
	SRR3225526	892	892
	SRR3490689	1004	1004
	SRR3491019	928	928
	SRR3496901	943	943
	SRR3499149	597	597
	SRR3501047	886	886
	SRR3505365	709	709
	SRR3505366	709	709
	SRR3506424	696	696
	SRR3507147	718	718
	SRR3507165	846	846
	SRR3507166	893	893
	SRR3507168	911	911
	SRR3508266	1006	1006
	SRR3508267	939	939
	SRR3524756	914	914
	SRR3524807	933	933
	SRR3524810	982	982
	SRR3546725	770	770
	SRR3546727	912	912
	SRR3546728	881	881
	SRR3546729	943	943
	SRR3546777	855	855
	SRR3546787	962	962
	SRR3592091	4247	1034
	SRR3592092	992	992
	SRR3592093	835	835
	SRR3694651	668	668
	SRR3694652	898	898
	SRR3694653	955	955
	SRR3694656	1010	1007
	SRR3694657	583	583
	SRR3694658	965	965
	SRR3694659	744	744
	SRR4279977	939	939
	SRR4279978	283	283
	SRR4279979	217	217
	SRR4280060	263	263
	SRR4280177	265	265
	SRR4280236	254	254
	SRR4280237	478	477
	SRR4280238	355	353
	SRR4280239	653	652
	SRR4435546	482	482
	SRR4435587	502	502
	SRR5137220	115	115
	SRR5137222	934	932
	SRR5137225	801	800
	SRR5137226	1068	1002
	SRR5137227	974	951
	SRR5137228	874	873
	SRR5137233	965	952
	SRR5137234	1047	1046
	SRR5137235	931	930
	SRR5137236	883	882
	SRR5137237	866	865
	SRR5137239	806	805
	SRR5137241	984	983
	SRR5137242	669	669
	SRR5137243	718	714
	SRR5137246	268	267
	SRR5137247	514	513
	SRR5137248	925	924
	SRR5507188	803	802
	SRR5507189	3290	1979
	SRR5507190	2028	1901
	SRR5507192	2283	2144
	SRR5507193	1350	1258
	SRR5507194	1724	1124
	SRR5507197	1497	1462
	SRR5507200	2941	1977
	SRR5507201	1486	1441
	SRR5507202	1304	1239
	SRR5507205	1522	1416
	SRR5507206	1560	1518
	SRR5507207	1332	1291
	SRR5507208	1650	1610
	SRR5507209	1441	1403
	SRR5507210	1765	1763
	SRR5507212	1978	1978
	SRR5507213	3348	2076
	SRR5507216	2416	1591
	SRR5507219	1453	1419
	SRR5507220	1622	1622
	SRR5507221	1650	1648
	SRR5507223	1130	1096
	SRR5507224	4600	1446
	SRR5507225	1378	1375
	SRR5507226	1609	1607
	SRR5507229	1040	1036
	SRR5507230	1784	1782
	SRR5507231	1668	1666
	SRR5507238	1480	1478
	SRR5507239	3966	1562
	SRR5507240	2572	1282
	SRR5507241	3123	1369
	SRR5507244	5775	1921
	SRR5507245	1484	1483
	SRR5507246	1537	1533
	SRR5507247	1289	1254
	SRR5507250	1543	1541
	SRR5507251	1338	1306
	SRR5507252	1336	1297
	SRR5507253	1206	1186
	SRR5507254	1536	1517
	SRR5507255	1212	1195
	SRR5507256	1291	1268
	SRR5507257	1499	1458
	SRR5507259	1284	1249
	SRR5507260	1401	1393
	SRR5507262	1546	1541
	SRR5507263	1485	1384
	SRR5507264	1641	1607
	SRR5507268	1396	1361
	SRR5507269	1393	1390
	SRR5507271	1961	1960
	SRR5507272	2967	1309
	SRR5507273	3984	1781
	SRR5507275	1520	1390
	SRR5507278	1596	1592
	SRR5507279	1756	1756
	SRR5507280	2078	2078
	SRR5507281	1887	1886
	SRR5507282	1687	1675
	SRR5507283	2152	2152
	SRR5507284	2179	2166
	SRR5507285	1359	1352
	SRR5507286	1692	1692
	SRR567198	1643	1642
	SRR6024563	119	119
	SRR6024564	1564	1524
	SRR6024565	1421	1408
	SRR6024566	1361	1314
	SRR6024567	1377	1329
	SRR6024568	1528	1495
	SRR6024570	1473	1430
	SRR6024573	1776	1768
	SRR6024575	2518	2087
	SRR6024576	1743	1620
	SRR6024577	1519	1482
	SRR6024578	1987	1986
	SRR6116785	2671	2645
	SRR6234766	442	440
	SRR6234767	987	985
	SRR6650020	941	940
	SRR6650021	272	272
	SRR6650023	1652	1651
	SRR6650031	1684	1683
	SRR7340660	517	517
	SRR7340661	517	506
	SRR7340670	421	415
	SRR7340671	775	775
	SRR7340672	375	374
	SRR7340673	202	201
	SRR7340674	250	249
	SRR7340675	301	300
	SRR7340677	212	210
	SRR7340688	285	284
	SRR7340700	591	589
	SRR7340701	276	193
	SRR7340702	619	615
	SRR7340703	642	639
	SRR7340705	469	467
	SRR7340706	476	474
	SRR7340718	681	677
	SRR7340722	602	599
	SRR7340724	327	327
	SRR7340726	978	977
	SRR7340729	353	352
	SRR7340731	122	121
	SRR7340734	874	874
	SRR7340735	727	727
	SRR7340736	1066	1064
	SRR7340737	1350	1346
	SRR7340750	300	300
	SRR7340751	369	367
	SRR7340752	147	146
	SRR7340753	227	226
	SRR7340754	98	97
	SRR7340755	176	175
	SRR7340756	1397	1397
	SRR7340757	238	236
	SRR7340758	211	210
	SRR7340780	432	430
	SRR7340781	822	818
	SRR7340782	459	455
	SRR7340783	465	462
	SRR7340784	473	471
	SRR7340785	419	415
	SRR7340786	654	651
	SRR7340787	460	456
	SRR7340788	450	446
	SRR7340796	397	389
	SRR7340798	429	428
	SRR7340800	295	294
	SRR7340801	78	77
	SRR7340802	380	379
	SRR7340803	301	300
	SRR7340804	882	815
	SRR7340805	352	352
	SRR7340829	91	91
	SRR7340830	671	671
	SRR7340832	304	302
	SRR7340847	1032	1032
	SRR7340850	1106	1106
	SRR7340852	723	722
	SRR7340855	1424	1423
	SRR7790708	1103	1093
	SRR7946693	1110	1035
	SRR7976535	285	285
	SRR7976539	894	803
	SRR7976618	946	944
	SRR8249134	838	836
	SRR8249135	109	109
	SRR8249136	257	257
	SRR8324568	243	243
	SRR8324570	1544	1539
	SRR8324572	1671	1666
	SRR8324573	3523	2662
	SRR8324574	1643	1626
	SRR8324575	1504	1500
	SRR8324576	1443	1443
	SRR8324577	1731	1730
	SRR8324578	2090	2089
	SRR8324579	1657	1654
	SRR8324580	1599	1598
	SRR8324581	1448	1448
	SRR8324583	1535	1534
	SRR8324589	1470	1466
	SRR8324595	1370	1369
	SRR8396974	1364	1363
	SRR8396975	694	693
	SRR8396976	1027	1024
	SRR8396977	1338	1305
	SRR8587904	3091	2840
	SRR8587906	785	785
	SRR8587907	798	798
	SRR8587910	896	896
	SRR8587916	894	894
	SRR8587917	888	888
	SRR8587918	929	929
	SRR8587919	722	722
	SRR8587920	2698	2694
	SRR8587922	2166	1986
	SRR8587923	2740	2738
	SRR8587924	2086	2025
	SRR8587925	2706	2646
	SRR8587926	2578	2395
	SRR8587927	2652	2357
	SRR8587928	2794	2723
	SRR8587930	2636	2633
	SRR8587969	5200	2347
	SRR8587976	515	515
	SRR8587999	756	756
	SRR8588021	862	862
	SRR8588062	1580	378
	SRR8588079	4225	3129
	SRR8588085	638	638
	SRR8588136	898	898
	SRR8588151	2428	2425
	SRR8588175	413	413
	SRR8588176	3960	2994
	SRR8588190	3544	2636
	SRR8588194	737	737
	SRR8588195	843	843
	SRR8588198	826	826
	SRR8588199	854	854
	SRR8588200	749	749
	SRR8588238	818	818
	SRR8588239	2946	699
	SRR8588257	2558	2553
	SRR8588258	2451	2445
	SRR8588259	2131	2125
	SRR8588260	927	927
	SRR866331	102	102
	SRR866340	235	234
	SRR866349	341	297
	SRR866387	258	258
	SRR866389	232	231
	SRR866391	253	252
	SRR866392	188	187
	SRR866394	260	260
	SRR866395	219	218
	SRR866397	234	234
	SRR866398	200	200
	SRR866420	193	193
	SRR866421	1793	307
	SRR866426	373	372
	SRR8727721	326	325
	SRR8727723	355	351
	SRR8727724	412	412
	SRR8727725	250	250
	SRR8727726	6923	290
	SRR926762	421	398
	SRR934395	900	900
	SRR934397	841	841
	SRR934399	736	736
	SRR934400	876	876
	SRR934401	934	934
	SRR934402	1043	1043
	SRR934403	1820	918
	SRR934404	895	883
	SRR934405	895	895
	SRR934415	877	877
	SRR934416	1123	1123
	SRR934417	1017	1017
	SRR934418	1076	1076
	SRR934419	1008	1008
	SRR934432	963	963
	SRR934433	1021	1021
	SRR934434	5280	1251
	SRR934435	952	952
	SRR934436	782	782
	SRR934437	849	849

## Sheet: Table S5
	Table S5 Novel sequences in the cow pan-genome
		Number of sequence contigs	Total length (bp)	Longest contig (bp)
	Two end	106	161769	6036
	One end with anchor	491	1828243	26688
	One end without anchor	1915	8599999	65055
	Unplaced	15719	73060462	82663
	Total	18231	83650473	82663

## Sheet: Table S6
	Table S6 Alignment of unplaced contigs to the Angus, Brahman, Brown Swiss, Jersey, Highland, Holstein, and Simmental genomes
		Alignment is ≥90% identity and ≥80% coverage
		Contigs	Length
	Matches Brahman	1062	1574950
	Matches Holstein	942	1436674
	Matches Angus	875	1339214
	Matches Brown_Swiss	842	1229595
	Matches Jersey	833	1295244
	Matches Simmental	769	1140935
	Matches Highland	641	968846
	Total	1699	2680019

## Sheet: Table S7
	Table S7 RNA sequencing data information
	Sample_ID	Tissue_cell_type	BioProject	Unmapped_read_count
	SRS625421	Adrenal_gland	PRJNA251439	57464
	SRR1616611	Alveolar_macrophages	PRJNA264301	2832494
	SRR1616613	Alveolar_macrophages	PRJNA264301	1716140
	SRR1616614	Alveolar_macrophages	PRJNA264301	8873862
	SRR1616615	Alveolar_macrophages	PRJNA264301	1765672
	SRR1616616	Alveolar_macrophages	PRJNA264301	1312066
	SRR1616617	Alveolar_macrophages	PRJNA264301	1835180
	SRR1616618	Alveolar_macrophages	PRJNA264301	1611440
	SRR1616619	Alveolar_macrophages	PRJNA264301	2411916
	SRR1616620	Alveolar_macrophages	PRJNA264301	1622598
	SRR1616621	Alveolar_macrophages	PRJNA264301	2242516
	SRR1616622	Alveolar_macrophages	PRJNA264301	1936930
	SRR1616623	Alveolar_macrophages	PRJNA264301	2052976
	SRR1616624	Alveolar_macrophages	PRJNA264301	1659092
	SRR1616625	Alveolar_macrophages	PRJNA264301	1875678
	SRR1616626	Alveolar_macrophages	PRJNA264301	3203988
	SRR1616627	Alveolar_macrophages	PRJNA264301	1588428
	SRR1616628	Alveolar_macrophages	PRJNA264301	2524588
	SRR1616629	Alveolar_macrophages	PRJNA264301	3059134
	SRR1616630	Alveolar_macrophages	PRJNA264301	3976660
	SRR1616631	Alveolar_macrophages	PRJNA264301	3331934
	SRR1616634	Alveolar_macrophages	PRJNA264301	1715844
	SRR1616635	Alveolar_macrophages	PRJNA264301	3692182
	SRR1616636	Alveolar_macrophages	PRJNA264301	3524398
	SRR1616637	Alveolar_macrophages	PRJNA264301	2022256
	SRR1616638	Alveolar_macrophages	PRJNA264301	2338136
	SRR1616639	Alveolar_macrophages	PRJNA264301	3154394
	SRR1616641	Alveolar_macrophages	PRJNA264301	1955644
	SRR1616642	Alveolar_macrophages	PRJNA264301	2764582
	SRR1616643	Alveolar_macrophages	PRJNA264301	1533622
	SRR1616644	Alveolar_macrophages	PRJNA264301	2271828
	SRR1616645	Alveolar_macrophages	PRJNA264301	2817748
	SRR1616646	Alveolar_macrophages	PRJNA264301	2222038
	SRR1616647	Alveolar_macrophages	PRJNA264301	2805892
	SRR1616648	Alveolar_macrophages	PRJNA264301	4278838
	SRR1616649	Alveolar_macrophages	PRJNA264301	2415812
	SRR1616650	Alveolar_macrophages	PRJNA264301	1525416
	SRR1616652	Alveolar_macrophages	PRJNA264301	1724036
	SRR1616653	Alveolar_macrophages	PRJNA264301	2033658
	SRR1616654	Alveolar_macrophages	PRJNA264301	1992484
	SRR1616655	Alveolar_macrophages	PRJNA264301	1960164
	SRR1616656	Alveolar_macrophages	PRJNA264301	1727722
	SRR1616657	Alveolar_macrophages	PRJNA264301	1996278
	SRR1616658	Alveolar_macrophages	PRJNA264301	2857256
	SRR1616659	Alveolar_macrophages	PRJNA264301	1909936
	SRR1616660	Alveolar_macrophages	PRJNA264301	943868
	SRR1616661	Alveolar_macrophages	PRJNA264301	1395518
	SRR1616662	Alveolar_macrophages	PRJNA264301	1526820
	SRR1616663	Alveolar_macrophages	PRJNA264301	1166836
	SRR1616664	Alveolar_macrophages	PRJNA264301	2509030
	SRR1616667	Alveolar_macrophages	PRJNA264301	1259504
	SRR1616668	Alveolar_macrophages	PRJNA264301	1790370
	SRR1616669	Alveolar_macrophages	PRJNA264301	1722050
	SRR1616670	Alveolar_macrophages	PRJNA264301	3475472
	SRR1616672	Alveolar_macrophages	PRJNA264301	4542276
	SRR1616673	Alveolar_macrophages	PRJNA264301	2027004
	SRR1616674	Alveolar_macrophages	PRJNA264301	2332680
	SRR1616675	Alveolar_macrophages	PRJNA264301	3094940
	SRR1616676	Alveolar_macrophages	PRJNA264301	3190230
	SRR1616677	Alveolar_macrophages	PRJNA264301	2614398
	SRR1616678	Alveolar_macrophages	PRJNA264301	2139826
	SRR1616679	Alveolar_macrophages	PRJNA264301	2547272
	SRR1616680	Alveolar_macrophages	PRJNA264301	2157034
	SRR1616681	Alveolar_macrophages	PRJNA264301	3654612
	SRR1616682	Alveolar_macrophages	PRJNA264301	5485316
	SRR1616683	Alveolar_macrophages	PRJNA264301	2054638
	SRR1616684	Alveolar_macrophages	PRJNA264301	2787024
	SRR1616685	Alveolar_macrophages	PRJNA264301	3463588
	SRR1616686	Alveolar_macrophages	PRJNA264301	2531190
	SRR1616687	Alveolar_macrophages	PRJNA264301	1768286
	SRR1616688	Alveolar_macrophages	PRJNA264301	3033166
	ERR2232450	Blood	PRJEB24166	6177112
	ERR2727704	Blood	PRJEB28074	936092
	ERR2727705	Blood	PRJEB28074	629418
	ERS1795988	Blood	PRJEB21455	5026550
	ERS1795999	Blood	PRJEB21455	5336738
	ERS1796000	Blood	PRJEB21455	4141034
	ERS1796001	Blood	PRJEB21455	4726322
	ERS1796003	Blood	PRJEB21455	4576856
	ERS1796005	Blood	PRJEB21455	4309134
	ERS1796007	Blood	PRJEB21455	4676130
	ERS1796008	Blood	PRJEB21455	4486354
	ERS1796009	Blood	PRJEB21455	4056288
	ERS1796010	Blood	PRJEB21455	6575508
	ERS1796013	Blood	PRJEB21455	5335480
	ERS1796014	Blood	PRJEB21455	5769630
	ERS1796015	Blood	PRJEB21455	4795930
	ERS1796017	Blood	PRJEB21455	5988168
	SRR3306187	Blood	PRJNA316613	2489230
	SRR3306188	Blood	PRJNA316613	3031228
	SRR3306189	Blood	PRJNA316613	2670600
	SRR3306190	Blood	PRJNA316613	2787234
	SRR3306191	Blood	PRJNA316613	5304042
	SRR3306192	Blood	PRJNA316613	2822142
	SRR3306193	Blood	PRJNA316613	2365600
	SRR3306194	Blood	PRJNA316613	2822566
	SRR3306195	Blood	PRJNA316613	4739816
	SRR3306196	Blood	PRJNA316613	3309422
	SRR3954492	Blood	PRJNA335422	2245680
	SRR3954493	Blood	PRJNA335422	1477106
	SRR3954494	Blood	PRJNA335422	1528962
	SRR3954495	Blood	PRJNA335422	1913870
	SRR3954496	Blood	PRJNA335422	1739628
	SRR3954497	Blood	PRJNA335422	1448110
	SRR3954498	Blood	PRJNA335422	1030230
	SRR3954499	Blood	PRJNA335422	1387326
	SRR3954500	Blood	PRJNA335422	1537718
	SRR3954501	Blood	PRJNA335422	1320140
	SRR3954506	Blood	PRJNA335422	1939234
	SRR3954507	Blood	PRJNA335422	1749450
	SRR3954508	Blood	PRJNA335422	1305844
	SRR3954509	Blood	PRJNA335422	1885862
	SRR3954510	Blood	PRJNA335422	1633340
	SRR3954511	Blood	PRJNA335422	1416406
	SRR3954512	Blood	PRJNA335422	1734866
	SRR3954513	Blood	PRJNA335422	2293114
	SRR3954514	Blood	PRJNA335422	2018750
	SRR3954516	Blood	PRJNA335422	2000918
	SRR3954517	Blood	PRJNA335422	1509836
	SRR3954518	Blood	PRJNA335422	1567722
	SRR3954519	Blood	PRJNA335422	1375144
	SRR3954520	Blood	PRJNA335422	1847116
	SRR3954521	Blood	PRJNA335422	1432024
	SRR3954522	Blood	PRJNA335422	1801304
	SRR3954524	Blood	PRJNA335422	1341268
	SRR3954525	Blood	PRJNA335422	1504062
	SRR3954527	Blood	PRJNA335422	2482062
	SRR3954528	Blood	PRJNA335422	1988440
	SRR3954529	Blood	PRJNA335422	1308894
	SRR3954530	Blood	PRJNA335422	1714656
	SRR3954531	Blood	PRJNA335422	1750528
	SRR3954532	Blood	PRJNA335422	1855546
	SRR3954533	Blood	PRJNA335422	3603828
	SRR3954534	Blood	PRJNA335422	176064
	SRR3954535	Blood	PRJNA335422	1864472
	SRR3954536	Blood	PRJNA335422	1888236
	SRR3954537	Blood	PRJNA335422	2633626
	SRR3954538	Blood	PRJNA335422	2843726
	SRR3954539	Blood	PRJNA335422	2031578
	SRR3954540	Blood	PRJNA335422	1964280
	SRR3954541	Blood	PRJNA335422	2123370
	SRR3954542	Blood	PRJNA335422	1612152
	SRR3954544	Blood	PRJNA335422	1903192
	SRR3954545	Blood	PRJNA335422	1927736
	SRR3954546	Blood	PRJNA335422	1816446
	SRR3954547	Blood	PRJNA335422	427618
	SRR3954548	Blood	PRJNA335422	2464512
	SRR3954550	Blood	PRJNA335422	1631972
	SRR3954551	Blood	PRJNA335422	1794104
	SRR3954552	Blood	PRJNA335422	1246148
	SRR3954553	Blood	PRJNA335422	522312
	SRR3954554	Blood	PRJNA335422	1518320
	SRR3954555	Blood	PRJNA335422	1244050
	SRR3954556	Blood	PRJNA335422	1243842
	SRR3954557	Blood	PRJNA335422	1098576
	SRR3954558	Blood	PRJNA335422	1632452
	SRR3954559	Blood	PRJNA335422	1629798
	SRR3954560	Blood	PRJNA335422	992362
	SRR3954561	Blood	PRJNA335422	932854
	SRR3954562	Blood	PRJNA335422	827260
	SRR3954565	Blood	PRJNA335422	1875058
	SRR3954596	Blood	PRJNA335422	1124020
	SRR3954597	Blood	PRJNA335422	1367060
	SRR3954598	Blood	PRJNA335422	1074314
	SRR3954599	Blood	PRJNA335422	936870
	SRR3954600	Blood	PRJNA335422	1110288
	SRR3954601	Blood	PRJNA335422	1292000
	SRR3954602	Blood	PRJNA335422	1505502
	SRR3954603	Blood	PRJNA335422	1012268
	SRR3954604	Blood	PRJNA335422	1106778
	SRR3954605	Blood	PRJNA335422	1233636
	SRR3954606	Blood	PRJNA335422	826890
	SRR3954607	Blood	PRJNA335422	1139074
	SRR3954608	Blood	PRJNA335422	1249614
	SRR3954609	Blood	PRJNA335422	1517012
	SRR3954610	Blood	PRJNA335422	1105952
	SRR3954611	Blood	PRJNA335422	1081048
	SRR3954613	Blood	PRJNA335422	1408404
	SRR3954614	Blood	PRJNA335422	960232
	SRR3954615	Blood	PRJNA335422	1149798
	SRR3954616	Blood	PRJNA335422	933096
	SRR3954617	Blood	PRJNA335422	1203218
	SRR3954618	Blood	PRJNA335422	1119252
	SRR3954619	Blood	PRJNA335422	1187658
	SRR3954620	Blood	PRJNA335422	557252
	SRR3954621	Blood	PRJNA335422	1151414
	SRR3954622	Blood	PRJNA335422	1014616
	SRR3954623	Blood	PRJNA335422	506392
	SRR3954624	Blood	PRJNA335422	1116234
	SRR3954625	Blood	PRJNA335422	1117288
	SRR3954626	Blood	PRJNA335422	856506
	SRR3954627	Blood	PRJNA335422	1071700
	SRR3954628	Blood	PRJNA335422	789138
	SRR3954629	Blood	PRJNA335422	1105766
	SRR3954630	Blood	PRJNA335422	1002494
	SRR3954631	Blood	PRJNA335422	812108
	SRR3954632	Blood	PRJNA335422	1048676
	SRR3954633	Blood	PRJNA335422	1227770
	SRR3954634	Blood	PRJNA335422	989112
	SRR3954635	Blood	PRJNA335422	802336
	SRR3954637	Blood	PRJNA335422	626766
	SRR3954639	Blood	PRJNA335422	1236186
	SRR3954640	Blood	PRJNA335422	1059372
	SRR3954641	Blood	PRJNA335422	833444
	SRR3954642	Blood	PRJNA335422	1138360
	SRR3954644	Blood	PRJNA335422	1087268
	SRR3954656	Blood	PRJNA335422	1448812
	SRR3954658	Blood	PRJNA335422	864602
	SRR3954659	Blood	PRJNA335422	967462
	SRR3954661	Blood	PRJNA335422	1124626
	SRR3954662	Blood	PRJNA335422	1411658
	SRR3954664	Blood	PRJNA335422	1008890
	SRR3954665	Blood	PRJNA335422	1339270
	SRR3954666	Blood	PRJNA335422	297638
	SRR3954668	Blood	PRJNA335422	933878
	SRR3954669	Blood	PRJNA335422	1062712
	SRR3954670	Blood	PRJNA335422	179612
	SRR3954671	Blood	PRJNA335422	1021814
	SRR3954672	Blood	PRJNA335422	980192
	SRR3954673	Blood	PRJNA335422	1319250
	SRR3954674	Blood	PRJNA335422	962478
	SRR3954675	Blood	PRJNA335422	329902
	SRR3954676	Blood	PRJNA335422	1082154
	SRR3954677	Blood	PRJNA335422	701586
	SRR3954678	Blood	PRJNA335422	754048
	SRR3954679	Blood	PRJNA335422	1090826
	SRR3954680	Blood	PRJNA335422	1117838
	SRR3954681	Blood	PRJNA335422	1142812
	SRR3954682	Blood	PRJNA335422	701718
	SRR3954683	Blood	PRJNA335422	1275702
	SRR3954684	Blood	PRJNA335422	397314
	SRR3954685	Blood	PRJNA335422	1000830
	SRR8767275	Blood	PRJNA528510	1562838
	SRR8767276	Blood	PRJNA528510	2354890
	SRR8767279	Blood	PRJNA528510	2990652
	SRR8767280	Blood	PRJNA528510	2660008
	SRR8767281	Blood	PRJNA528510	3867778
	SRR8767285	Blood	PRJNA528510	8235226
	SRR8767288	Blood	PRJNA528510	4802726
	SRR8937137	Blood	PRJNA534039	5255136
	SRR8937138	Blood	PRJNA534039	3702788
	SRR8937139	Blood	PRJNA534039	3591046
	SRR8937140	Blood	PRJNA534039	5817356
	SRR8937141	Blood	PRJNA534039	2465072
	SRR8937143	Blood	PRJNA534039	3808474
	SRR8937144	Blood	PRJNA534039	4888672
	SRR8937145	Blood	PRJNA534039	1750006
	SRR8937146	Blood	PRJNA534039	5043696
	SRR3309251	Blood	PRJNA316693	1238694
	SRR3309252	Blood	PRJNA316693	981380
	SRR3309253	Blood	PRJNA316693	859728
	SRR3309254	Blood	PRJNA316693	1048592
	SRR6019840	Blood(white_Blood_cells)	PRJNA403803	1925258
	SRR6019843	Blood(white_Blood_cells)	PRJNA403803	522430
	SRR6019844	Blood(white_Blood_cells)	PRJNA403803	1118482
	SRR6019845	Blood(white_Blood_cells)	PRJNA403803	1515574
	SRR6019847	Blood(white_Blood_cells)	PRJNA403803	1039302
	SRR6019848	Blood(white_Blood_cells)	PRJNA403803	2703992
	SRR6019849	Blood(white_Blood_cells)	PRJNA403803	543874
	SRR6019850	Blood(white_Blood_cells)	PRJNA403803	949600
	SRR6019851	Blood(white_Blood_cells)	PRJNA403803	2260020
	SRS1206435	Blood(white_Blood_cells)	PRJNA305942	5841386
	SRS1206444	Blood(white_Blood_cells)	PRJNA305942	3599812
	SRR7478851	Bovine_alveolar_macrophages	PRJNA480009	901324
	SRR7478852	Bovine_alveolar_macrophages	PRJNA480009	1134150
	SRR7478853	Bovine_alveolar_macrophages	PRJNA480009	1202318
	SRR7478854	Bovine_alveolar_macrophages	PRJNA480009	1104836
	SRR7478857	Bovine_alveolar_macrophages	PRJNA480009	1269374
	SRR594473	Brain	PRJNA177791	1652286
	SRR1952353	Bronchial_lymph_node	PRJNA272725	895752
	ERR2664177	CD4-positive_helper_T_cell	PRJEB27455	3128944
	ERR2664178	CD4-positive_helper_T_cell	PRJEB27455	3390864
	ERR2664179	CD4-positive_helper_T_cell	PRJEB27455	3864952
	ERR2664211	CD8-positive,_alpha-beta_cytotoxic_T_cell	PRJEB27455	4165608
	ERR2664212	CD8-positive,_alpha-beta_cytotoxic_T_cell	PRJEB27455	3806910
	ERR2664213	CD8-positive,_alpha-beta_cytotoxic_T_cell	PRJEB27455	3967066
	SRR4010654	Cecum	PRJNA338058	1843422
	SRR4010660	Cecum	PRJNA338058	6426858
	SRR4010666	Cecum	PRJNA338058	2639906
	SRS1051932	Cerebral_cortex	PRJNA294306	250320
	SRR594474	Colon	PRJNA177791	2976128
	SRR7014902	Colon	PRJNA450608	3012644
	SRR7014903	Colon	PRJNA450608	1392440
	SRR7014905	Colon	PRJNA450608	2258536
	SRR7014906	Colon	PRJNA450608	2598816
	SRR7014907	Colon	PRJNA450608	921898
	SRR7014908	Colon	PRJNA450608	1114116
	SRR7014909	Colon	PRJNA450608	871814
	SRR7014910	Colon	PRJNA450608	2237846
	SRR7014911	Colon	PRJNA450608	2602606
	SRR7014912	Colon	PRJNA450608	2331532
	SRR7014913	Colon	PRJNA450608	1558270
	SRR7014914	Colon	PRJNA450608	5309002
	SRR7014915	Colon	PRJNA450608	899984
	SRR7014916	Colon	PRJNA450608	3412132
	SRR7014917	Colon	PRJNA450608	6677596
	SRR7014918	Colon	PRJNA450608	2992258
	SRR7014920	Colon	PRJNA450608	4246546
	SRR7014922	Colon	PRJNA450608	2953874
	SRR7014923	Colon	PRJNA450608	3711990
	SRR7014924	Colon	PRJNA450608	2605788
	SRR7014925	Colon	PRJNA450608	2045168
	SRR7014926	Colon	PRJNA450608	2433898
	SRR7014928	Colon	PRJNA450608	3424842
	SRR4010634	Colon	PRJNA338058	7593718
	SRR4010640	Colon	PRJNA338058	5482582
	SRR4010658	Colon	PRJNA338058	1264146
	SRR4010664	Colon	PRJNA338058	7090738
	SRR4010670	Colon	PRJNA338058	5739642
	SRR4010621	Colon	PRJNA338058	6539458
	SRR4010639	Colon	PRJNA338058	3817542
	SRR4010645	Colon	PRJNA338058	7158758
	SRR4010651	Colon	PRJNA338058	1568504
	SRR4010657	Colon	PRJNA338058	3575750
	SRR4010663	Colon	PRJNA338058	6303708
	SRR4010669	Colon	PRJNA338058	2770212
	SRR2048594	Corpus_Luteum	PRJNA285675	560286
	SRR2048595	Corpus_Luteum	PRJNA285675	586376
	SRR2048597	Corpus_Luteum	PRJNA285675	628870
	SRR2048606	Corpus_Luteum	PRJNA285675	802870
	SRR2048623	Corpus_Luteum	PRJNA285675	737568
	SRR2659953	Corpus_Luteum	PRJNA298914	560288
	SRR2659954	Corpus_Luteum	PRJNA298914	586376
	SRR2659956	Corpus_Luteum	PRJNA298914	628870
	SRR2659958	Corpus_Luteum	PRJNA298914	802870
	SRR2659962	Corpus_Luteum	PRJNA298914	737568
	SRR4010647	Duodenum	PRJNA338058	1815852
	SRR4010653	Duodenum	PRJNA338058	1622168
	SRR4010659	Duodenum	PRJNA338058	4499660
	SRR4010665	Duodenum	PRJNA338058	2889942
	SRR5585842	Ear	PRJNA387436	245952
	SRR5585843	Ear	PRJNA387436	306370
	SRR5585844	Ear	PRJNA387436	338458
	SRR5602626	Embryo	PRJNA388055	4239236
	SRR5602627	Embryo	PRJNA388055	2546888
	SRR5602628	Embryo	PRJNA388055	1942514
	SRR5602629	Embryo	PRJNA388055	3654154
	SRR5602631	Embryo	PRJNA388055	659396
	SRR5602632	Embryo	PRJNA388055	3462336
	SRR5602633	Embryo	PRJNA388055	3174272
	SRR5602630	Embryo	PRJNA388055	2341946
	SRR8587127	Embryo	PRJNA522975	672178
	SRR8587128	Embryo	PRJNA522975	1023558
	SRR8587129	Embryo	PRJNA522975	769474
	SRR8587130	Embryo	PRJNA522975	1848002
	SRR8587132	Embryo	PRJNA522975	1010602
	SRR8587134	Embryo	PRJNA522975	970724
	SRR8587136	Embryo	PRJNA522975	774234
	SRR5575800	Embryo	PRJNA387179	2014844
	SRR5575801	Embryo	PRJNA387179	2166302
	SRR5575802	Embryo	PRJNA387179	2077606
	SRR5575803	Embryo	PRJNA387179	1372956
	SRR5575804	Embryo	PRJNA387179	1896310
	SRR5575805	Embryo	PRJNA387179	1343626
	SRR7179551	Embryo	PRJNA471880	931442
	SRR7179552	Embryo	PRJNA471880	1421564
	SRR7179553	Embryo	PRJNA471880	682164
	SRR7179545	Embryo	PRJNA471880	457542
	SRR7179546	Embryo	PRJNA471880	1194906
	SRR7179547	Embryo	PRJNA471880	377176
	SRR7179548	Embryo	PRJNA471880	381092
	SRR7179549	Embryo	PRJNA471880	4305088
	SRR7179550	Embryo	PRJNA471880	5650998
	SRR3105390	Endometrial_stromal_cell	PRJNA309050	146346
	SRR3105445	Endometrial_stromal_cell	PRJNA309050	215574
	SRR3105448	Endometrial_stromal_cell	PRJNA309050	93852
	SRR3105449	Endometrial_stromal_cell	PRJNA309050	246612
	SRR3105453	Endometrial_stromal_cell	PRJNA309050	187650
	SRR3105460	Endometrial_stromal_cell	PRJNA309050	207094
	SRR2048584	Endometrium	PRJNA285675	999114
	SRR2048590	Endometrium	PRJNA285675	1031786
	SRR2048593	Endometrium	PRJNA285675	1020390
	SRR2659943	Endometrium	PRJNA298914	999114
	SRR2659949	Endometrium	PRJNA298914	955318
	SRR2659951	Endometrium	PRJNA298914	1373820
	SRS1051927	Endometrium	PRJNA294306	314970
	SRS1051924	Endometrium	PRJNA294306	199074
	SRR3505350	Endometrium	PRJNA321608	3657906
	SRR3505351	Endometrium	PRJNA321608	3067138
	SRR3505353	Endometrium	PRJNA321608	3620482
	SRR3505355	Endometrium	PRJNA321608	747120
	SRR3505357	Endometrium	PRJNA321608	3515240
	SRR3505358	Endometrium	PRJNA321608	5374598
	SRR3505359	Endometrium	PRJNA321608	807116
	SRR3505360	Endometrium	PRJNA321608	4752844
	SRR3505361	Endometrium	PRJNA321608	3011724
	SRR3505362	Endometrium	PRJNA321608	825848
	SRR3505363	Endometrium	PRJNA321608	4367112
	SRR3505364	Endometrium	PRJNA321608	787472
	SRR1051339	Epiblast_elongated_along_the_AnteriortoPosterior_axis_(APE)_cells	PRJNA231898	164570
	SRR1051334	Epithelial_Radially_Symmetric_Epiblast_(ERSE)_cells	PRJNA231898	1741270
	SRR1051335	Epithelial_Radially_Symmetric_Epiblast_(ERSE)_cells	PRJNA231898	585686
	SRR1051336	Epithelial_Radially_Symmetric_Epiblast_(ERSE)_cells	PRJNA231898	2621242
	SRR8239482	Epithelial_tissue	PRJNA506703	1911684
	SRR8239483	Epithelial_tissue	PRJNA506703	1433784
	SRR8239484	Epithelial_tissue	PRJNA506703	1782782
	SRR8239485	Epithelial_tissue	PRJNA506703	1721732
	SRR8239486	Epithelial_tissue	PRJNA506703	7106206
	SRR8239487	Epithelial_tissue	PRJNA506703	996650
	SRR1767626	Fat	PRJNA273164	248552
	SRR1767630	Fat	PRJNA273164	204248
	SRR1767638	Fat	PRJNA273164	424710
	SRR1767642	Fat	PRJNA273164	116264
	SRR1767646	Fat	PRJNA273164	494824
	SRR1767650	Fat	PRJNA273164	108676
	SRR1767654	Fat	PRJNA273164	126704
	SRR1767658	Fat	PRJNA273164	361022
	SRR526996	Fat	PRJNA171257	87868
	SRR527000	Fat	PRJNA171257	129162
	SRR527004	Fat	PRJNA171257	153624
	SRR527012	Fat	PRJNA171257	167666
	SRR527016	Fat	PRJNA171257	145740
	SRR527020	Fat	PRJNA171257	139122
	SRR527023	Fat	PRJNA171257	160418
	SRR527027	Fat	PRJNA171257	133616
	SRR3234264	Fat	PRJNA315560	444822
	SRR3234265	Fat	PRJNA315560	449686
	SRR3234266	Fat	PRJNA315560	1076930
	SRR3234267	Fat	PRJNA315560	509666
	SRR3234268	Fat	PRJNA315560	558192
	SRR3234269	Fat	PRJNA315560	1705768
	SRR3234270	Fat	PRJNA315560	642866
	SRR3234271	Fat	PRJNA315560	519670
	SRR3234273	Fat	PRJNA315560	840946
	SRR3234274	Fat	PRJNA315560	650418
	SRR3234275	Fat	PRJNA315560	798734
	SRR3234276	Fat	PRJNA315560	1411552
	SRR3234277	Fat	PRJNA315560	367136
	SRR3234278	Fat	PRJNA315560	964990
	SRR3234279	Fat	PRJNA315560	588622
	SRR3234280	Fat	PRJNA315560	809414
	SRR3234281	Fat	PRJNA315560	682956
	SRR3234282	Fat	PRJNA315560	869624
	SRR3234283	Fat	PRJNA315560	930380
	SRR3234285	Fat	PRJNA315560	211796
	SRR3234286	Fat	PRJNA315560	1749174
	SRR3234287	Fat	PRJNA315560	948740
	SRR3234288	Fat	PRJNA315560	1444778
	SRR3234290	Fat	PRJNA315560	419462
	SRR3234292	Fat	PRJNA315560	1253304
	SRR3234293	Fat	PRJNA315560	1230238
	SRR3234295	Fat	PRJNA315560	618666
	SRR3234296	Fat	PRJNA315560	478004
	SRR526997	Fat	PRJNA171257	161852
	SRR527001	Fat	PRJNA171257	129848
	SRR527005	Fat	PRJNA171257	123506
	SRR527013	Fat	PRJNA171257	143804
	SRR527024	Fat	PRJNA171257	141346
	SRR527028	Fat	PRJNA171257	157380
	SRS2990516	FBHE_cell	PRJNA434353	1694136
	SRS1051925	Gall_Bladder	PRJNA294306	195414
	SRR5231245	Granulosa_cells	PRJNA371462	1340634
	SRR5231246	Granulosa_cells	PRJNA371462	1611458
	SRR5231247	Granulosa_cells	PRJNA371462	2302462
	SRR5231248	Granulosa_cells	PRJNA371462	1947778
	SRR5231250	Granulosa_cells	PRJNA371462	2181594
	SRR5231251	Granulosa_cells	PRJNA371462	2309078
	SRR5231253	Granulosa_cells	PRJNA371462	1757762
	SRR5231254	Granulosa_cells	PRJNA371462	1676056
	SRR5231255	Granulosa_cells	PRJNA371462	1932704
	SRR5231256	Granulosa_cells	PRJNA371462	1810680
	SRR5231257	Granulosa_cells	PRJNA371462	1937744
	SRR5231258	Granulosa_cells	PRJNA371462	2090868
	SRR5231259	Granulosa_cells	PRJNA371462	727602
	SRR5231260	Granulosa_cells	PRJNA371462	1047440
	SRR5231261	Granulosa_cells	PRJNA371462	1505818
	SRR5231262	Granulosa_cells	PRJNA371462	1942308
	SRR5231263	Granulosa_cells	PRJNA371462	1698976
	SRR5231264	Granulosa_cells	PRJNA371462	2296388
	SRR5231265	Granulosa_cells	PRJNA371462	1614750
	SRR5231267	Granulosa_cells	PRJNA371462	1192530
	SRR8085102	Granulosa_cells	PRJNA497853	6199240
	SRR8085103	Granulosa_cells	PRJNA497853	5506604
	SRR8085104	Granulosa_cells	PRJNA497853	6454858
	SRR8085105	Granulosa_cells	PRJNA497853	4983148
	SRR8085106	Granulosa_cells	PRJNA497853	4345042
	SRR8085107	Granulosa_cells	PRJNA497853	6523738
	SRR8085108	Granulosa_cells	PRJNA497853	4998048
	SRR3109702	Heart	PRJNA309284	272380
	SRR3109703	Heart	PRJNA309284	513068
	SRR3109704	Heart	PRJNA309284	746180
	SRR594475	Heart	PRJNA177791	965630
	SRS1051929	Heart	PRJNA294306	323982
	SRR2829357	Ileal	PRJNA300273	357768
	SRR2829358	Ileal	PRJNA300273	351694
	SRR2829360	Ileal	PRJNA300273	387450
	SRR2829361	Ileal	PRJNA300273	359182
	SRR2829364	Ileal	PRJNA300273	315784
	SRR2829365	Ileal	PRJNA300273	353850
	SRR2829366	Ileal	PRJNA300273	397284
	SRR2862499	Ileal	PRJNA300570	465750
	SRR2862500	Ileal	PRJNA300570	407874
	SRR2862502	Ileal	PRJNA300570	567180
	SRR2862503	Ileal	PRJNA300570	372658
	SRR2862504	Ileal	PRJNA300570	348642
	SRR2862506	Ileal	PRJNA300570	408006
	SRR2862507	Ileal	PRJNA300570	422596
	SRR2862508	Ileal	PRJNA300570	438726
	SRR2862509	Ileal	PRJNA300570	378464
	SRR2862510	Ileal	PRJNA300570	447798
	SRR2862512	Ileal	PRJNA300570	361754
	SRR2862515	Ileal	PRJNA300570	433330
	SRR2862517	Ileal	PRJNA300570	403344
	SRR2862518	Ileal	PRJNA300570	396324
	SRR2862519	Ileal	PRJNA300570	500454
	SRR2777573	Ileum	PRJNA299685	436032
	SRR2777576	Ileum	PRJNA299685	573310
	SRR2777579	Ileum	PRJNA299685	495894
	SRR2777580	Ileum	PRJNA299685	610202
	SRR2777583	Ileum	PRJNA299685	379000
	SRR2777584	Ileum	PRJNA299685	402114
	SRR2777586	Ileum	PRJNA299685	580802
	SRR2777590	Ileum	PRJNA299685	537578
	SRR5990194	Ileum	PRJNA400067	1391384
	SRR5990195	Ileum	PRJNA400067	1045206
	SRR5990196	Ileum	PRJNA400067	1525518
	SRR5990197	Ileum	PRJNA400067	1420604
	SRR5990208	Ileum	PRJNA400067	1320112
	SRR5990209	Ileum	PRJNA400067	772424
	SRR5990212	Ileum	PRJNA400067	2132930
	SRR5990213	Ileum	PRJNA400067	1753186
	SRR5990216	Ileum	PRJNA400067	1291080
	SRR5990217	Ileum	PRJNA400067	1105484
	SRS1051920	Ileum	PRJNA294306	437598
	SRR2777556	Jejunum	PRJNA299685	421668
	SRR2777557	Jejunum	PRJNA299685	586574
	SRR2777558	Jejunum	PRJNA299685	494318
	SRR2777559	Jejunum	PRJNA299685	1085610
	SRR2777560	Jejunum	PRJNA299685	1222704
	SRR2777563	Jejunum	PRJNA299685	395964
	SRR2777564	Jejunum	PRJNA299685	441016
	SRR2777565	Jejunum	PRJNA299685	683714
	SRR2777566	Jejunum	PRJNA299685	701394
	SRR2777567	Jejunum	PRJNA299685	595148
	SRR2777568	Jejunum	PRJNA299685	867160
	SRR2777569	Jejunum	PRJNA299685	500534
	SRR2777572	Jejunum	PRJNA299685	844100
	SRR4010614	Jejunum	PRJNA338058	3433718
	SRR4010620	Jejunum	PRJNA338058	4686528
	SRR4010632	Jejunum	PRJNA338058	3517168
	SRR4010638	Jejunum	PRJNA338058	7343282
	SRR4010644	Jejunum	PRJNA338058	6746562
	SRR4010662	Jejunum	PRJNA338058	8849712
	SRR4010668	Jejunum	PRJNA338058	2314452
	SRS1051917	Jejunum	PRJNA294306	869960
	ERR2244307	Jejunum	PRJEB24380	146166
	ERR2244313	Jejunum	PRJEB24380	266106
	ERR2244314	Jejunum	PRJEB24380	296402
	ERR2244315	Jejunum	PRJEB24380	436728
	ERR2244316	Jejunum	PRJEB24380	251214
	ERR2244317	Jejunum	PRJEB24380	265942
	SRR3109708	Kidney	PRJNA309284	502100
	SRR3109709	Kidney	PRJNA309284	480508
	SRR3109710	Kidney	PRJNA309284	508178
	SRR594476	Kidney	PRJNA177791	1501952
	SRR7630419	Kidney	PRJNA483811	489386
	SRR7630420	Kidney	PRJNA483811	545196
	SRR7630421	Kidney	PRJNA483811	414000
	SRS1051930	Kidney	PRJNA294306	410832
	ERR1331690	Liver	PRJEB13074	1362558
	ERR1331691	Liver	PRJEB13074	3751354
	ERR2664182	Liver	PRJEB27455	1833430
	ERR2664183	Liver	PRJEB27455	1918632
	ERR2664184	Liver	PRJEB27455	3006012
	ERR2664185	Liver	PRJEB27455	1934538
	SRR1607558	Liver	PRJNA263327	273340
	SRR1607559	Liver	PRJNA263327	213272
	SRR1607570	Liver	PRJNA263327	342372
	SRR1607571	Liver	PRJNA263327	380844
	SRR1607572	Liver	PRJNA263327	471254
	SRR1607573	Liver	PRJNA263327	155740
	SRR1607574	Liver	PRJNA263327	282458
	SRR1607575	Liver	PRJNA263327	175700
	SRR1607576	Liver	PRJNA263327	147006
	SRR1607577	Liver	PRJNA263327	339150
	SRR1607578	Liver	PRJNA263327	150320
	SRR1607579	Liver	PRJNA263327	191180
	SRR1607580	Liver	PRJNA263327	143810
	SRR1607581	Liver	PRJNA263327	227794
	SRR1607582	Liver	PRJNA263327	315230
	SRR1607583	Liver	PRJNA263327	191240
	SRR1607584	Liver	PRJNA263327	375530
	SRR1607585	Liver	PRJNA263327	162006
	SRR1607586	Liver	PRJNA263327	442256
	SRR1607588	Liver	PRJNA263327	121310
	SRR1607589	Liver	PRJNA263327	128182
	SRR1607590	Liver	PRJNA263327	154100
	SRR1607591	Liver	PRJNA263327	161710
	SRR1607592	Liver	PRJNA263327	177062
	SRR1607593	Liver	PRJNA263327	368440
	SRR1607594	Liver	PRJNA263327	310746
	SRR1607595	Liver	PRJNA263327	348938
	SRR1607596	Liver	PRJNA263327	399916
	SRR1607597	Liver	PRJNA263327	289724
	SRR1607598	Liver	PRJNA263327	72406
	SRR1607599	Liver	PRJNA263327	469238
	SRR1607600	Liver	PRJNA263327	89204
	SRR1607601	Liver	PRJNA263327	463808
	SRR1607602	Liver	PRJNA263327	558540
	SRR1607603	Liver	PRJNA263327	349180
	SRR1607604	Liver	PRJNA263327	48600
	SRR1607605	Liver	PRJNA263327	384970
	SRR1767621	Liver	PRJNA273164	390098
	SRR1767625	Liver	PRJNA273164	228454
	SRR1767629	Liver	PRJNA273164	267694
	SRR1767633	Liver	PRJNA273164	149522
	SRR1767637	Liver	PRJNA273164	161332
	SRR1767641	Liver	PRJNA273164	105988
	SRR1767649	Liver	PRJNA273164	123860
	SRR1767653	Liver	PRJNA273164	326762
	SRR1767657	Liver	PRJNA273164	220944
	SRR2952617	Liver	PRJNA303131	1110284
	SRR2952618	Liver	PRJNA303131	594166
	SRR2952619	Liver	PRJNA303131	484884
	SRR2952620	Liver	PRJNA303131	374680
	SRR2952621	Liver	PRJNA303131	889022
	SRR2952627	Liver	PRJNA303131	430076
	SRR2952630	Liver	PRJNA303131	325634
	SRR2952632	Liver	PRJNA303131	288520
	SRR2952633	Liver	PRJNA303131	327270
	SRR2952634	Liver	PRJNA303131	339062
	SRR2952778	Liver	PRJNA303144	2548230
	SRR2960002	Liver	PRJNA304027	1161262
	SRR2960003	Liver	PRJNA304027	794562
	SRR2960004	Liver	PRJNA304027	850122
	SRR2960005	Liver	PRJNA304027	1355376
	SRR2960006	Liver	PRJNA304027	958450
	SRR2960007	Liver	PRJNA304027	970984
	SRR2960008	Liver	PRJNA304027	1142142
	SRR2960009	Liver	PRJNA304027	1039612
	SRR2960010	Liver	PRJNA304027	864442
	SRR2960011	Liver	PRJNA304027	1161138
	SRR2960012	Liver	PRJNA304027	1127672
	SRR2960013	Liver	PRJNA304027	933658
	SRR2960014	Liver	PRJNA304027	1038776
	SRR2960015	Liver	PRJNA304027	1034558
	SRR2960017	Liver	PRJNA304027	1199146
	SRR2960018	Liver	PRJNA304027	967574
	SRR2985027	Liver	PRJNA303144	1953720
	SRR2985029	Liver	PRJNA303144	1130434
	SRR2985030	Liver	PRJNA303144	1609728
	SRR2985031	Liver	PRJNA303144	1810158
	SRR2985033	Liver	PRJNA303144	580402
	SRR2985035	Liver	PRJNA303144	1651644
	SRR2985036	Liver	PRJNA303144	1739016
	SRR2985037	Liver	PRJNA303144	1055920
	SRR3109705	Liver	PRJNA309284	495304
	SRR3109706	Liver	PRJNA309284	610666
	SRR3109707	Liver	PRJNA309284	510202
	SRR5110605	Liver	PRJNA357463	2357090
	SRR5110606	Liver	PRJNA357463	2400736
	SRR5110607	Liver	PRJNA357463	2233258
	SRR5110608	Liver	PRJNA357463	2212102
	SRR5110609	Liver	PRJNA357463	2488732
	SRR5110610	Liver	PRJNA357463	1969222
	SRR5110611	Liver	PRJNA357463	2518784
	SRR5110612	Liver	PRJNA357463	2067974
	SRR5110613	Liver	PRJNA357463	2524208
	SRR5110614	Liver	PRJNA357463	2502302
	SRR5110615	Liver	PRJNA357463	2269492
	SRR5110616	Liver	PRJNA357463	2495588
	SRR5110617	Liver	PRJNA357463	1890004
	SRR5110618	Liver	PRJNA357463	2122236
	SRR5110619	Liver	PRJNA357463	1862360
	SRR5110621	Liver	PRJNA357463	2035436
	SRR5110622	Liver	PRJNA357463	2026494
	SRR5110623	Liver	PRJNA357463	3070608
	SRR5110624	Liver	PRJNA357463	2238942
	SRR5110625	Liver	PRJNA357463	1837974
	SRR5110626	Liver	PRJNA357463	2250724
	SRR5110627	Liver	PRJNA357463	2053188
	SRR5110628	Liver	PRJNA357463	2420962
	SRR5110629	Liver	PRJNA357463	2305446
	SRR5110631	Liver	PRJNA357463	2108076
	SRR5110632	Liver	PRJNA357463	4850948
	SRR5110633	Liver	PRJNA357463	1978290
	SRR5110634	Liver	PRJNA357463	2400144
	SRR5110636	Liver	PRJNA357463	2955218
	SRR5110637	Liver	PRJNA357463	1643080
	SRR5110638	Liver	PRJNA357463	1348506
	SRR5110639	Liver	PRJNA357463	2549694
	SRR5110640	Liver	PRJNA357463	2198676
	SRR5110641	Liver	PRJNA357463	2077380
	SRR5110642	Liver	PRJNA357463	2389864
	SRR5802935	Liver	PRJNA392196	142502
	SRR5802937	Liver	PRJNA392196	1346052
	SRR5802939	Liver	PRJNA392196	153334
	SRR5802941	Liver	PRJNA392196	335768
	SRR5802943	Liver	PRJNA392196	238228
	SRR5802944	Liver	PRJNA392196	777218
	SRR5802946	Liver	PRJNA392196	590744
	SRR5802948	Liver	PRJNA392196	298326
	SRR5802950	Liver	PRJNA392196	200854
	SRR5802952	Liver	PRJNA392196	500072
	SRR5802955	Liver	PRJNA392196	443382
	SRR5802961	Liver	PRJNA392196	754148
	SRR5802963	Liver	PRJNA392196	316564
	SRR5802965	Liver	PRJNA392196	464760
	SRR5802971	Liver	PRJNA392196	1744238
	SRR5813866	Liver	PRJNA393239	835502
	SRR5813941	Liver	PRJNA393239	574990
	SRR594477	Liver	PRJNA177791	1814824
	SRR8505911	Liver	PRJNA517791	701290
	SRR8505912	Liver	PRJNA517791	773282
	SRR8505913	Liver	PRJNA517791	980562
	SRR8505914	Liver	PRJNA517791	878468
	SRR8505915	Liver	PRJNA517791	765152
	SRR8505916	Liver	PRJNA517791	722950
	SRR8614208	Liver	PRJNA522422	294102
	SRR8614232	Liver	PRJNA522422	382590
	SRR8614235	Liver	PRJNA522422	370888
	SRR8614238	Liver	PRJNA522422	353036
	SRR8614302	Liver	PRJNA522422	355272
	SRR8614304	Liver	PRJNA522422	461192
	SRR8614305	Liver	PRJNA522422	560668
	SRR8614306	Liver	PRJNA522422	541988
	SRR8614307	Liver	PRJNA522422	299514
	SRR8614309	Liver	PRJNA522422	557792
	SRR8614311	Liver	PRJNA522422	408024
	SRR8614312	Liver	PRJNA522422	704366
	SRR8614330	Liver	PRJNA522422	574490
	SRR8614349	Liver	PRJNA522422	463482
	SRR8614437	Liver	PRJNA522422	285416
	SRR8614440	Liver	PRJNA522422	385862
	SRR8614444	Liver	PRJNA522422	700804
	SRR8614445	Liver	PRJNA522422	1081216
	SRR8614588	Liver	PRJNA522422	1531656
	SRR8614589	Liver	PRJNA522422	2195620
	SRR8614592	Liver	PRJNA522422	637958
	SRR8614593	Liver	PRJNA522422	407708
	SRR8614594	Liver	PRJNA522422	516670
	SRR8614596	Liver	PRJNA522422	466850
	SRR8614597	Liver	PRJNA522422	1191134
	SRR8614602	Liver	PRJNA522422	2387282
	SRR8614779	Liver	PRJNA522422	776962
	SRR8614781	Liver	PRJNA522422	1330686
	SRR8614783	Liver	PRJNA522422	543510
	SRR8614796	Liver	PRJNA522422	282032
	SRR8614798	Liver	PRJNA522422	511684
	SRR8614800	Liver	PRJNA522422	479078
	SRR8614802	Liver	PRJNA522422	424242
	SRR8614805	Liver	PRJNA522422	326116
	SRR8614806	Liver	PRJNA522422	2168872
	SRR8614808	Liver	PRJNA522422	750550
	SRS1051928	Liver	PRJNA294306	164586
	SRS2308438	Liver	PRJNA391214	2865934
	SRS2308439	Liver	PRJNA391214	5501970
	SRS2308440	Liver	PRJNA391214	4419046
	SRS4394630	Liver	PRJNA522422	581974
	SRS4394640	Liver	PRJNA522422	602698
	SRS4394684	Liver	PRJNA522422	619176
	SRS4394685	Liver	PRJNA522422	584324
	SRS4394702	Liver	PRJNA522422	1003890
	SRS4394705	Liver	PRJNA522422	1271960
	SRS4394719	Liver	PRJNA522422	596462
	SRS4394720	Liver	PRJNA522422	762960
	SRS4394729	Liver	PRJNA522422	1026960
	SRS4394740	Liver	PRJNA522422	601450
	SRS4394747	Liver	PRJNA522422	919266
	SRS4394753	Liver	PRJNA522422	753516
	SRS4394754	Liver	PRJNA522422	751630
	SRS4394774	Liver	PRJNA522422	600052
	SRS4394814	Liver	PRJNA522422	740314
	SRS4394823	Liver	PRJNA522422	657118
	SRS4394832	Liver	PRJNA522422	1079110
	SRS4394834	Liver	PRJNA522422	702990
	SRS4394851	Liver	PRJNA522422	932022
	SRS4394858	Liver	PRJNA522422	649720
	SRS4394913	Liver	PRJNA522422	844754
	SRS4394917	Liver	PRJNA522422	705030
	SRS4394922	Liver	PRJNA522422	584626
	SRS4394928	Liver	PRJNA522422	742884
	SRS625407	Liver	PRJNA251439	3912482
	SRR5118367	Lung	PRJNA200354	409124
	SRR5190376	Lung	PRJNA362606	369678
	SRR5190378	Lung	PRJNA362606	636332
	SRR5190380	Lung	PRJNA362606	458362
	SRR594478	Lung	PRJNA177791	1323128
	SRS1072483	Lung	PRJNA272725	1023092
	SRS1072484	Lung	PRJNA272725	774096
	SRS1072488	Lung	PRJNA272725	813478
	SRS1072489	Lung	PRJNA272725	870028
	SRS1072493	Lung	PRJNA272725	693610
	SRS1072494	Lung	PRJNA272725	841618
	SRS1072498	Lung	PRJNA272725	699252
	SRS1072499	Lung	PRJNA272725	689756
	SRS1072503	Lung	PRJNA272725	587592
	SRS1072504	Lung	PRJNA272725	701564
	SRS1072508	Lung	PRJNA272725	595184
	SRS1072513	Lung	PRJNA272725	396092
	SRS1072514	Lung	PRJNA272725	911874
	SRS1072518	Lung	PRJNA272725	820148
	SRS1072519	Lung	PRJNA272725	718324
	SRS1072523	Lung	PRJNA272725	718338
	SRS1072524	Lung	PRJNA272725	971336
	SRS1072528	Lung	PRJNA272725	685218
	SRS1072529	Lung	PRJNA272725	721476
	SRS1072533	Lung	PRJNA272725	1181342
	SRS1072534	Lung	PRJNA272725	528120
	SRS1072538	Lung	PRJNA272725	723652
	SRS1072539	Lung	PRJNA272725	708236
	SRS1072543	Lung	PRJNA272725	917882
	SRS1072544	Lung	PRJNA272725	1106404
	SRS1072548	Lung	PRJNA272725	632284
	SRS1072549	Lung	PRJNA272725	765100
	SRS1072552	Lung	PRJNA272725	680662
	SRS1072554	Lung	PRJNA272725	500058
	SRS1072558	Lung	PRJNA272725	1172818
	SRS1072559	Lung	PRJNA272725	621150
	SRS1072563	Lung	PRJNA272725	710256
	SRS1072568	Lung	PRJNA272725	1275518
	SRS1072569	Lung	PRJNA272725	759246
	SRS1072573	Lung	PRJNA272725	933490
	SRS1072578	Lung	PRJNA272725	753992
	SRS1072579	Lung	PRJNA272725	769706
	SRS1072583	Lung	PRJNA272725	653950
	SRS1072584	Lung	PRJNA272725	796326
	SRS1072588	Lung	PRJNA272725	799560
	SRS1072589	Lung	PRJNA272725	774094
	SRS1072593	Lung	PRJNA272725	465506
	SRS1072594	Lung	PRJNA272725	687334
	SRS4394623	Lung	PRJNA522422	909656
	SRS4394641	Lung	PRJNA522422	830574
	SRS4394664	Lung	PRJNA522422	1971310
	SRS4394666	Lung	PRJNA522422	740446
	SRS4394673	Lung	PRJNA522422	814984
	SRS4394679	Lung	PRJNA522422	1075490
	SRS4394680	Lung	PRJNA522422	869064
	SRS4394769	Lung	PRJNA522422	662760
	SRS4394771	Lung	PRJNA522422	110996
	SRS4394778	Lung	PRJNA522422	647988
	SRS4394780	Lung	PRJNA522422	429430
	SRS4394795	Lung	PRJNA522422	802500
	SRS4394821	Lung	PRJNA522422	772888
	SRS4394860	Lung	PRJNA522422	728116
	SRS4394864	Lung	PRJNA522422	738802
	SRS4394873	Lung	PRJNA522422	799792
	SRS4394893	Lung	PRJNA522422	1418862
	SRS4394914	Lung	PRJNA522422	850590
	SRS4394920	Lung	PRJNA522422	1007420
	SRS1051933	Lymph_Nodes	PRJNA294306	424522
	SRR2960019	MAC-T_cell	PRJNA304027	898764
	SRR2960020	MAC-T_cell	PRJNA304027	1367164
	SRR2960021	MAC-T_cell	PRJNA304027	1722550
	SRR2960022	MAC-T_cell	PRJNA304027	1570788
	SRR2960023	MAC-T_cell	PRJNA304027	1691022
	SRR2960026	MAC-T_cell	PRJNA304027	1869944
	SRR2960027	MAC-T_cell	PRJNA304027	1146554
	SRR2960028	MAC-T_cell	PRJNA304027	1132606
	SRR2960029	MAC-T_cell	PRJNA304027	910188
	SRR2960030	MAC-T_cell	PRJNA304027	1652122
	SRR2960031	MAC-T_cell	PRJNA304027	1721858
	SRR2960032	MAC-T_cell	PRJNA304027	1421522
	SRR2960033	MAC-T_cell	PRJNA304027	2308840
	SRR2960035	MAC-T_cell	PRJNA304027	1818948
	SRR2960036	MAC-T_cell	PRJNA304027	1213878
	SRR9856941	MAC-T_cell	PRJNA556769	1733710
	SRR10031488	MadinDarby_Bovine_Kidney_cell	PRJNA562724	1086466
	SRR10031489	MadinDarby_Bovine_Kidney_cell	PRJNA562724	1347478
	SRR10031490	MadinDarby_Bovine_Kidney_cell	PRJNA562724	1088326
	SRR10031491	MadinDarby_Bovine_Kidney_cell	PRJNA562724	1353218
	SRR10031492	MadinDarby_Bovine_Kidney_cell	PRJNA562724	1130750
	SRR10031493	MadinDarby_Bovine_Kidney_cell	PRJNA562724	1194890
	SRR10031494	MadinDarby_Bovine_Kidney_cell	PRJNA562724	1152938
	SRR10031495	MadinDarby_Bovine_Kidney_cell	PRJNA562724	1351700
	SRR10031496	MadinDarby_Bovine_Kidney_cell	PRJNA562724	1338952
	SRR10031497	MadinDarby_Bovine_Kidney_cell	PRJNA562724	1054602
	SRR10031499	MadinDarby_Bovine_Kidney_cell	PRJNA562724	1164966
	SRR10031500	MadinDarby_Bovine_Kidney_cell	PRJNA562724	1215146
	SRR10031501	MadinDarby_Bovine_Kidney_cell	PRJNA562724	1212948
	SRR10031502	MadinDarby_Bovine_Kidney_cell	PRJNA562724	1430842
	SRR5040193	MadinDarby_Bovine_Kidney_cell	PRJNA354424	1002820
	SRR5040194	MadinDarby_Bovine_Kidney_cell	PRJNA354424	1027118
	SRR5040195	MadinDarby_Bovine_Kidney_cell	PRJNA354424	1308658
	SRR9623129	MadinDarby_Bovine_Kidney_cell	PRJNA552044	489386
	SRR9623128	MadinDarby_Bovine_Kidney_cell	PRJNA552044	545196
	SRR9644281	Mammary_epithelial_cells	PRJNA552678	923062
	SRR9644282	Mammary_epithelial_cells	PRJNA552678	1034584
	SRR9644283	Mammary_epithelial_cells	PRJNA552678	1068656
	SRR9644284	Mammary_epithelial_cells	PRJNA552678	1132266
	SRR9644285	Mammary_epithelial_cells	PRJNA552678	845900
	SRR9644286	Mammary_epithelial_cells	PRJNA552678	961600
	SRR2960163	Mammary_gland	PRJNA301774	1042124
	SRR2960164	Mammary_gland	PRJNA301774	899986
	SRR2960165	Mammary_gland	PRJNA301774	1227202
	SRR2960166	Mammary_gland	PRJNA301774	1139512
	SRR2960169	Mammary_gland	PRJNA301774	1024464
	SRR2960170	Mammary_gland	PRJNA301774	1194306
	SRR2960171	Mammary_gland	PRJNA301774	1106268
	SRR2960172	Mammary_gland	PRJNA301774	1144616
	SRR2960173	Mammary_gland	PRJNA301774	1001448
	SRR2960175	Mammary_gland	PRJNA301774	1359872
	SRR2960176	Mammary_gland	PRJNA301774	1257836
	SRR2960177	Mammary_gland	PRJNA301774	1123610
	SRR2960179	Mammary_gland	PRJNA301774	1071754
	SRR2960180	Mammary_gland	PRJNA301774	1372750
	SRR2960181	Mammary_gland	PRJNA301774	1182904
	SRR2960183	Mammary_gland	PRJNA301774	1147468
	SRR2960184	Mammary_gland	PRJNA301774	1355378
	SRR2960185	Mammary_gland	PRJNA301774	981846
	SRR2960187	Mammary_gland	PRJNA301774	912622
	SRR2960188	Mammary_gland	PRJNA301774	1422324
	SRR2960189	Mammary_gland	PRJNA301774	991078
	SRR2960190	Mammary_gland	PRJNA301774	928930
	SRR2960192	Mammary_gland	PRJNA301774	1129246
	SRR2960193	Mammary_gland	PRJNA301774	1044582
	SRR2960194	Mammary_gland	PRJNA301774	806584
	SRR2960195	Mammary_gland	PRJNA301774	1116652
	SRR2960197	Mammary_gland	PRJNA301774	902458
	SRR3402630	Mammary_gland	PRJNA318751	761372
	SRR3402682	Mammary_gland	PRJNA318751	780324
	SRR3402767	Mammary_gland	PRJNA318751	776854
	SRR6912078	Mammary_gland	PRJNA446068	347120
	SRR6912079	Mammary_gland	PRJNA446068	212428
	SRR6912080	Mammary_gland	PRJNA446068	502278
	SRR6912081	Mammary_gland	PRJNA446068	289424
	SRR6912082	Mammary_gland	PRJNA446068	464008
	SRR6912083	Mammary_gland	PRJNA446068	293824
	SRR6912084	Mammary_gland	PRJNA446068	862644
	SRR6912085	Mammary_gland	PRJNA446068	606560
	SRS1179731	Mammary_gland	PRJNA301774	2311212
	SRS1401130	Mammary_gland	PRJNA318751	643790
	ERR2985659	Mammary_gland	PRJEB30263	620928
	ERR2987284	Mammary_gland	PRJEB30263	785152
	ERR2987286	Mammary_gland	PRJEB30263	767622
	ERR2987287	Mammary_gland	PRJEB30263	911870
	ERR2987288	Mammary_gland	PRJEB30263	899226
	ERR2987290	Mammary_gland	PRJEB30263	1602978
	ERR2987291	Mammary_gland	PRJEB30263	753480
	ERR2987298	Mammary_gland	PRJEB30263	440988
	ERR2987299	Mammary_gland	PRJEB30263	619140
	ERR2987300	Mammary_gland	PRJEB30263	681236
	SRS4394637	Median_Emminence_Hypothalamus	PRJNA522422	450172
	SRS4394644	Median_Emminence_Hypothalamus	PRJNA522422	496634
	SRS4394671	Median_Emminence_Hypothalamus	PRJNA522422	601862
	SRS4394683	Median_Emminence_Hypothalamus	PRJNA522422	857698
	SRS4394689	Median_Emminence_Hypothalamus	PRJNA522422	464690
	SRS4394703	Median_Emminence_Hypothalamus	PRJNA522422	440970
	SRS4394706	Median_Emminence_Hypothalamus	PRJNA522422	656320
	SRS4394707	Median_Emminence_Hypothalamus	PRJNA522422	531572
	SRS4394723	Median_Emminence_Hypothalamus	PRJNA522422	1106978
	SRS4394728	Median_Emminence_Hypothalamus	PRJNA522422	486392
	SRS4394736	Median_Emminence_Hypothalamus	PRJNA522422	492478
	SRS4394749	Median_Emminence_Hypothalamus	PRJNA522422	588986
	SRS4394773	Median_Emminence_Hypothalamus	PRJNA522422	129840
	SRS4394783	Median_Emminence_Hypothalamus	PRJNA522422	656356
	SRS4394804	Median_Emminence_Hypothalamus	PRJNA522422	540336
	SRS4394812	Median_Emminence_Hypothalamus	PRJNA522422	712750
	SRS4394824	Median_Emminence_Hypothalamus	PRJNA522422	494742
	SRS4394867	Median_Emminence_Hypothalamus	PRJNA522422	453816
	SRS4394887	Median_Emminence_Hypothalamus	PRJNA522422	130394
	SRS4394932	Median_Emminence_Hypothalamus	PRJNA522422	127246
	SRR8209436	Melatonin_oocyte	PRJNA506215	1145028
	SRR2777538	Midjejunum	PRJNA299685	579610
	SRR2777539	Midjejunum	PRJNA299685	736128
	SRR2777540	Midjejunum	PRJNA299685	360452
	SRR2777542	Midjejunum	PRJNA299685	609484
	SRR2777544	Midjejunum	PRJNA299685	830628
	SRR2777545	Midjejunum	PRJNA299685	519076
	SRR2777549	Midjejunum	PRJNA299685	602108
	SRR2777550	Midjejunum	PRJNA299685	676338
	SRR2777554	Midjejunum	PRJNA299685	713824
	SRR2777555	Midjejunum	PRJNA299685	947452
	SRS1111854	Milk	PRJNA298446	1356608
	SRS1111999	Milk	PRJNA298446	1695012
	SRS1112102	Milk	PRJNA298446	1498760
	SRS1112121	Milk	PRJNA298446	800900
	SRR4408786	Milk	PRJNA305942	5892952
	SRR4408788	Milk	PRJNA305942	4753198
	SRR4408814	Milk	PRJNA305942	5311974
	SRR4408880	Milk	PRJNA305942	4593726
	SRR4408936	Milk	PRJNA305942	1546262
	SRR4408947	Milk	PRJNA305942	3928608
	SRR4408953	Milk	PRJNA305942	5457214
	SRR4408954	Milk	PRJNA305942	5965548
	SRR4408955	Milk	PRJNA305942	5031844
	SRR4408956	Milk	PRJNA305942	4351094
	SRR4408959	Milk	PRJNA305942	4287336
	SRR4408960	Milk	PRJNA305942	5854360
	SRR4408963	Milk	PRJNA305942	4656184
	SRR4408965	Milk	PRJNA305942	5001550
	SRR4408971	Milk	PRJNA305942	3684868
	SRR4408974	Milk	PRJNA305942	3522816
	SRR4408976	Milk	PRJNA305942	3403612
	SRR4408977	Milk	PRJNA305942	3335816
	SRR4408978	Milk	PRJNA305942	4931756
	SRR4408982	Milk	PRJNA305942	5859858
	SRR4408998	Milk	PRJNA305942	3876750
	SRR4409001	Milk	PRJNA305942	5511220
	SRR4409005	Milk	PRJNA305942	5991162
	SRR4409009	Milk	PRJNA305942	6126822
	SRR4409010	Milk	PRJNA305942	6079982
	SRR4409013	Milk	PRJNA305942	2983928
	SRR4409014	Milk	PRJNA305942	4740548
	SRR4409015	Milk	PRJNA305942	4086926
	SRR4409016	Milk	PRJNA305942	5500242
	SRR4409018	Milk	PRJNA305942	2909426
	SRR4409024	Milk	PRJNA305942	3409142
	SRR4409025	Milk	PRJNA305942	5427006
	SRR5809440	Milk	PRJNA392196	4900526
	SRS1206437	Milk	PRJNA305942	2237084
	SRS1206446	Milk	PRJNA305942	4083452
	SRR6324365	Milk	PRJNA419906	3595306
	SRR6324366	Milk	PRJNA419906	4270878
	SRR6324367	Milk	PRJNA419906	3888648
	SRR6324368	Milk	PRJNA419906	1582578
	SRR6324370	Milk	PRJNA419906	2240214
	SRR6324371	Milk	PRJNA419906	1823718
	SRR6324372	Milk	PRJNA419906	1930008
	SRR1554878	Milk	PRJNA258561	245342
	SRR1554941	Milk	PRJNA258561	286980
	SRR1554950	Milk	PRJNA258561	530550
	SRR1554957	Milk	PRJNA258561	308940
	SRR1554958	Milk	PRJNA258561	568410
	ERR1360992	Muscle	PRJEB13582	319826
	ERR1360993	Muscle	PRJEB13582	350520
	ERR1360994	Muscle	PRJEB13582	343986
	ERR1360995	Muscle	PRJEB13582	222670
	ERR1360996	Muscle	PRJEB13582	262874
	ERR1360997	Muscle	PRJEB13582	205312
	ERR1360998	Muscle	PRJEB13582	366724
	ERR528490	Muscle	PRJEB6504	461710
	ERR528491	Muscle	PRJEB6504	405508
	ERR528492	Muscle	PRJEB6504	269884
	ERR528493	Muscle	PRJEB6504	293900
	ERR528494	Muscle	PRJEB6504	222254
	ERR528495	Muscle	PRJEB6504	278546
	SRR1607606	Muscle	PRJNA263327	1664900
	SRR1607607	Muscle	PRJNA263327	317046
	SRR1607608	Muscle	PRJNA263327	333494
	SRR1607609	Muscle	PRJNA263327	353268
	SRR1607610	Muscle	PRJNA263327	326822
	SRR1607611	Muscle	PRJNA263327	359972
	SRR1607612	Muscle	PRJNA263327	408650
	SRR1607614	Muscle	PRJNA263327	346240
	SRR1607615	Muscle	PRJNA263327	311142
	SRR1607616	Muscle	PRJNA263327	329348
	SRR1607617	Muscle	PRJNA263327	311696
	SRR1607618	Muscle	PRJNA263327	344922
	SRR1607619	Muscle	PRJNA263327	315862
	SRR1607620	Muscle	PRJNA263327	321424
	SRR1607621	Muscle	PRJNA263327	318210
	SRR1607622	Muscle	PRJNA263327	459562
	SRR1607623	Muscle	PRJNA263327	360270
	SRR1607624	Muscle	PRJNA263327	293172
	SRR1607625	Muscle	PRJNA263327	383762
	SRR1607627	Muscle	PRJNA263327	357366
	SRR1607628	Muscle	PRJNA263327	342500
	SRR1607629	Muscle	PRJNA263327	354416
	SRR1607630	Muscle	PRJNA263327	328268
	SRR1607631	Muscle	PRJNA263327	409912
	SRR1607632	Muscle	PRJNA263327	351266
	SRR1607634	Muscle	PRJNA263327	333940
	SRR1607636	Muscle	PRJNA263327	296350
	SRR1607637	Muscle	PRJNA263327	312460
	SRR1607638	Muscle	PRJNA263327	240260
	SRR1607639	Muscle	PRJNA263327	295652
	SRR1607640	Muscle	PRJNA263327	346556
	SRR1607641	Muscle	PRJNA263327	270988
	SRR1607642	Muscle	PRJNA263327	283354
	SRR1607643	Muscle	PRJNA263327	537976
	SRR1607644	Muscle	PRJNA263327	235170
	SRR1607645	Muscle	PRJNA263327	244754
	SRR1607646	Muscle	PRJNA263327	269520
	SRR1607647	Muscle	PRJNA263327	251008
	SRR1607648	Muscle	PRJNA263327	275328
	SRR1607649	Muscle	PRJNA263327	345588
	SRR1607650	Muscle	PRJNA263327	235144
	SRR1607651	Muscle	PRJNA263327	386436
	SRR1607652	Muscle	PRJNA263327	264958
	SRR1607653	Muscle	PRJNA263327	266802
	SRR1767623	Muscle	PRJNA273164	189496
	SRR1767639	Muscle	PRJNA273164	94800
	SRR1767643	Muscle	PRJNA273164	85396
	SRR1767647	Muscle	PRJNA273164	493950
	SRR1767655	Muscle	PRJNA273164	69618
	SRR1767659	Muscle	PRJNA273164	112220
	SRR5190379	Muscle	PRJNA362606	606592
	SRR527003	Muscle	PRJNA171257	92770
	SRR527007	Muscle	PRJNA171257	104386
	SRR527011	Muscle	PRJNA171257	109376
	SRR527019	Muscle	PRJNA171257	101904
	SRR527030	Muscle	PRJNA171257	122848
	SRS1051923	Muscle	PRJNA294306	221868
	SRR7513519	Muscle	PRJNA480770	1096650
	SRR7513521	Muscle	PRJNA480770	98430
	SRR7513523	Muscle	PRJNA480770	715126
	SRR7513524	Muscle	PRJNA480770	366036
	SRR7513525	Muscle	PRJNA480770	1002028
	SRR7513526	Muscle	PRJNA480770	1235350
	SRR7513527	Muscle	PRJNA480770	360882
	SRR7513528	Muscle	PRJNA480770	532428
	SRR7513529	Muscle	PRJNA480770	1065118
	SRR7513530	Muscle	PRJNA480770	716044
	SRR7513531	Muscle	PRJNA480770	824070
	SRR7513533	Muscle	PRJNA480770	1074864
	SRR7513534	Muscle	PRJNA480770	961204
	SRR7513535	Muscle	PRJNA480770	4900196
	SRR7513536	Muscle	PRJNA480770	1235876
	SRR7792015	Muscle	PRJNA489591	2041802
	SRR7792016	Muscle	PRJNA489591	2210156
	SRS3744995	Muscle	PRJNA489591	615294
	SRS3744996	Muscle	PRJNA489591	1270594
	SRS3744997	Muscle	PRJNA489591	1555548
	SRS3744998	Muscle	PRJNA489591	687964
	SRS3744999	Muscle	PRJNA489591	350848
	SRS3745000	Muscle	PRJNA489591	1342150
	SRS3745002	Muscle	PRJNA489591	1629356
	SRS3745003	Muscle	PRJNA489591	592142
	SRS3745004	Muscle	PRJNA489591	454130
	SRS3745005	Muscle	PRJNA489591	1191298
	SRS3745006	Muscle	PRJNA489591	302216
	SRS3745007	Muscle	PRJNA489591	799576
	SRS3745016	Muscle	PRJNA489591	225298
	SRS3745017	Muscle	PRJNA489591	729022
	SRS3745018	Muscle	PRJNA489591	235622
	SRS3745021	Muscle	PRJNA489591	1626582
	SRS3745022	Muscle	PRJNA489591	365432
	SRS3745024	Muscle	PRJNA489591	1521220
	SRS3745025	Muscle	PRJNA489591	3653582
	SRS3745031	Muscle	PRJNA489591	835596
	SRS3745034	Muscle	PRJNA489591	720008
	SRS3745035	Muscle	PRJNA489591	1435456
	SRS3745036	Muscle	PRJNA489591	947068
	SRS3745039	Muscle	PRJNA489591	311158
	SRS3745040	Muscle	PRJNA489591	597730
	SRS3745041	Muscle	PRJNA489591	386126
	SRS3745042	Muscle	PRJNA489591	4789100
	SRS3745043	Muscle	PRJNA489591	853242
	SRS3745044	Muscle	PRJNA489591	1271206
	SRS3745045	Muscle	PRJNA489591	655532
	SRS3745046	Muscle	PRJNA489591	883960
	SRS3745047	Muscle	PRJNA489591	1589970
	SRR7188614	Muscle	PRJNA472238	1170366
	SRR7188615	Muscle	PRJNA472238	8258664
	SRR7188616	Muscle	PRJNA472238	2097170
	SRR7188617	Muscle	PRJNA472238	6198216
	SRR7188618	Muscle	PRJNA472238	3156536
	SRR7188620	Muscle	PRJNA472238	9399238
	SRR7188621	Muscle	PRJNA472238	6805114
	SRR7188622	Muscle	PRJNA472238	1914132
	SRR7188623	Muscle	PRJNA472238	1388640
	SRR7478856	Muscle	PRJNA480009	1203836
	SRR7513532	Muscle	PRJNA480770	1929316
	SRR8893820	Muscle	PRJNA532321	4634654
	SRR8893821	Muscle	PRJNA532321	4138126
	SRR8893822	Muscle	PRJNA532321	4773746
	SRR8893824	Muscle	PRJNA532321	3256084
	SRR8893825	Muscle	PRJNA532321	4389986
	SRS4394622	Muscle	PRJNA522422	86810
	SRS4394626	Muscle	PRJNA522422	436368
	SRS4394646	Muscle	PRJNA522422	389368
	SRS4394687	Muscle	PRJNA522422	526158
	SRS4394731	Muscle	PRJNA522422	467952
	SRS4394735	Muscle	PRJNA522422	717582
	SRS4394745	Muscle	PRJNA522422	432718
	SRS4394791	Muscle	PRJNA522422	354322
	SRS4394801	Muscle	PRJNA522422	456518
	SRS4394829	Muscle	PRJNA522422	581418
	SRS4394856	Muscle	PRJNA522422	439202
	SRS4394865	Muscle	PRJNA522422	384078
	SRS4394875	Muscle	PRJNA522422	486598
	SRS4394901	Muscle	PRJNA522422	453592
	SRS4394906	Muscle	PRJNA522422	455468
	SRS4394909	Muscle	PRJNA522422	754732
	SRS4394938	Muscle	PRJNA522422	380634
	ERS3175501	Muscle	PRJEB31379	300868
	ERS3175510	Muscle	PRJEB31379	212470
	ERS3175511	Muscle	PRJEB31379	229516
	ERS3175514	Muscle	PRJEB31379	274004
	ERS3175515	Muscle	PRJEB31379	408820
	ERS3175516	Muscle	PRJEB31379	237264
	ERS3175518	Muscle	PRJEB31379	827140
	ERS3175522	Muscle	PRJEB31379	483178
	ERS3175523	Muscle	PRJEB31379	235234
	ERS3175524	Muscle	PRJEB31379	346470
	ERS3175525	Muscle	PRJEB31379	272906
	ERS3175526	Muscle	PRJEB31379	363856
	ERS3175527	Muscle	PRJEB31379	573236
	ERS3175528	Muscle	PRJEB31379	1114660
	ERS3175529	Muscle	PRJEB31379	1045776
	ERS3175531	Muscle	PRJEB31379	846664
	ERS3175532	Muscle	PRJEB31379	669330
	ERS3175533	Muscle	PRJEB31379	272976
	ERS3175534	Muscle	PRJEB31379	442450
	ERS3175535	Muscle	PRJEB31379	516350
	ERS3175536	Muscle	PRJEB31379	636004
	ERS3175538	Muscle	PRJEB31379	654528
	ERS3175539	Muscle	PRJEB31379	1200818
	ERS3175540	Muscle	PRJEB31379	843022
	ERS3175541	Muscle	PRJEB31379	762166
	ERS3175542	Muscle	PRJEB31379	1129922
	ERS3175543	Muscle	PRJEB31379	1393942
	ERS3175544	Muscle	PRJEB31379	791822
	ERS3175545	Muscle	PRJEB31379	476990
	ERS3175546	Muscle	PRJEB31379	745058
	ERS3175547	Muscle	PRJEB31379	813528
	ERS3175548	Muscle	PRJEB31379	722832
	ERS3175549	Muscle	PRJEB31379	1143728
	ERS3175550	Muscle	PRJEB31379	999450
	ERS3175554	Muscle	PRJEB31379	475516
	ERS3175555	Muscle	PRJEB31379	1595736
	ERS3175556	Muscle	PRJEB31379	955060
	ERS3175557	Muscle	PRJEB31379	992490
	ERS3175558	Muscle	PRJEB31379	765912
	ERS3175559	Muscle	PRJEB31379	468376
	ERS3175560	Muscle	PRJEB31379	431614
	ERS3175563	Muscle	PRJEB31379	499470
	ERS3175564	Muscle	PRJEB31379	753904
	ERS3175565	Muscle	PRJEB31379	494654
	ERS3175566	Muscle	PRJEB31379	717528
	ERS3175567	Muscle	PRJEB31379	396528
	ERS3175568	Muscle	PRJEB31379	803082
	ERS3175569	Muscle	PRJEB31379	1304462
	ERS3175570	Muscle	PRJEB31379	302136
	ERS3175571	Muscle	PRJEB31379	463494
	ERS3175572	Muscle	PRJEB31379	420132
	ERS3175573	Muscle	PRJEB31379	992520
	ERS3175574	Muscle	PRJEB31379	365826
	ERS3175576	Muscle	PRJEB31379	632426
	ERS3175577	Muscle	PRJEB31379	602002
	SRR5099738	Muscle	PRJNA357099	1296496
	SRR5099739	Muscle	PRJNA357099	3203512
	SRR5099740	Muscle	PRJNA357099	2763800
	SRR5099741	Muscle	PRJNA357099	2092906
	SRR594479	Muscle	PRJNA177791	2325144
	SRS1051921	Muscle	PRJNA294306	285076
	SRS1072536	Nasal_pharynx	PRJNA272725	859202
	SRS1072541	Nasal_pharynx	PRJNA272725	824266
	SRS1072546	Nasal_pharynx	PRJNA272725	765854
	SRS1072550	Nasal_pharynx	PRJNA272725	839140
	SRS1072556	Nasal_pharynx	PRJNA272725	954612
	SRS1072561	Nasal_pharynx	PRJNA272725	1002602
	SRS1072566	Nasal_pharynx	PRJNA272725	696684
	SRS1072571	Nasal_pharynx	PRJNA272725	723740
	SRS1072576	Nasal_pharynx	PRJNA272725	820556
	SRS1072581	Nasal_pharynx	PRJNA272725	721414
	SRS1072586	Nasal_pharynx	PRJNA272725	779456
	SRS1072591	Nasal_pharynx	PRJNA272725	808780
	SRS4394660	Nasal_pharynx	PRJNA522422	1110438
	SRS4394665	Nasal_pharynx	PRJNA522422	730008
	SRS4394677	Nasal_pharynx	PRJNA522422	1312088
	SRS4394767	Nasal_pharynx	PRJNA522422	1048054
	SRS4394792	Nasal_pharynx	PRJNA522422	881722
	SRS4394836	Nasal_pharynx	PRJNA522422	947950
	SRS4394862	Nasal_pharynx	PRJNA522422	811668
	SRS4394870	Nasal_pharynx	PRJNA522422	1170422
	SRS4394891	Nasal_pharynx	PRJNA522422	1119318
	SRS4394896	Nasal_pharynx	PRJNA522422	989510
	SRR8209432	Oocyte	PRJNA506215	864892
	SRR8209433	Oocyte	PRJNA506215	1379990
	SRR2551769	Ovary	PRJNA297704	8664480
	SRR2551771	Ovary	PRJNA297704	9601297
	SRR3744926	Ovary	PRJNA327905	398530
	SRR3744976	Ovary	PRJNA327905	1551856
	SRR3744978	Ovary	PRJNA327905	391456
	SRR3744980	Ovary	PRJNA327905	330636
	SRR3744981	Ovary	PRJNA327905	352992
	SRR3744982	Ovary	PRJNA327905	369548
	SRR3821926	Ovary	PRJNA328360	811438
	SRR3821930	Ovary	PRJNA328360	775568
	SRR3821931	Ovary	PRJNA328360	1008230
	SRR3821932	Ovary	PRJNA328360	1067936
	SRR3821933	Ovary	PRJNA328360	2258904
	SRR3821934	Ovary	PRJNA328360	831734
	SRR2553318	Ovary	PRJNA200354	467102
	SRS1145200	Oviduct	PRJNA300963	1176030
	SRS1145203	Oviduct	PRJNA300963	964114
	SRR3939283	Palatine_tonsil	PRJNA330720	1687948
	SRR3939285	Palatine_tonsil	PRJNA330720	2204922
	SRR3939286	Palatine_tonsil	PRJNA330720	2070260
	SRR3939287	Palatine_tonsil	PRJNA330720	2166430
	SRR3939288	Palatine_tonsil	PRJNA330720	1055562
	SRR3939290	Palatine_tonsil	PRJNA330720	1891948
	SRR3939292	Palatine_tonsil	PRJNA330720	2545532
	SRR3939294	Palatine_tonsil	PRJNA330720	1234912
	ERS1796004	PBMC	PRJEB21455	5589268
	SRR7441375	PBMC	PRJNA476753	1909414
	SRR7441376	PBMC	PRJNA476753	1693378
	SRR7441377	PBMC	PRJNA476753	1284748
	SRR7441379	PBMC	PRJNA476753	1719534
	SRR7441380	PBMC	PRJNA476753	1329140
	SRR7441381	PBMC	PRJNA476753	1559496
	SRR7441382	PBMC	PRJNA476753	1761062
	SRR7441383	PBMC	PRJNA476753	2112272
	SRR7441384	PBMC	PRJNA476753	1671346
	SRR7441385	PBMC	PRJNA476753	1731254
	SRR8614283	Pharyngeal_tonsil	PRJNA522422	507012
	SRR8614296	Pharyngeal_tonsil	PRJNA522422	692556
	SRR8614351	Pharyngeal_tonsil	PRJNA522422	1114938
	SRR8614522	Pharyngeal_tonsil	PRJNA522422	1359804
	SRR8614546	Pharyngeal_tonsil	PRJNA522422	663746
	SRR8614578	Pharyngeal_tonsil	PRJNA522422	552058
	SRR8614671	Pharyngeal_tonsil	PRJNA522422	626152
	SRR8614715	Pharyngeal_tonsil	PRJNA522422	735660
	SRS1072525	Pharyngeal_tonsil	PRJNA272725	143666
	SRR1767624	Pituitarygland	PRJNA273164	206274
	SRR1767628	Pituitarygland	PRJNA273164	228260
	SRR1767636	Pituitarygland	PRJNA273164	102436
	SRR1767640	Pituitarygland	PRJNA273164	142088
	SRR1767648	Pituitarygland	PRJNA273164	507444
	SRR1767656	Pituitarygland	PRJNA273164	236222
	SRR1767660	Pituitarygland	PRJNA273164	205990
	SRS1051931	Pons	PRJNA294306	200084
	SRR1122446	Primary_Muscle_satellite_cells	PRJNA235347	1766078
	SRR4010643	Proximal_jejunum	PRJNA338058	8132548
	SRR4010667	Proximal_jejunum	PRJNA338058	2018722
	SRR1920189	Rectum	PRJNA278944	4104446
	SRR1920190	Rectum	PRJNA278944	3152746
	SRR1920191	Rectum	PRJNA278944	2251950
	SRR1920192	Rectum	PRJNA278944	4449798
	SRR1920194	Rectum	PRJNA278944	1633606
	SRR1920195	Rectum	PRJNA278944	3696526
	SRR1920196	Rectum	PRJNA278944	3204776
	SRR1920197	Rectum	PRJNA278944	3981570
	SRS4394624	Retropharyngeal_nodes	PRJNA522422	1371902
	SRS4394662	Retropharyngeal_nodes	PRJNA522422	935004
	SRS4394678	Retropharyngeal_nodes	PRJNA522422	1268756
	SRS4394777	Retropharyngeal_nodes	PRJNA522422	878184
	SRS4394796	Retropharyngeal_nodes	PRJNA522422	1097246
	SRS4394874	Retropharyngeal_nodes	PRJNA522422	816468
	SRS4394894	Retropharyngeal_nodes	PRJNA522422	909462
	SRS4394899	Retropharyngeal_nodes	PRJNA522422	1207518
	SRS4394918	Retropharyngeal_nodes	PRJNA522422	1055108
	SRS4394925	Retropharyngeal_nodes	PRJNA522422	897740
	SRR3939227	RPLN	PRJNA329305	1289504
	SRR3939231	RPLN	PRJNA329305	3005380
	SRR3939232	RPLN	PRJNA329305	1584272
	SRR3939233	RPLN	PRJNA329305	1841910
	SRR3939234	RPLN	PRJNA329305	3307694
	SRR3939235	RPLN	PRJNA329305	2677158
	SRR3939236	RPLN	PRJNA329305	1936620
	SRR5990177	Rumen	PRJNA400067	7219748
	SRR5990178	Rumen	PRJNA400067	3916886
	SRR5990181	Rumen	PRJNA400067	3527008
	SRR5990182	Rumen	PRJNA400067	3407594
	SRR5990198	Rumen	PRJNA400067	5313952
	SRR5990199	Rumen	PRJNA400067	2465002
	SRR5990201	Rumen	PRJNA400067	3037782
	SRR5990202	Rumen	PRJNA400067	2619728
	SRR5990203	Rumen	PRJNA400067	5555316
	SRR5990204	Rumen	PRJNA400067	2403062
	SRR5990205	Rumen	PRJNA400067	2362044
	SRR5990206	Rumen	PRJNA400067	5414236
	SRR5990207	Rumen	PRJNA400067	3249222
	SRR5990218	Rumen	PRJNA400067	706064
	SRR5990220	Rumen	PRJNA400067	5275542
	SRR5990221	Rumen	PRJNA400067	2515570
	SRR5990222	Rumen	PRJNA400067	1090054
	SRR5990223	Rumen	PRJNA400067	2309996
	SRR5990224	Rumen	PRJNA400067	1192554
	SRR5990226	Rumen	PRJNA400067	3435442
	SRR5990227	Rumen	PRJNA400067	3316802
	SRR3183552	Rumen	PRJNA312901	3505284
	SRR3183553	Rumen	PRJNA312901	1692636
	SRR3183554	Rumen	PRJNA312901	1183564
	SRR3183555	Rumen	PRJNA312901	1725366
	SRR3183558	Rumen	PRJNA312901	2060178
	SRR3183559	Rumen	PRJNA312901	1000872
	SRR3183560	Rumen	PRJNA312901	1750360
	SRR3183561	Rumen	PRJNA312901	2933866
	SRR3183562	Rumen	PRJNA312901	1877328
	SRR3183563	Rumen	PRJNA312901	2278410
	SRR3183564	Rumen	PRJNA312901	1920752
	SRR3183565	Rumen	PRJNA312901	2181984
	SRR3183566	Rumen	PRJNA312901	1415006
	SRR3183568	Rumen	PRJNA312901	1663816
	SRR3183569	Rumen	PRJNA312901	1992936
	SRR3083789	Rumen	PRJNA307579	2202762
	SRR3083790	Rumen	PRJNA307579	1269442
	SRR3083791	Rumen	PRJNA307579	3280804
	SRR3083792	Rumen	PRJNA307579	6619896
	SRR3083793	Rumen	PRJNA307579	2279098
	SRR3083794	Rumen	PRJNA307579	7930354
	SRR3083797	Rumen	PRJNA307579	2585156
	SRR3083798	Rumen	PRJNA307579	4506488
	SRR3083800	Rumen	PRJNA307579	3319560
	SRR3083802	Rumen	PRJNA307579	4108088
	SRR3083803	Rumen	PRJNA307579	2513256
	SRR3083804	Rumen	PRJNA307579	5300922
	SRR3083805	Rumen	PRJNA307579	2811022
	SRR3083807	Rumen	PRJNA307579	3083134
	SRS625408	Skin	PRJNA251439	94934
	SRS4394634	Small_Intestine	PRJNA522422	832882
	SRS4394648	Small_Intestine	PRJNA522422	735376
	SRS4394693	Small_Intestine	PRJNA522422	914610
	SRS4394695	Small_Intestine	PRJNA522422	984036
	SRS4394704	Small_Intestine	PRJNA522422	989330
	SRS4394727	Small_Intestine	PRJNA522422	1071322
	SRS4394730	Small_Intestine	PRJNA522422	886562
	SRS4394733	Small_Intestine	PRJNA522422	1764336
	SRS4394734	Small_Intestine	PRJNA522422	710160
	SRS4394739	Small_Intestine	PRJNA522422	677332
	SRS4394743	Small_Intestine	PRJNA522422	1049826
	SRS4394755	Small_Intestine	PRJNA522422	511904
	SRS4394756	Small_Intestine	PRJNA522422	975300
	SRS4394776	Small_Intestine	PRJNA522422	883792
	SRS4394788	Small_Intestine	PRJNA522422	1079728
	SRS4394807	Small_Intestine	PRJNA522422	2247886
	SRS4394825	Small_Intestine	PRJNA522422	477402
	SRS4394833	Small_Intestine	PRJNA522422	580108
	SRS4394841	Small_Intestine	PRJNA522422	521676
	SRS4394857	Small_Intestine	PRJNA522422	874782
	SRS4394861	Small_Intestine	PRJNA522422	1472462
	SRS4394869	Small_Intestine	PRJNA522422	1199246
	SRS4394878	Small_Intestine	PRJNA522422	711144
	SRS4394902	Small_Intestine	PRJNA522422	771586
	SRS4394924	Small_Intestine	PRJNA522422	684468
	SRS4394937	Small_Intestine	PRJNA522422	774850
	SRR5190450	Spleen	PRJNA362606	1081318
	SRR5190451	Spleen	PRJNA362606	1005904
	SRR5190452	Spleen	PRJNA362606	1981010
	SRR594480	Spleen	PRJNA177791	3065376
	SRS1051918	Spleen	PRJNA294306	694738
	SRR594490	Testes	PRJNA177791	1499442

## Sheet: Table S8
	Table S8 Linkages among contigs, genes, and ESTs
	Contig_name	Gene_ID	Gene_symbol	gene position (Chr)	gene position (Satrt)	gene position (End)	EST_ID
	contig_9354	NM_001015660	FAM76A	chr2	125604200	125635148	DV791921,DW521568,DW521393,CF615418,DY454906,CF614981
	contig_16634	NM_001034252	FBXL21	chr7	47371755	47390346	CK832044
	contig_18184	NM_001040537	GTF2H5	chr9	94714827	94728878	EE975272,BM432097
	contig_20156	NM_001046400	ZNRD1	chr23	28917104	28920535	HX924636
	contig_10792	NM_001076363	UBA52	chr7	4603743	4606128	DN549670
	contig_12863	NM_001077006	HSFY2 heat shock transcription factor, Y-linked 2	chrY			EH124536,EH123115,DT847586,DT844162,DT841190,DT841029,DT837162,EV609670,EH125474,EH125304,DT858209,DT857745,DT842286,DT841956,DT837283,DT840725,EH125381,DT861652,DT858596,DT852206,DT850621,DT843677,DT843240,DT832069,EH123724,EH371993
	contig_10426	NM_001077070	MGC134093	chr20	37816350	37817869	EH372518,DT846639,DT852992
	contig_13446	NM_001077979	PRAME preferentially expressed antigen in melanoma	chrY			DT834384
	contig_20758	NM_001079796	LOC780876	chrUn_NW_020190807v1	6359	14611	DT839955
	contig_17666	NM_001080923	LA-DQB MHC cell surface glycoprotein				EV739462,EV734333,DY167106
	contig_9649	NM_001080923	LA-DQB MHC cell surface glycoprotein				EV739462,EV734333,EV733372,DY058843,EV733235,DY138721,CB431014,CB430299,EE354718
	contig_3905	NM_001098131	RPL22L1	chr1	96572444	96576821	DY172706
	contig_18519	NM_001098469	LOC617079	chrUn_NW_020191148v1	662772	673706	DN288529,DN287334,EH151509
	contig_18929	NM_001098469	LOC617079	chrUn_NW_020191148v1	662772	673706	DY131170
	contig_1330	NM_001145509	USP9Y ubiquitin specific peptidase 9, Y-linked	chrY			BI775397
	contig_18208	NM_001145509	USP9Y ubiquitin specific peptidase 9, Y-linked	chrY			EW684154,EV649700,CK968743,CB442731,CB442368,EE226486,GH315216,DY137403,BM430974
	contig_20042	NM_001145509	USP9Y ubiquitin specific peptidase 9, Y-linked	chrY			EW684154,EV649700,CK968743,CB442731,CB442368,EE226486,GH315216,BM430974
	contig_20308	NM_001145509	USP9Y ubiquitin specific peptidase 9, Y-linked	chrY			BI775397
	contig_2205	NM_001145509	USP9Y ubiquitin specific peptidase 9, Y-linked	chrY			GH315216,BM430974,CK968743
	contig_8874	NM_001145509	USP9Y ubiquitin specific peptidase 9, Y-linked	chrY			GH315216,BM430974,DY137403,CK968743,BM430974
	contig_1087	NM_001172595	DDX3Y DEAD (Asp-Glu-Ala-Asp) box polypeptide 3, Y-linked	chrY			DV783415
	contig_6039	NM_001192040	CDV3	chr1	135867528	135881717	DY141009,DY130408
	contig_1923	NM_001206490	ITGB3	chr19	46330530	46392424	CB538878,BE479855
	contig_22069	NM_174225	ACTA1	chr28	1400445	1403202	DV795867,DV799138,DV794779,DV791608,DV796410
	contig_10383	NM_174381	LHCGR	chr11	30977804	31040327	EV618246,EE361329,DV925270,DV918554,EV783149,EH202937,EE224835,DV912667,EE354410
	contig_20531	NM_174381	LHCGR	chr11	30977804	31040327	EE352493,EE221351
	contig_2667	NM_177491	ZFY zinc finger protein, Y-linked	chrY			EE370547

## Sheet: Table S9
	Table S9 Deletion validation using PCR and sanger sequencing
	Deletion	chr	Start	End	Microhomology/insertion length	Sample1	Sample2	Sample5	Sample6	Sample8	Sample3	Sample4	Sample7	Sample9	Sample10
	D1	chr1	65092576	65092828	16	2	2	2	2	2	2	2	2	12	2
	D2	chr2	90885396	90886534	15	2	2	2	2	2	2	2	2	2	2
	D3	chr9	97936982	97937455	15	2	2	2	12	2	2	2	2	2	2
	D4	chr10	10531874	10532754	-6	12	2	12	2	2	2	12	1	12	2
	D5	chr10	83129240	83129884	15	2	12	2	12	12	12	2	12	2	2
	D6	chr17	63997685	63998117	-10	2	2	2	2	2	2	2	2	2	2
	D7	chr24	14321178	14321622	12	2	2	2	2	2	2	2	2	2	2
	D8	chr25	14182074	14182383	0	2	2	2	2	2	2	2	2	2	2
	Note: 12 means heterozygote deletion; 2 means homozygote deletion

## Sheet: Table S10
Table S10A GO analysis for genes located in SV cluster regions				Table S10B Pathway analysis for genes located in SV cluster regions				Table S10C GO analysis for genes located in SV desert regions				Table S10D Pathway analysis for genes located in SV desert regions
Term	P-Value	Fold Enrichment		Term	P-Value	Fold Enrichment		Term	P-Value	Fold Enrichment		Term	P-Value	Fold Enrichment
detection of chemical stimulus involved in sensory perception of smell	2.8e-15	7.7		beta-Alanine metabolism	0.0029	4.1		palate development	0.00013	3.3		Neuroactive ligand-receptor interaction	0.00064	1.9
protein catabolic process	2.2e-11	7.1		Nitrogen metabolism	0.014	5.1		axon guidance	0.00024	2.9		Insulin secretion	0.00073	3
one-carbon metabolic process	4.2e-05	5.5		Inflammatory mediator regulation of TRP channels	0.017	2.2		embryonic forelimb morphogenesis	0.00039	4.8		Calcium signaling pathway	0.0012	2.1
maintenance of DNA repeat elements	0.00091	16.1		Metabolic pathways	0.025	1.2		homophilic cell adhesion via plasma membrane adhesion molecules	0.00074	2.6		Cholinergic synapse	0.0015	2.5
negative regulation of potassium ion transmembrane transporter activity	0.0022	12.9		Phosphatidylinositol signaling system	0.026	2.1		ventricular septum morphogenesis	0.00086	5.7		Pancreatic secretion	0.0032	2.5
proteolysis	0.0028	2		Glycerolipid metabolism	0.028	2.5		cell migration	0.00093	2.4		Axon guidance	0.0052	2.2
hormone-mediated signaling pathway	0.003	5.7		Histidine metabolism	0.035	3.9		cellular water homeostasis	0.0011	6.8		Thyroid hormone synthesis	0.0057	2.8
neuronal action potential	0.0099	4.4		Colorectal cancer	0.036	2.4		negative regulation of serine-type endopeptidase activity	0.0012	9.2		Cell adhesion molecules (CAMs)	0.0071	2
phosphatidylinositol phosphorylation	0.0099	4.4						protein citrullination	0.0012	14.8		Platelet activation	0.014	2
negative regulation of post-translational protein modification	0.011	16.1						positive regulation of embryonic development	0.002	8.2		Leukocyte transendothelial migration	0.015	2.1
aromatic compound catabolic process	0.011	16.1						anterior/posterior pattern specification	0.0021	2.8		cGMP-PKG signaling pathway	0.02	1.9
regulation of ion transmembrane transport	0.015	5						activation of MAPK activity	0.0027	3.3		Pathways in cancer	0.021	1.5
meiotic mismatch repair	0.021	12.1						positive regulation of the force of heart contraction	0.0028	11.8		MAPK signaling pathway	0.021	1.6
cell redox homeostasis	0.026	2.5						establishment of epithelial cell polarity	0.0031	7.4		Rap1 signaling pathway	0.021	1.7
natural killer cell mediated cytotoxicity	0.027	5.9						positive regulation of transcription from RNA polymerase II promoter	0.0042	1.5		Nicotine addiction	0.032	2.9
membrane depolarization during action potential	0.027	3.4						proximal/distal pattern formation	0.0044	4.3		Retrograde endocannabinoid signaling	0.036	2
response to peptidoglycan	0.034	9.7						positive regulation of angiogenesis	0.0044	2.4		Inflammatory mediator regulation of TRP channels	0.036	2
neuroepithelial cell differentiation	0.034	9.7						positive regulation of T cell differentiation	0.0047	6.7		Aldosterone synthesis and secretion	0.037	2.2
regulation of mitophagy	0.038	3.8						ion transmembrane transport	0.0048	3.7		Chemokine signaling pathway	0.037	1.7
regulation of heart rate	0.038	3.8						locomotory behavior	0.005	2.6		T cell receptor signaling pathway	0.038	2
detection of mechanical stimulus involved in sensory perception of sound	0.043	5						negative regulation of extrinsic apoptotic signaling pathway in absence of ligand	0.0055	4.1		Hepatitis B	0.045	1.8
peptidyl-serine phosphorylation	0.045	1.9						positive regulation of neuron projection development	0.0064	3.2		Glycosaminoglycan biosynthesis - heparan sulfate / heparin	0.046	3.6
drug transmembrane transport	0.049	8						regulation of neurogenesis	0.0066	6.2		Vasopressin-regulated water reabsorption	0.047	2.6
maintenance of DNA methylation	0.049	8						synaptic transmission, cholinergic	0.0067	4		Adrenergic signaling in cardiomyocytes	0.048	1.8
positive regulation of helicase activity	0.049	8						lung development	0.0085	2.8
								cell activation	0.0088	8.4
								uterus development	0.009	5.7
								positive regulation of epithelial cell proliferation	0.0093	3.3
								cellular response to retinoic acid	0.0098	3.7
								neuron migration	0.011	2.3
								cilium movement	0.011	4.2
								activation of protein kinase B activity	0.012	5.3
								cell adhesion	0.013	1.8
								T-helper cell differentiation	0.013	14.8
								ovarian cumulus expansion	0.013	14.8
								heart development	0.015	2
								positive regulation of cardiac muscle cell proliferation	0.015	4.9
								long-term memory	0.015	4.9
								organ morphogenesis	0.019	3.2
								embryonic viscerocranium morphogenesis	0.019	6.6
								white fat cell differentiation	0.019	6.6
								sensory perception of sound	0.019	2.1
								regulation of small GTPase mediated signal transduction	0.02	4.6
								positive regulation of protein targeting to mitochondrion	0.021	2.4
								chondrocyte differentiation	0.022	3.1
								midbrain development	0.024	3.5
								cellular calcium ion homeostasis	0.025	2.3
								central nervous system myelination	0.025	11.1
								negative regulation of potassium ion transport	0.025	11.1
								anterior/posterior axon guidance	0.025	11.1
								cerebellar Purkinje cell layer development	0.026	5.9
								regulation of potassium ion transmembrane transport	0.026	5.9
								positive regulation of heart rate	0.026	5.9
								negative regulation of fibroblast growth factor receptor signaling pathway	0.026	5.9
								negative regulation of apoptotic process	0.027	1.6
								neural crest cell migration	0.027	2.7
								chemokine-mediated signaling pathway	0.027	2.7
								DNA recombination	0.028	3.4
								protein homooligomerization	0.029	1.8
								cell fate commitment	0.03	2.6
								cellular response to interferon-gamma	0.032	2.9
								microtubule depolymerization	0.034	5.4
								negative regulation of cell-matrix adhesion	0.034	5.4
								response to pain	0.034	5.4
								negative regulation of neuron apoptotic process	0.037	2
								negative regulation of neuron differentiation	0.037	2.5
								neutrophil chemotaxis	0.037	2.5
								positive regulation of synapse assembly	0.037	2.5
								embryonic cranial skeleton morphogenesis	0.037	3.2
								positive regulation of transcription, DNA-templated	0.039	1.5
								nephric duct morphogenesis	0.04	8.9
								glycerol transport	0.04	8.9
								regulation of protein kinase C signaling	0.04	8.9
								transcription, DNA-templated	0.041	1.3
								embryonic digestive tract development	0.043	4.9
								negative regulation of Rho protein signal transduction	0.043	4.9
								negative regulation of keratinocyte proliferation	0.043	4.9
								positive regulation of leukocyte chemotaxis	0.043	4.9
								positive regulation of endothelial cell migration	0.049	3
								cellular response to calcium ion	0.049	3
								positive regulation of tyrosine phosphorylation of Stat3 protein	0.049	3.5

[truncated: 11 more sheets: Table S11, Table S12, Table S13, Table S14, Table S15, Table S16, Table S17, Table S18, Table S19, Table S20, Table S21]
